# Supplementary material for: SVA retrotransposon insertion-associated deletion represents a novel mutational mechanism underlying large genomic copy number changes with non-recurrent breakpoints
Source: PubMed Central journal article supplement (PMC4229983; doi:10.1186/gb-2014-15-6-r80), 2014-06-02
Supplement: gb-2014-15-6-r80-S1.pdf [file gb-2014-15-6-r80-S1.pdf]

## Additional file 1

**Table S1:** Summary of the atypical *NFI* deletions analysed in previously published studies.

| <b>Patient ID</b> | <b>Deletion size (Mb)</b> | <b>Reference</b>                                                                                 |
|-------------------|---------------------------|--------------------------------------------------------------------------------------------------|
| UWA 106-3         | 3.2 – 3.7                 | Dorschner et al. (2000); Kayes et al. (1992); Kayes et al. (1994); Kehrer-Sawatzki et al. (2003) |
| UWA 155-1         | 2.1 – 2.7                 | Dorschner et al. (2000); Kehrer-Sawatzki et al. (2003)                                           |
| ID806             | ~7                        | Upadhyaya et al. (1996)                                                                          |
| 3724A             | 2.0 – 3.1                 | Cnossen et al. (1997); Kehrer-Sawatzki et al. (2003)                                             |
| UWA 113-1         | ~1                        | Dorschner et al. (2000)                                                                          |
| BUD               | 4.7                       | Jenne et al. (2000); Kehrer-Sawatzki et al. (2003)                                               |
| BL                | 3                         | Riva et al. (2000)                                                                               |
| 6                 | 3                         | Venturin et al. (2004a)                                                                          |
| 118               | 1                         | Venturin et al. (2004b)                                                                          |
| 442               | 2                         | Kehrer-Sawatzki et al. (2005)                                                                    |
| 806               | 5.5                       | Mantripragada et al. (2006); Pasmant et al. (2010)                                               |
| T165              | >2.2                      | Mantripragada et al. (2006)                                                                      |
| 282775            | >1.33                     | Mantripragada et al. (2006)                                                                      |
| T145              | 1.61 – 1.75               | Mantripragada et al. (2006)                                                                      |
| ASB4              | 1.07                      | Mantripragada et al. (2006)                                                                      |
| SNF1-2            | ~1.3                      | Maertens et al. (2007)                                                                           |
| SNF1-3            | 1.84 – 2.8                | Maertens et al. (2007)                                                                           |
| 552               | 2.7                       | Kehrer-Sawatzki et al. (2008)                                                                    |
| DUB               | 7.6                       | Pasmant et al. (2008)                                                                            |
| NF00028           | 0.84                      | Pasmant et al. (2009)                                                                            |
| NF00358           | 1.2                       | Pasmant et al. (2009)                                                                            |
| NF00234           | 0.87                      | Pasmant et al. (2010)                                                                            |
| NF00398           | 1.0                       | Pasmant et al. (2010)                                                                            |
| DIE               | 1.2                       | Pasmant et al. (2010)                                                                            |

**Table S2:** Locations of the atypical *NF1* deletion breakpoints identified in previous studies. The suggested mechanism underlying the deletions was non-homologous end joining in all cases.

| Patient ID | Deletion size | Centromeric deletion breakpoint |            |        | Telomeric deletion breakpoint |            |              | Reference                     |
|------------|---------------|---------------------------------|------------|--------|-------------------------------|------------|--------------|-------------------------------|
|            |               | located in                      | position   | repeat | located in                    | position   | repeat       |                               |
| 6          | 3-Mb          | <i>TMIGD1</i>                   | 28,651,627 | –      | <i>ASIC2</i>                  | 31,819,849 | –            | Venturin et al. (2004a)       |
| 442        | 2-Mb          | <i>EFCAB5</i>                   | 28,284,055 | L1M1   | <i>SUZ12</i>                  | 30,324,251 | –            | Kehrer-Sawatzki et al. (2005) |
| 552        | 2.7-Mb        | <i>NF1</i>                      | 29,560,750 | –      | <i>ASIC2</i>                  | 32,270,556 | MIRc         | Kehrer-Sawatzki et al. (2008) |
| DUB        | 7.6-Mb        | <i>PIPOX</i>                    | 27,381,233 | MIRb   | <i>GGNBP2</i>                 | 34,918,232 | <i>AluSx</i> | Pasmant et al. (2008)         |
| NF00028    | 0.84-Mb       | <i>LRRC37B2</i>                 | 28,919,249 | LINE   | <i>RAB11FIP4</i>              | 29,756,041 | <i>AluSq</i> | Pasmant et al. (2009)         |
| NF00358    | 1.2-Mb        | <i>BLMH</i>                     | 28,585,504 | –      | <i>RAB11FIP4</i>              | 29,770,680 | <i>AluSx</i> | Pasmant et al. (2009)         |

**Table S3:** Analysis of retrotransposons and non-B DNA sequence motifs located within the breakpoint-flanking sequences of the 15 atypical *NF1* deletions with simple breakpoints. The breakpoint-flanking sequences encompass 300-bp each and were downloaded from the UCSC Genome browser (hg19). Each 300-bp fragment comprises 150-bp proximal (centromeric) and 150-bp distal (telomeric) to the breakpoint which is located between the nucleotides highlighted in black. This deletion breakpoint dataset was screened for the presence of non-B DNA forming sequences using the non-B DNA database (<http://nonb.abcc.ncifcrf.gov>; Cer et al. 2013). Retrotransposons were identified by means of the UCSC Repeat Masker Track (<http://genome.ucsc.edu/>).

| Patient ID        | Breakpoint-flanking sequences (5'→3')                                                                                                                                                                                                                                                                           | Retrotransposon at breakpoint | Non-B DNA sequence motif (length of the motif, number of nucleotides between the motifs) |
|-------------------|-----------------------------------------------------------------------------------------------------------------------------------------------------------------------------------------------------------------------------------------------------------------------------------------------------------------|-------------------------------|------------------------------------------------------------------------------------------|
| 61541 proximal    | TTTTGCATACTTACTCTTGAAGGTGCCTCATCAGTTGCCATTTGAGCATACTGATTCTTAAAAATTTGAATATTCAGAACAAATTTGAAAAATATTCC TTGTATAATTTTTGGTTTTGTAGTAATCCTTTGTTTTCTTCACAGTACCTTCTGCAGAGTGATCCATTTGTAATTAATAGACACACACACA TCATCCA CCATTCAGCTTTATCTTCTCATTAGAAAGTGCCTCTAACCCCTATATTTTGAGATCCTGGATTTTCAGAAATATTGGACTTGATGTAGACAGAGTTTCTCA    | –                             | Cruciform (6-bp, 0-bp);<br>STR/Z-DNA (11-bp)                                             |
| 61541 distal      | GCAATGTCCAATAGAACGTTCTTTAATGGTGGAAAGTGGAAATGAAAGTTTACTATCTGTACTGTCCAATATAGTAACCATATACCTACTGAGCACTTGA AATGTGGCCAATGTGAATAAATTGAATAATTCTAATAAAATTTAAATTGCATCATGTGCCTTGGAGCTACTGTCTAACAGTGCAACTCTAGGTGTACTA GCTAGATGTGTTTTATAAACCCTGCAATATTGAGAATCAGATACAGGGATGTGATGACCCAGGTGACCACCCTTATAGCCTTGTTTAAAGGAGACTACCA   | –                             | Cruciform (6-bp, 3-bp)                                                                   |
| 70969 proximal    | AGGAATTAGGAAGTATATATATATATAAATGGAATGTGTAGATGTGTTTTAGAGACAGGATCTCACTCTTTCGCCAGACTAGAGGGCAGTGACAGGAT CATAGCTCACTGCAGCCTTGAACCTCTTGGCTCAAGAGATCCTTCCACCAGCCTCTGAGGTAGCTAGGACTACAGGCACATGACACCCACACACCCAG CTAATTTTTTGACATTTGTATAGACGAGGTCTCTGTGTGTGTCAGGCTGGTCTTGAACCTTGGCCTTAAAGTATATTCTTGCTTGGCCTCCCAAAGT         | <i>AluJr</i>                  | STR (14-bp)/<br>Cruciform (7-bp, 0-bp)                                                   |
| 70969 distal      | TAAGTATTGTGATATTTGTGTCAGCGAGAACAGGGAAGCCTAGACAAAGGACACTTACGACTAAGGTCTTGGCCGGGCGCGGTGGCTCACTCTGTAATATC AGCATTGGGAGGTCGAGGTGGGCAGATCATATGAGGTGAGGAGTTCAGACCAACCTGGCCAAACATGGTGAACCCCGCTCTACTAAAAATACAAAA ATAAGCCGGGTGTGGTGGCACATGCCTGTAATCCAGCTACTTGGGAGGCTGAGGCAGGAGAATTGCTTGAACACGAGAGGCGGAGGTTGCAGTGAGCTG      | <i>AluSx</i>                  | –                                                                                        |
| 100206 proximal   | ACCCACCTTGGCCTCTGAAAGTGTGGGATTACAGACCTGAGCCACAGCACCCGGCCTTGGTGGTGGTCTTATTGAAGGGGAAACGCTTTTTGAAATCAA TAGGATGAAGTTTTTTTAAAAACAATGAAGTCTTAAATCATTAGATTTTTAAGTGGGGTCTGGAGGTGGAAGACAGCTTATTTCTGCTGTGTAACATTTA GTACTTAACCATAACATAATTATCAATGCAAGTTTTTTGTCCTAGGTGCAAGATTATATTTTATTTGAGAGTATCAGGTGAACAAGTTTACATTTAAAGGCG | –                             | STR (10-bp);<br>Cruciform (6-bp, 1-bp)                                                   |
| 100206 distal     | AACATGATGAAACCCCTGTCTCTACAAAAATACAAAAATTTGGCTGGGCATGGTGGCGCACGCTGTATTTCAGCTACTTGGGAGGCAGAGGTGGGAGGA CTGCTTGAAGTGTGGGAGGTTGAGGTTGCAGTGAGCTGTGATCATGCCACTGACTCCAACCTGGGTACAGAGCAAGACTGTGTCTCTAAATAAAGAAGG CAAGAAAAACAATTTGATGAAGAAGAAAAATAATTAGTGATTTATGTATGCTTTTGTATTATTGCTCATCCCAATATTACTGGCCCATCAACAGAGTTTA    | <i>AluJb</i>                  | –                                                                                        |
| D1008345 proximal | CCATGGAGGCAGCAGTGGAACTTTATTTTTGAAAGTTTATGTAAAGGCCGGTTGCCGTAGCTCACACCTATAATCCCAGCACTTTGGGAGGCAGAAAGTGG GCAGATTGCTTGAACCCAGGAGTTAAGCATCCTGGGCAACATGGCGAAAACCTGTCTCTACAAAAACACGAAAATGAGCTAGGCATGATGGCCTGTGCC TGTAGTCCCAGCTACTTGGGAGGATTGCTTGAAGCCAGTAAAGTGCAGGCTGCAGTGAGCCATGATTGCACCCTGAGCTCCAGCCTGTGCGACAGAGTGA  | <i>AluJb</i>                  | –                                                                                        |
| D1008345 distal   | ACCTTTGTCTTCTACATGGGAAATTAACCCCTGAGTTAACATTCTAGCTATTTCCCTAGACATTTAATAAAGGTCACCTATCTTATCAAGATTGCTTTT GTTAAAAATGACGCCTGATTGGTAACACACCTGGAATAGAAGGTCAGCAATGGTGGCAGCAATTTGCGCTTGGGCTTCCCTGAAACATGTGACTCCTAAA ATTGAGCATGACCTTCTAGGATCTGTAGAAGCCATGCCCATCCATGGGGCTTCAACACAGACTGGATCCCTACCTACTGATATGATCTCATCTCCTC      | LTR87                         | Cruciform (6-bp, 0-bp)                                                                   |
| D0801587 proximal | GAGACGGAGTCTCGCTCTGTGCCCAGGATGAGTGCAGTGGCAACATCTCGGCTCGCTGCAACCTCTGCCTGTCCTGTCATATGCCATTTCTCCTGCTCA GCCTCCCAAGTAGCTGGGACTACAGGCGCCGCCACTATGCCTGGCTAAATTTTTGTATTTTTATTAGAGACGGGGTTTACCCTGTTAGCCAGGATGGT CTTGATCTCCTGACCTCTGTATCTGCCCGCTTGGCCTCCCAAAGTGTGGGATTACAGGCGTGAGCCACTGCCCTGTGATTTGGATTTATATATCT          | <i>AluY</i>                   | –                                                                                        |
| D0801587 distal   | ACTGCAAGCTCTGCCTCCAGGTTACGCCATTTCTCTGCCTCAGCCTCCCAAGTAGCTGGGACTACAGGCGCCACCATCAC TCTGGCTAAATTTTTTT TTTGTATTTTTTAGTAGACGGGGTTTACCCTGCTTAGCCAGGATGGTCTGATCTCCTGACCTTGTGATCCACCCGCTTGGCCTCCCAAAGTGTGG ATTACAGGCGTGAGCCACCGCCTGGCCAGATTTTTTTAAAGGTGCTTATTATGATAGGTGGACCTCAGTTTCTTATCTGTAATAATAGAGGTACATAC           | <i>AluY</i>                   | IR (10-bp, 41-bp);<br>Polypyrimidine tract (10-bp)                                       |
| 1106 proximal     | TGAGGAAGAAAGTGCAGGAGCCGGATGCAGTGGCTCACGCTGTAAATCCAGCACTTTGGGAGATGGAGGTGGGAGGATCGCTTGGAGGTAGGGGTTCCGA GACCACATCTTTACAAAAATTTAAATTAGGCCAGGCACAGTTGCTGACCGCTGTAATCCAGCACTTTGGGAAGCCAAGGCAGCAGATCACTTGAGGC CAGGAGTTCGAGACCAGCTGGCCAAACATGGCAAACCCCATCTCTACTAAAAATACAAAAATTAGCCACGAGGGTGGTGCACACCTGTAATCCAGCT        | <i>AluSz6</i>                 | –                                                                                        |

|                   |                                                                                                                                                                                                                                                                                                                     |        |                                                                                |
|-------------------|---------------------------------------------------------------------------------------------------------------------------------------------------------------------------------------------------------------------------------------------------------------------------------------------------------------------|--------|--------------------------------------------------------------------------------|
| 1106 distal       | AAAGCCATGTTCTCTCTTGCCTCTGAGTGTATCTTTCTCCTAGGATGTCCTCCCTCCCGCTTCCCTGTGCAGGAGCTAACGTCTACTCACCTTTTTAAGA<br>CTTACTTGGCCGGGAGTGGTGGCTCATGCCTGTAATCCCAGCACTTTGGGAGCTGAGGTGGGAGGATTACTTGAGCCCAGGAGTTTGAGACCAGCCTGGA<br>CAATATAGTGAGACTGCTTCTCTTAAAAAATTTTTACTTAGTACCGCCTCCTCCAGGAAGCCTCCCTGACTCCTTCTGCCCCAGCCAAAGGAGA      | FLAM_C | Polypurine tract (10-bp)                                                       |
| 619 proximal      | AAATCCAGATTGTGGGACAACCTTACAAGACAATCTTTGACTCTTAAAAAATGCCAATGTCATGAAAGATCAAAAAAGTAGAGGCATGTTTTAGATT<br>AAAGGAAATGAAGACATGACATGCAGTGCCTGATCTTTGACTGGATTCTGTAGTATTCTTTTCATCTTTCTGCATGTTTGAATTTTTTCAAATAATAAAT<br>TTGGGCAAAAGAGATAACCAAGATAATTGATTAATTTATTGTTATGGCTTCTTTGGGGCAGTTTCAGAGAAATAAAAACAATCTCTGTAAGTGGATAAAA   | L1MC4  | -                                                                              |
| 619 distal        | TTCTCAAATAAATATGTGGCCTGCAGGCGTACAGAGGCAAGTCTATGGTTTTGGCTAGAAGGGAACTAAATTCAGCTCCCTCTCTGCTGCTGCTCCTGCC<br>ACTGATGAAAAGTGTCTTCCCAACAGGAAGAATGAATGAGCCTTGGGGCCTGGTGTAGCAGTGTGTGAACCTGGCTAGGTCTCCTCAACCCCTGAAGG<br>TGAGGCCCTGCTCAAAGCTTCTGTATTCCTGTTAAGTTCAATGTTTTCTGCAGACACAAGCCAATTAGCTGTCTGCTGCTGGCCGGTGGTTTTATCAAC   | -      | STR (11-bp)                                                                    |
| 659 proximal      | AGCGTCCCCACCCACCCGATAAGCCTCCCACCAAGTGTGGTCTCCCTGCTGAGGGAGTACCTCAAGGGCCCGGGCTGGGTGGCCGAGAAGTTTTGGA<br>CACACAATTAGCCGGGGTAGTGGCGGGCACCTTTAGTCCCAGCTACTCGGAGGCTGAGGCAGGAGAATGGCGTTATCCAGGGGGTGGAGCTTGCAGT<br>GAGCAGAGATCACGCCACTGCCTCCAGCCTGGGCGACACAGTGTAGCTCCATCTCAAACAAAAAAGAGTGTCTTATAGATTCTAGATAACAAT             | AluY   | Cruciform (6-bp, 4-bp);<br>Polypurine tract (12-bp)                            |
| 659 distal        | GGCGCAGTGGCTCACACCTGTAATGCCAGTCTTTGGGAGGCCAAGGCGGGTGGATCACCTCAAGGTTGGGAGTTCAAGACCAGCCTGACCAACATGGGG<br>AAACGGTGGTGCATGCATCCCAGCTACTCTGGAGGCTGAGGCAGGAGAACTGCTTGAACCAAGGAGGTGGAGTTGTGGTGGCCAAAGATCATGTCAATTG<br>CACTCCAGCCTGGGCGACAAGAGCGAAACTCCATCTCAAAAAACAACAAAAACAACCAAGGTCAGATAACATAGCCAGTGTAAACCAATTAATAA      | AluSp  | -                                                                              |
| R84329 proximal   | GTGATCCACCCGCTTGGCCTCCCAAAGTGTGGGATTACAGGTGTGAGCCACCGCCCGGCTTTTTTTTTTTTTTTTTTTTGGAGACAGAGTCTCA<br>TGTCGCCAGGCTGGAGTGTAGTGGTGCATCTTGGCTGACTGCAACTCGAGGCTCAAGAGATTGCTGCGCAGCCTCCCTAGTAGCTGG<br>GATTATATGCATGCCCTACCACGTCCAATAAATTTTTATATTTTTTAGTAGAGACAGGGTTTCCACATGTTGGCCAGGCTGGTGTCAAACCTCTGACCTCA                  | AluSz  | Polypyrimidine tract (19-bp);<br>Cruciform (6-bp, 3-bp)                        |
| R84329 distal     | TTACAGGTACGTGCTACCGTGCCTGGCTAATTTTTGTATTTTTTAGTAGAGATGGGTTCCACCATGTTGACCAGGCTGATCTCAAACCTCCAACTCAAG<br>TAATCCACCCGCTCAGCCTCCCAAAGTGTAGGATTACAGGCATGAGCTACCGCGCTCGGCCCTACACCTGTTTTAATCTTTATTTAACTAATTAATCT<br>GATAAGGCTGATGCTTTTCCATAAGTTAACTACAAGTGTATTTCCCTTTGTGACTTTCAGTTTCAATGATTTGGCCATTTTTCTTTTTAGTTTTCA       | AluSz  | -                                                                              |
| 2535 proximal     | ACTTGTCTTTTCAAGTGTCTCATACTTGAATGTAAACAGGTCACTAATTTTTAAAGTTGCCAAATAGAAAGAAATGGGCAAAGGAAACAATAAGAAAT<br>TTACAAAATAGATATATATGGTCTTAAACAATTAACAAGATAAAACAATCTGAATTAAGTACACTGAGATGCGTTTTTTTCACTTATCAGATTGACAG<br>AGACCAAAAACCTTGATAAAGCACTTGATCAGGCTGTGGGGAAAGGTCTCCACATACATTACAGATAGGAGGGTGCATTGGATTGTAGGTATCAAATGT     | L1Mc   | -                                                                              |
| 2535 distal       | CTGAATGATCAGAGAGCAGTATGGCCAGGAATGGAAGGAGTTAAGTAGGAAGCACTCATTCTGCAATGCCTTATCTGAGAAAATAGGGATATTTATTT<br>ACTTGCAAAAGCTCCTTGTAGTCTTTTGAAGGATGCTTGGCTTGAAGGATGCTAGCTTGAAGGCTTTGAAAGTCTTTAAGACTCAGATTTCCAAACTTTTATTA<br>AAGCCATGCTTCTCTGAAAAACTCTGTATGTAACAAGAGTTTCCAGAATATAACAAGTTCCCAATCTGTTTGGGAGTTTTATGGTGAAGTCAATGTC | -      | -                                                                              |
| 08D2261 proximal  | GGGCTGTGCGCGGTGGTTCATGCCTGTAATCCCAGCACTTTAGGAGGCTGAGGTGGGTGGATCACGAGGGAAGGGTTTAAAGACCAGCCTGGCCAAAGATG<br>CTGAAACCCGCTCTACTAAAATAACAAAAATAGCCGGGCATGGTGGCAGCGCCTGTAATCCCAGCTACTCGGGAGGCTGAGGCAGGAGAATCGCTTG<br>AACCTGGGCAGCAGAGATTATGGTGAAGTGGAGATTGCACCCTGCCTCCAGCCTGGGTTGCAACAGAGCAAGACTCCATCTCAAATAAATAAATAAATA   | AluSg  | STR (17-bp)                                                                    |
| 08D2261 distal    | CAGATGTCTGCCACCACACCCAGCCAATTTTTTTATTTTTTTGTAGAGATGGGGTCTCACTCTGTTGCCAGGTTGGTCTCCAACCTTTGTACAACCTCAAG<br>CGATCTTCCACTTTGGCCTCCAAAGTCTGGGATTACAGGCATAAGCAACACACAGGCTATTTTTGTGCATTTTAAACA CAATTTGTTAAAGTGGTAA<br>ATTTATGTTATGTATATTTTATCACAATTTAAGGAAAAAAGAGGAGAAAGAAAGAGAGACTCTTAGGCCCTGGGAAGAGGAAACAG               | AluJr  | Cruciform (8-bp, 4-bp);<br>Cruciform (7-bp, 4-bp);<br>Polypurine tract (10-bp) |
| D06.1047 proximal | GCTGGGATTACAGGCGCACACCATTGCCTGGCTAGTTTTTTGTATTTTTTAGTAGACAGGGTTCACCATCTTGGCCAGGTGGTCTTGAATTTCCGACC<br>TCGTGATCCACCACCTCACCTCCCAAAGTGTGGGATTACAGGCGTGAACCCACCGCCCGGCTTATTTATTTATTTTGGAGATGGGATTTCACTCT<br>ATTGCTCAGGTTGAAGTGAATGGTGTGATCTCGCTCACTGCAACCTCCACCTCCCGGTTCAAGTGAATCCCTGCCTCAGCCTCCCAAGTGTAGTGGG          | AluSg7 | STR (13-bp)                                                                    |
| D06.1047 distal   | CACACATGCCGACCACTCTCAGTTAAGCTTTGATTTTTTTGTAGAGACGGGCTTCAACCATGTTGCCAGGCTTGTCTCGAACCTCTGAGCTCAAGCGA<br>TCCGCCCCCTCAGCCTCCCAAAGTGTGGAATTACAGGCGTGGCCACCTGCTGGCCCTAGTACATTTCTTTTAGGATTTTGTACCAGAAAAGAAAGT<br>CCTTCTGATGAAATGATACCTTTTTACATCAGATAACAAGAGTTACAGCATAACTATCCCTTGCTGTCTTTTTGGTTTTGGTAAAGTCAAAAACCTTA        | AluJb  | -                                                                              |
| D05.2678 proximal | GGCCACCACACCCAGCTAACTTTTGTATTTTTTAGCAGAGATGGGGTTTCCACATGTTGGCCAGGATGGTCTCAACCTCCTGACCTCGTGTATCCGCCCGG<br>TTGGCCTCCCAAAAAGTGGGATTACAGGTGTAGCCACCGTGGCCCTGATTTTTTTTATTTTATTTTAGTAGAGACGGGGTTTTGGCATGTTGGCCAG<br>GCTGGTCTTGAACCTCTGACCTCAGCTGATCTGCCTGCCTCGGCCCTCCGAAAGTGTGAGATTACAGGCATGAGCCACTGTGCCAGCCTGTTCTTTTT    | AluSx  | -                                                                              |
| D05.2678 distal   | GAGCTGAATGGAGAGGAAGCTGGAAGGCTGTGCCCTTAGGTGACTCACCTACTCTGGCTAAAAGCTTGTGCCAACATGCCTTACCCTTGGTTAGG<br>GCTGGGACCACTTCTCGGGGAGTCACTTCTGAAAGTCCCTGGGAGTGGCTGTGGAGTCTGGGTAAAATGGAACATAGTTCTCTGGGACCCAGCCAGCTT<br>GGTGAATCACACAGTGTAGGATTCTAGGCCTGCATCAGTCTGACTTGTCTGGGAGGGTGCATATAGCCTAGCCTATTTAGTGCCTGAGGGAAGGG           | -      | -                                                                              |

|                   |                                                                                                                                                                                                                                                                                                                     |               |                                                     |
|-------------------|---------------------------------------------------------------------------------------------------------------------------------------------------------------------------------------------------------------------------------------------------------------------------------------------------------------------|---------------|-----------------------------------------------------|
| R48018 proximal   | GGGTGACAGAGCGAGACTCCGTCTCAAAAAAAAAAATCCTTTCTCACAAGAAACACTAGTATAATAATGGCTGGTGGCTGGGCCATTACTCATACCTGTAATCTCAGCACTGGGAGGCCAGGGCGGGTGGATCACCTGAGGTGAGGAGTTCTAGACCAGCCTGGTCAATGTGGTGAACCTCATCTTTACTAAAAATAGGAAAAATTAACCTGGCATGGTGGCGGGCACCTGTAATCCCTGCTACTCAGAGACTGAGGCAGGAGAATCACTGAACCCAGGTGGGAGGTTGCAGTGAG            | <i>AluSx1</i> | Polypurine tract (11-bp);<br>Cruciform (6-bp, 1-bp) |
| R48018 distal     | TAGTATACTATGCAACTATTTAAAGAAAGTAAGGAGTGTGTATCTAATGGGATGGAAATAGGCTTAATTTACATTGCTTAATTTTAGAAAGGCAAGTTGCAGAACAGTATATTGAATAATCCATTTTAAATATGTGTATGTGTATGTGTCATAAAAAAAAAAGAAAGAAAAGCAGCCAGGCACTGTGGCTCAAGCCTGTAATCCTAGCACTTTGGGAGGCTTAGTGGGGTGGATCACCAGGTGAGGTTCAAGACCAGCCTAGCCCAAGATGGTGAACCCCTCTCTACTAAAAATA             | L1MC4A        | STR (19-bp);<br>Polypurine tract (11-bp)            |
| Ak-47055 proximal | TACATTTCTTTTTGCATACTTACTCTTGAAGGTGCCTCATCAGTTGCCATTTGAGCATATCTGATTCTTAAAAATTTGAATATTCAA GAACAAATTGTAA<br>AAATATTCCTTGATAATTTTTTTGGTTTTGTAGTAATTCCTTTGTTTTCTCACAGTACTTCTGCAGAGTGATCCATTTGTAATTAATAGACACACACA<br>CATCATCCACCATTTCAGCTTTATCTTCTCATTAGAAAGTGCCTTAACCCCTATATTTTGAGATCCTGGATTTCAGAATATTGGACTTGATGTAGACACG | –             | Cruciform (6-bp, 0-bp);<br>STR/Z-DNA (11-bp)        |
| Ak-47055 distal   | TGTTACACAAATAGTTCTATATTGCTTTCTTTTACAGCCTTGGTCTGCTCAAAAACCCACATTCAAATTTGGATCACATAAACTCCAGCCCTTAAGCAC<br>ACAGGTATTGTAGGCTAGAGGCCGCTTTTGGCTACAAACCCCTTATTCATTTAAAATAACTTTCATTACAAAGGTTTCATTGAACAGCTGGTTTGTGCCCA<br>TCACAGGCCCTGACAAAACACTTCGCCTAATTGTCACTAATCCTTACAGCAACTCTGGTTGAGTGTTACTAGTATCATTTAACAGATAAGCAAACCAAG | –             | –                                                   |

STR (yellow): short tandem repeats of 2–6-bp that are repeated several times. A subtype of STR may also represent Z-DNA. Z-DNA is characterized by five or more tandem repeats, each comprising an alternating pyrimidine–purine dinucleotide motif (Wang et al., 1981; Cer et al., 2011).

Polypurine tract (yellow): poly-A or poly-G tracts.

Polypyrimidine tract (yellow): poly-C or poly-T tracts.

IR (green): inverted repeat of  $\geq 6$ -bp separated by  $\leq 100$ -bp.

Cruciform (green): A subtype of IR of  $\geq 6$ -bp in length separated by 0–4-bp.



|    |                                                                                                                                                                                                                                                                                                                                                                                |               |                                                                           |
|----|--------------------------------------------------------------------------------------------------------------------------------------------------------------------------------------------------------------------------------------------------------------------------------------------------------------------------------------------------------------------------------|---------------|---------------------------------------------------------------------------|
| 11 | GGTGCACACCACCATGTCCGGCTAATTTTTTGTATTTTTTGTAGAGACTGGGCTTCACCATATCTCAGATCTTTAACTCCTGAGCTCAAGCAATCTTCTC<br>GTCTCAGCCTCTCAAAGTGCTAGGACTATAGGCGTGAGACTGCGCCTGGGCTCCCTCTTTCTTTATTGAAACCATGTGTCTGTATTTCCAGTCTG<br>ATATAAAAAAGTCTGCCTCCTTTGAAGAAATGGCATGTTTTTAAATCAATGCCAAAGATAAAACATTCAGATTCAGTAAGTCTCCCAACCCATACATC                                                                  | <i>AluJb</i>  | -                                                                         |
| 12 | ATTCATAATAACCAAGAGA <b>TAATTAACATACAG</b> TATACAGAACCCCATTAATTTTTTAGGGTCTGCATATATT <b>CTGTATGTAAATTA</b> GCCACCCAATA<br>GAAAAATGGGTAAAAGACATAAATAAGCGTTCTACAGGAGAAGAAACATAAATAGCCAAAAATGTATATTATGAATATTCAC <b>ACCTAATTTGTACCTAAT</b><br><b>TGTA</b> ATATGGCAAATACGATCTAAAACCACAACAAGGCCAGACATGATGGCTCATGCTATAATCCCTAACACTTTGAGAGGCCGAAGCGGGTGGAGCACT                           | L1M5          | IR (14-bp, 42-bp);<br>Slipped motif (11-bp, 0-bp)                         |
| 13 | TGAGCCAGGAATTTGAGGCCAGCCTAGGCAACACAGCAAAACCCCATCTCTACAAAAAATTACAAAACCTTAGCTGGCTGTGGAAGCACATGCCTGAAGT<br>CCCAATTACTTGGGGCTGAGGCGGAGGATCACTTGAGCCAGGAGAT <b>TC</b> GAGACTGGAGACATGATGTGCCACTGTACTCCAGCTGGGTGACAGAG <b>T</b><br><b>GAGAC</b> CCT <b>GTCTCA</b> AAAACAAAATAAATAAAACCACAACAAGGTACATTTAGGCAAAAATATAAAGTCTCACAAATGCCAATTTGGTCAAGATATG                                 | <i>AluJo</i>  | Cruciform (6-bp, 3-bp)                                                    |
| 14 | GAATAACAGAACTCATATACTCCTTGAAGGCTAAATTTGATAGAATCATCTTGTGAAAGTTTGTATTACCTATCAGCGTATGGATCCAATCTCTAA<br>GAAGACCTCATAATTTTACACCTAGGT <b>AAATATTAATATT</b> TACAAACT <b>TC</b> ACATATGTCCATAAAGAAACACAAGTAAAAATACTTATAGCAAAAAACT<br>GGAATAACTAGGTCCACTGATAGGAAAAATAAAAAATGGAATGACAGTCTGTGTAGAAAAATAACAACAGCATGTTTATAAAAAAAGAAAAAAAT                                                   | L1M5          | Cruciform (7-bp, 0-bp)                                                    |
| 15 | TCCTTTTAAATAAAATCTCAGCTGGGCACAGTGGCTCACACCTTCCAGCACTTTGGGAGGCCGAGGTGGGCAGATCACTGAGGTGGGAGTTGA<br>GACCAACCTGACCAACATGGAGAACTCTGTCTC <b>TACTAAAAATACAAA</b> <b>AA</b> <b>TACTAAAAATACAAA</b> CTTAGCCAGGTGTGGTGGCGCATGCCTTAATCCC<br>AGCTACTTGGGAGGCTGAGGCAGGAGGATTGCTTGAACCCGGGAGAGCGGAGTTGTGGTGGCCAAAGATCGTGCCATTGTATTCCAGCCTGAACAACAAC                                          | <i>AluSp</i>  | DR (15-bp, 2-bp)                                                          |
| 16 | AACGAACTCTGTCTC <b>AAAAAAAAAAAAAAAA</b> GAAAAATGTGAGCCAGGCGGAGTGGCTCACACCTGTAATCCAGCACTTTGGGAGGCCAAGGTGGGCAGA<br>TCACCTAGGTCGGAGTTGCATCGCTGCACCTCAGCTGGCGACACAG <b>CA</b> AGGCTTCATTT <b>AAAAAAAAAAAA</b> GGCCAGGCACGGCGGCTCACACCTATA<br>ATCCCAGCACTTTGGGTGGCCGAGGCGAGTGGGTCACTGAGGTGAGGAGTTCAAGAACAGCCTGGCCAACATGGTGAACCTCGTCTCTACAAAAATA                                     | FLAM_C        | Polypurine tract (15-bp);<br>Polypurine tract (10-bp)                     |
| 17 | CAAAAATTAGGCAGGTGTGATGGCAGGTGCCTATAATCCAGCTACTCAGGAGGCCAAGCAGGAGAATGGCTTGAACCCGGGGGAAGCGGCAGGCGGG<br>GAGGGCATGGAGGTTGAGTAAGCCGAGATCAGCCACTTCACTCCAGC <b>CT</b> CGGTGAAAGAGCAAAACTCTGTCTCAAAA <b>AAATAAATAAATAA</b> AAAAA<br>ATAAACTGGAAGACTACCTCAGTGTCCATGTGACTTCATTTAACTGTAAGTAAAAGAGATTTTGTTTGAGAAGAAAAGAAATGATTTTAAAAGTA                                                    | <i>AluSx1</i> | STR (15-bp)                                                               |
| 18 | GTCAAAGAAAAATCTGAAAGCCCTCAAATCGCAAACCCATAATGTGGAAGTCAATTTACTATAGAATTCTGAATACCTTACACCATCTACAATGAT<br>GCCTCCAGGTTTCTCTATTAGTTCTTCTATCTGTACTGGTGGCGAGAT <b>GC</b> TACTGTTCATGCTTAAAAATGTGGTCTTTCACTATGTTAAGAATTGAG<br>TCATCCAACTGAGCAGATAAAACAAGGCACATCAACCAGTAAAGGTACTTCTGGTAAGCTGAGGAAAACAAGCTCATGTGTTATGAGACCTCTAACTGAGA                                                       | -             | -                                                                         |
| 19 | GTAAAAAATACAAGAAATATTTAGAGCAGTCACATGCTTGAAGAGTCCCTGAAGCCCCAGTAATTAATTTCTATGGCAGTAGGGGATTTGCAAGATGT<br>TACACAAGATTCTCTTTTCAATAAATAAATAAAGTAAGTAAAGACAGAAAAATGG <b>TA</b> GATCATATAACTGTCCAGTTTAAAGCCAAAAGATCTGGTTACTGGAATAT<br>GACTCCATTTCAACAATACATTGATAATTTCTAAAAATTTAACAATTTCTTTTATATATTGGATTGAAAAAATGTGTAGTAATACTATACCAAGGATTATAA                                           | -             | -                                                                         |
| 20 | TCACAATATTTTCAATTAGTAAACAGTGGTAATGGCAGTGAACCG <b>TTTTTTTTTTTTTTTT</b> <b>CA</b> <b>GACAGAGT</b> <b>CTC</b> <b>ACTCTGTG</b> CCCTAGGCTGGAGTGTCTG<br>TGGTGCATCTCAGCTCACTGCAACCTCCACCTCCCCGATTCAAGCGACT <b>TC</b> CTGTGCTCAGCCTCTCGAGTAGCTGGGACTTACAGGCGCACGCCACCA<br>TGCCCGGATAAATTTTATTTTATTTTAT <b>ACT</b> TATTTTGGAGTGGAGTCTTGTCTTGGCCAGGCTGGAGTGTAGTGGTACAAAATTTGGCTCACTGCAAC | <i>AluSz6</i> | Polypyrimidine tract (16-bp);<br>Cruciform (8-bp, 3-bp);<br>STR (16-bp)   |
| 21 | ATCTGCCTCCTGGGTTCAAGCAATCTCCTGTCTCAGCCTCCCCAAGTAGCTGGATTACAGGTCCATGCCCGTCTAATTTTTTATATTTTTTAGTAGAGACA<br>GGGTTTCAACATGTTGGCCAGGCTGGTCTCAAACCTCTGGCTCAAGCA <b>AT</b> CCACCCGCTTGGCTCCCAACGTGCTGGGATTACAGGTGTAACACCAC<br>ACGCATGGTCTGAAAACCTTGAATATATATTTCTCTATCTCCCTTAATGAGAATCTTGAACAGAGGGAGGAAAAAGCAGACATAGTTTAAATGCTTAAA                                                     | <i>AluSz</i>  | -                                                                         |
| 22 | AGTAAGTCAAAAAGGCACAACTCTTTTACCTGTCCAACCTGAATGTGGGAGGCTTTTGGTAAAGTCCACAGTTTCTCATTTCTTCTCCACACCAC<br>CAAGCATGGCGATTTACCTCAACATCAAGAAATAAGAGAACTAGAACAAT <b>CA</b> AAATGGTCAATATAAAGTAATCAACACAACCTCATGTCTGGGTGGGTCT<br>CTAGCGTTCTTGCAAAATAGTTCTTAAAGTATGCCACAGTCAAATCCCAAAGTTAAAGTAGAACTATTTAGACGTGACTTAAGATCAAATCCAA                                                            | -             | -                                                                         |
| 23 | GAGGAAAAGGGATATAAG <b>TGGCAA</b> CATT <b>TGGCA</b> GAGATGATAAATCTATCTACTCTATAACAAGGAAATCAACCAATTTTAGGCAAGCAGAAAGCCCA<br>GGGACTTCTTTCCATCTCTCTACAGAATCATTATGAACTTCAATAGGA <b>GC</b> CAGTACAAAATATTGCCCTGAGAGGTGCAACAGGGGATAGGGT <b>TTTTT</b><br><b>TTTTTTTTTTTT</b> GAGACTGGGTCTTGTCTGTCACTCATGCTGGAGCACAGTGGTAGGATCATAACTCACTGCAGCCTTGAACCTCCAGGTTCAAGCAAT                     | -             | Cruciform (6-bp, 4-bp);<br>Polypyrimidine tract (17-bp)                   |
| 24 | CCTCCACTCTCAGCTCCCAAGTAGCTGTGAC <b>CACACGTGCAGC</b> CACCATGCCAGCTA <b>TTTTTTTTTTTTTTTTTT</b> TGGTAGAGATGAGGTCTCACTA<br>TGT <b>TGCCAGC</b> <b>CTGGGCA</b> TAAGCCTTGAAGGCCAAATGATGCATCTAT <b>GT</b> TTTCCATAAAGAGTATCATATATCAGATTACAAATATTCACAGAAC<br>ATAAAAAGAAAATGTCAGGCTGGGTGGGTAGCTCACGCCTGTAATCCAGCACTTTGGGAGGCCGAGGAGGTGGATCACGAGGTCAGGAGATCAAGAC                          | -             | Z-DNA (13-bp);<br>Polypyrimidine tract (19-bp);<br>Cruciform (7-bp, 1-bp) |
| 25 | CATCCTGGCCAACATGGTGAACCCCTGTCTCTACTAAAAATACAAAATTAGTTGGGTGTGGTGGCAGGTGCCTGTATTCCAGCTACTAGGGAGGCTGA<br>GGCAGGAGAATCACTTGAATCCGGGACATGGAGGTTGCAGTGAAGCGAG <b>AT</b> CAGCCACTGCACTCCAGCCTGGGCAAAAGAGCGAGACTCCGTCACCC<br>CGCC <b>AAAAAAAAAA</b> GTTACATAGAGGCATATGATATGAAAAATGACCAACTTGTATGTCTTCCACAGCCCTGAAGAACACTGCCAGAACTCTTTTCCATC                                             | <i>AluSc8</i> | Polypurine tract (10-bp)                                                  |

|    |                                                                                                                                                                                                                                                                                                                   |        |                                                                                  |
|----|-------------------------------------------------------------------------------------------------------------------------------------------------------------------------------------------------------------------------------------------------------------------------------------------------------------------|--------|----------------------------------------------------------------------------------|
| 26 | TAAATGTGCCCTGTAGTTACTCAAGTTTTTTGAGACCATATGACCTTCTCCTTCACCAAAGAAAAACAGAGACATGGCCGGGTACTGTGGCTCATGCC<br>ATAATCTCAGCAGCTTTGGCAGGCTGAGGCTGGTGGGTACCTGGGGTTGGAGTTGCAAGACTAGCTTGGCCAAACATGATGAAACCCCGTCTCTACTAAAA<br>ATACAAAAAGTAGCTGGCCAGCTAGTGGCAGCTCTCTGTAGTTCTAGCTAGGAGGCTGAGCAGTAAATCGCTTGAACCCGAGAGGTGGAGGTGCA    | AluSx  | -                                                                                |
| 27 | GTGAGCCAAAGTCGTGCCACTGCACTCCAGCTGGGCAACAGTGTGAGACTCTGTCTCAAAAATAAGTAAATAAATAAATATCCTCAAATTCATA<br>AGTAAGTTTCTATCCCTCAGGAGAATAGGAAAGAGTTTGACATTAATAATTTTCCTAAAGTTTCTCTGCTGCTGAGATGTATAATAATTTTTTTAAAT<br>TAAAAAATCATAGGCCAGGCACAGTGGCTCACGCCGTAAATCCAGCAGCTTTGGGAGGCCAGGTGGGCAAAATCACAGAGTCAAGAGTGTCTAGACCAGCCT    | -      | Cruciform (6-bp, 3-bp);<br>STR (16-bp);<br>Cruciform (8-bp, 0-bp)                |
| 28 | GGCCAAATCGTTGAACTCTGTCTCTATTAATAAATACAAAAATTTGCTGGGCGTGGTGGCGGGCGCTATAATCCAGCTACTCGGGAGGCTGAGGCAG<br>GAAAATCGCTTGAACCTGCGAGGCGTAGGCTGCAGCAAGCTGAGATCGTGCCTGCACTCCAGCCAGGCAACAGTGCACACGCCATCTCAAATAA<br>ATAAGTTAATTAATAAATTAATTAATTTTGGACATACAAAAATATCAAGTATCAAATGCTGTAAACACTCACACTGCCTCAAAGGGATTTTTCTTTTTGAG      | AluSx3 | Cruciform (6-bp, 0-bp)/STR (12-bp);<br>Cruciform (6-bp, 1-bp) (underlined)       |
| 29 | ACAGAGTCTCACTCTGTCCACCCAGGCTGGAGTGTGATGTATAATCACAGCTCACTGCAACCTCAAACCTCTGGGGCTCAGGGGATCCTCCCGCCTCAGCCT<br>CCCAAGTAGCTAGGACTACAGGAATGTGCCATATGCCAGCCAGGATTTATCTTTTTTTTTTTTTGAGATGGAGTCTTGCTCTTGTGCGCCAGACTGGA<br>GTGCAATGGTGAATCTCAGCTCACTGCAACCTCTTGCCTCAGCCTCCCGAGTAGCTAGGATTACAGGTGCCACCACCATGCCAGCTAATTTTTGTAT | AluSq2 | Cruciform (7-bp, 3-bp);<br>Polypyrimidine tract (13-bp)                          |
| 30 | TTTTAGTAGAGCCGGGTTCCACATGTTGGCCAGGCTGGTCTTGAACCTGCACCTCAGATGATCCGCCCTCGGCCTCCCAAAGTGTGTGATTAC<br>AGGCACGAGCCACCGCCCGCCAGGATTTATCTTAAAATAAAAAACAATGATCAGCTCCTCAGGGTGAATGAGTGTACACTCTGGCCCGTGGTGCAC<br>TGCTTCTGGGTTTGTTCCAAATGCAAAGCCACCAAGGAAAGACATTTATGGTACTGCTAGAATTTCTCAAAGTACTGTTATGGTCACTGGCAAATA             | -      | Cruciform (6-bp, 0-bp)                                                           |
| 31 | AACACTTCTCATGAAAGACAAGACAAAAATGTAAACGCAATGTCAAGATAACACCATACTATATCTAAGTGGGACCAAAGAAGATTAACTTCCAGG<br>TGGAGTGACAGCCATGTGAATCATCCAGCCTTTTTCCACACCACCTCCAGCATTCTGCAGAAAGAGATGGAATTCAGTCTCCTTCCCTAGCTCCT<br>TTTTCTCAAATGACTTTTTAAATGTTGGTGACCTTAGCCTTAACTTTCATCTCTCTCACATTACACGGTGTCCCTTGATGATTTGATCTTA                | -      | -                                                                                |
| 32 | TTCCAATAGATTGAGTTTGTATATATGCCATTAATGCCATACTGACATCTCCTGGTATGATCTCTCTCCTAAGAAATCATACCCGATTTTCCATCTTA<br>AGCACCTCAAACCTACCATGCCAAGCCAAATGCCTAACTAGTACTAAGCCACCCGCTTCTCCTCAATTCCTTTGTCAAACACAGCACCCTATTTAT<br>TCAGAATCCAAAAGTAGGCTGATTTTTGTTATACAAATCCTTTCCCTTCCCTCCATCACATATGTAGGTAATCATCTACAGATAACAGTCACTGCTCA      | -      | -                                                                                |
| 33 | GTAAAATCATCAATAAATCTACTTCTTAAAAAATAAAAAAATCTGTCTGTGTTTTTTGTTTTTATTTTTTAAGAGACAGGGTCTTGCTCTGTTGCCAGG<br>CTGGAGTGCAGTGTGCAATCATAGCTCAAGCTCTCCACCTCAGCCTCCTGAGTAGTGGGACAACCTGTGTGTGCCACCATGCCCTGGCTAAATTTTTTT<br>TTTTTTTTTTTTGAGACGGAGTCTCGCTCTGTGCGCCAGGCTGGAGTGCCATAGCACGATCTAGGCTCACTGCAAGCTCCGCTCCTGGGTTTACGCCAT | AluJb  | Polypurine tract (14-bp);<br>Polypyrimidine tract (19-bp)                        |
| 34 | TATCGTGCCTCAGCCTCCCGAGTAGCTGGGACTACAGGCGCCTGCCACCATGCTGGCTAAGTTTTTGTATTTAAGTAGAGATGGGGTTTCACTGTGTT<br>AGCCAGCATGGTCTTGATCTCTTGACCTTGTGATATGCCTGCCTCGGCCCTCCAAAGTGTGGGATTACAGGTGTGAGCCACTGTGCTCAGCAGCCCTAG<br>CTATTTTTTTTTTAAAAAATTAGAGACAATCTCACTACATGCCCCAGCTCCTTACCCTCAAATGATCCTCTCCTCTCTAGGCTCCC               | AluY   | IR (10-bp, 35-bp);<br>Cruciform (8-bp, 2-bp)                                     |
| 35 | AAAGTGTCTGGGATTACAGGTGTGAGCCATTGTGCCTGGCTCAAAATCTTAAAAATCAGCCCTGCCTCATCTTACCAGCCACCGCCTTTACCATTCTTA<br>CCTGGATTACTTTCTAATAACTTTTTTTTTGAGATGGGGTCTCATTATCTTGGCCAGGCTGGTCTTGAACCTCTGGGCTCAAGTGTACCACCCGCTCAG<br>CCTCCCAAAGTGTGGGATTACAAGCATGAACCACCGTGGCCAGTTCTAATAAATTTTTTTTTTATTTGAGAGCGAATCTCTGTTGCCAGGCTGG      | FLAM_C | Cruciform (6-bp, 3-bp)                                                           |
| 36 | AGTGTAGTGTGTGATCTTGGCTGACTGCAACCTTTGTCTCCAGGTTCAAGTATTCTCCTGCCTCAGCCTCCCGAGTAACTGGAATTACAGGTGCTCCA<br>CCACCAGTCTCGCTAAATTTTTGTATTTTTAGTAGAGATGGGGTTTTTACCAATGTTGGCCAGGTTAGTCTCAAACCTCCTGACCTCAAGTGTACTCCCATC<br>TTGACATCCCAAAGTGTGGGTTATAGGTGTAGCTGGCCTCGGCCCTAATAACTTTTTAATCAGTCTCTTTCCCTCTAGTCTTACAATCTCTAAC    | AluSx1 | STR (10-bp)                                                                      |
| 37 | ATAGTCTCAAATAGGCAGGGTCATTTTTTTTTAAATGCATCTGATCCTGTCACTCTGTGCTTAAATGCTTCAACTAATCCTTGAATATGCCATT<br>CACTCCACTTATGATAATGTTACTTCTGCTTGAATCATGCTGTACTCTCTTTTTTCTATGTCTGCTGGATGAATGCTTCAAGCCTCTGTGGAACCT<br>TTCCTACAGAAAGCTATCCCACTATTCAGACAAAAGTTAAGAATCTCTCCTATGCTCAATAAAGGCTTTGATCTCTTAGCATGTATCTCTCTCT              | L2c    | Polypyrimidine tract (10-bp)                                                     |
| 38 | CACTGGGCTCTGAATCCCAAAGGAAAGAACTCTCACCTATTTTATTCTTTCTTTTTTTTGGAGAGGAGTCTCACTCTGTCAACCAGGCTGGAGTGCAGT<br>GGTGCATCTCGGCTAACTGCAACCTCCGCCCTCCGGGTTCAAGCAATTTCTCTGCCTCAGCCTCCCGAGTAGCTAGGACTACAGGCATGCCTGCCACG<br>CCCGGCTATTTTTGTATTTTTAGTAGGGACGGGGTTTCCACATGTTGGCCAGGATGTTGATCTCTGACCTGATGATCCGCCCACCTCCACCTCCCA     | AluSc8 | -                                                                                |
| 39 | AAGTGTGGGATTACAGGCTGAGCCACCGCTGCCGCCCTTATTCTTGTAGTCTTATTTTATTTTTTTGAGACAGGGTCTTACTGTGCAACCAGGCTGG<br>AGTGCAGTGGTGAATCAGGCTCACTGCAAGTGTCAATCTCTGGCCTCAAGGATCCTCCCGCTCCGCTCTTAAAGTAGTTGGGACTCCAGGTGCATG<br>CCACCATGCCAGCTAAGTTTTTTTTTTTTGTAGCGACAGGCTGTTGCCAGGCTGGTCTTAAACTCCTGACCTCAAGTATCCTCACTGCTTCAAGCCTC       | AluJb  | Polypyrimidine tract (13-bp);<br>Cruciform (6-bp, 3-bp)                          |
| 40 | CCAAAGTGTCTGGGATTACAGGCGTGAAGCCACACCTGCCCCCTGTTTTATGTTATGTGCTGACAAAGATCTCTGTTGAAGGAAGGTGGTATAATGA<br>AGAAAGGAAGGCAGCAGGCAATGACTCAATGGAATAATGGCAAGATAGGAGTAAACCAATACATTTTTTTAAACTTCTAAATAAAAAAATGGA<br>GACTGTAATTTGGTGGCTTTTGCCTGTAATCCAGCAATTTGGGAGGCAAGATGAGAAGATTTGCTTGAGACCAGGAATTCGAGACCAGCTGGGCAAC           | -      | -                                                                                |
| 41 | ATGGTGAACCCCTGTCTCTACTAAAAATACTAAAAATTACAGGCATGGTGGGACGCGCCTGTAATCCAGCTATTTGGGAGGCTGAGGTGGGAGGATCA<br>CCTGAGCCAGGAGGTCAAGACTGCAGTGTGCTGACAGCACCAGTGCCTCAGCCTGGGCAACAGAGCAAAACCCCTGTGCTCAAAAAAATAATATAT<br>ATATATATATAATTTGATTGACTGTAAACAGAAATGAAATGCTTGAGAGAAATGGATACCCCATTTTTCCCAATGTGATTATTACACACCCGATGCCTGT    | AluJb  | Polypurine tract (10-bp);<br>Cruciform (8-bp, 0-bp);<br>STR (17-bp) (underlined) |



|    |                                                                                                                                                                                                                                                                                                                                                                                                                                                                                                                                                                                                                                                                                                                                                                                                                                                                                                                        |        |                                                                     |
|----|------------------------------------------------------------------------------------------------------------------------------------------------------------------------------------------------------------------------------------------------------------------------------------------------------------------------------------------------------------------------------------------------------------------------------------------------------------------------------------------------------------------------------------------------------------------------------------------------------------------------------------------------------------------------------------------------------------------------------------------------------------------------------------------------------------------------------------------------------------------------------------------------------------------------|--------|---------------------------------------------------------------------|
| 42 | ATCAAAACATCTCAATGTGCCCATATCATTATTCTTCTTGTGTTTATAACTAATTATAACTAACTTCAACTGCACTTGCCATGCGATACTTAACGGTATATCTGTCTACCTATATACAAACCTGTCTCTAGGTAAAGAACATTTAAAGAACCCACAGCTGGCAAGAAGCCCTGCTGATCTGAGAAATCAGCAAAATGTCAATCTGAACCAACCACATTTAACTCTGTGATATAAATTTGGCTCTGTGTGCCCCCAACTCTCATCTCGAATTTGTACTCCCATAATTTCCCATGTGTGTCAGGAGGGACCCCGTGGGAGATAAATGAATCATGGGGCAGTTTTCTCCCACACTGTTCTTGGTAGTGAATAACTCTCATGAGATCTAATGGTATTTTTAGGGGAAAACCCCTTTCGCTTGGCTCTCATTCTTCTCTTGTCTGCCGCATGTGAGATGTGCCCTTTCACCTGCCATGATTTGTGAGGCCCTCCCAGCCACATGGAACTGTAAGTTCATTAACCTCTTCTTTTGTAAATTGCCAGTTTCAGGTATGTCTTTATCAGCAGTGTGAAAATGGACGAATGCACATAATACAA                                                                                                                                                                                                                                                                                                     | -      | Slipped motif (10-bp, 0-bp);<br>Cruciform (6-bp, 4-bp) (underlined) |
| 43 | CAGGCTCCCTGGTCCCCACCTTCTCGGACTAAGTCTCTGCAGTGTGACTCCGTTCTATGAGCTTCTGGCAGTCACTAGTGGTAAATGGTCTCCGTTCATGGTGTCCACCTCTTGCAAAAGGGTCACCAATCGCTCATCCAGAGCTTCCCAAGGGTTCCTTTAAATCATTTAAAATGCCTTTGAGAACATCCCTTGTCTGTGATGCACCTTCTTTGTATCTAAAAGAAAATAACAAAATACTCAAATCAGAACTTTTAAAAAAGGCTAATCCAAAGGTATAATTACATGAATCTAAAAGCACTGTATAACCATCTTCTTCAATTTAGTAAAAAAAGATTAACCTGAAATTAATTTAAGGTGTGATATTTGATACACATATACATAGTGAACCTGTTAACTATAGTTAAAGTAATTAACATGTCCATCTCTTCCATGTTTACCTCTGTGTGGTGAGAACACTTATGATCTCTCCTAACACATTTCCAGTATACATTACACTATTATTAACATATTGTCCTATCTGTACTTGAGCTCTCTAGAATTTACACATATTAATAACTGAAACTCTGTACCCTTTGACCAACATCTCCCCATCCCCAATCCATCCCTGGCAAGCACCATTCTACTTTCTGTCTCTATGACTTCGACCTTTTTAGATTCTACATATGAGATCGTGAGTATGTTTATTTCTGTATCTGGCTTATTTCACTTAGCATAGTGTCTTCAGGTTTCATCCATGCTGTCAAAATGACAGAAATTTCCCTTCTCTTTTAAGGTTGAAATGGCATTCCATCTGATATATACATCTTCCATTCAATTGATAAACCAAAATGTGATTTCAATTTGCACAAAACAGACAGAAGTACACAGAATGCCCTTCAAGTCA | THE1B  | Cruciform (6-bp, 3-bp)                                              |
| 44 | GATAGAATAAGCCAAATCTGGTTTTCATCATTCAAACTATGTCAATTTGGTTAAGTTAATTAAGTATTTCTATGCCCTCAATTTTCTTATTTGTCAAATGAGCATAATAATAGTTATTTACGCCGGCGCAGTGCCTCATGCTGTAAATCCAGCACTTTGGGAGCCGAGGAGGGCAGATCATTGAAAGTCAGGAGTTC AAGACCAGCCTGGCCAACGTAGTGAACCCCTGTATCTACTAAAATAACAAAATTAGCTGGACGTGGTGTAGTGGGGCTGTAAATCCAGCTACTTGGCAGCTGAGGAGGAGAAATGCTTGAACCTGGGAGATGGAGGTTGCAGGGATCCAAGATTGCGCCACTGCACTCCAGCTGGGCAACAGAGTGAGACGCCATTTCAAAAAAGAAAATAAATAGTTACTTTCATGGAGTTGTGTGAGGATAAATTAATAAATCTAGGTACTACAGTGGGTAATAAATGGCACATTTGTATACTCGCTAAAAAGTTATAAATTAATCTATACAAAAGTTGTTCTGTGAAAAGTGTACGTTTCAATACTGAAAATTTGTTAATTTATGAGGGATTAAA                                                                                                                                                                                                                                                                                                             | -      | -                                                                   |
| 45 | ATTCATTTACTGAAAAGCAGCAAAGAAGTGTAGATTAATAAAGCTATGGTCAGCTGGGCATGGAGGCTCATGCCATAATCCCAGCACTTTGGGAGGCCGAGTGGTGGATCATGAGGTCAGGAGTTCAAGATCAGCCTGACCAACATGGTGAAAATCCATCTCTACTAAAACACAAAAAATAGCTGAGTTTGGTG GTGCATGCCGTAAATCCAGCTACTTAGGATGCTGAGGCAGGAGAAATCGGTTGAACCCGGGAGGCGAAGGTTCCAGTGAACCTGAGATCGCGCCATTGCAT                                                                                                                                                                                                                                                                                                                                                                                                                                                                                                                                                                                                               | L1MA9  | Cruciform (7-bp, 0-bp)                                              |
| 46 | TCCAGCTGGGCAACAGAGTGAGACTCCCTCTCAAAAAAAGAAAAAGCAAGCCATGGTCAGGTGCAGTGGCTCACACCTATGATCTTGCCTTTGAGAGGCTGAGGCAGGAGATCACTTGAGCCCAAGAGTTTGAACCAAGATTTGAGCCCAAGATCCCTGCTTTTACAATAAATCAAAAAATTAGCCG GGCATGGTGGCACAATGCCTGTAGTCCCAGCTACTTAGGAGGCTGAGGTGGGAGGATCACCTGAGCCCAGGGGTCGAGACTGCAGTAAGCTGTGACTGCA                                                                                                                                                                                                                                                                                                                                                                                                                                                                                                                                                                                                                       | L1MA9  | Cruciform (6-bp, 4-bp);<br>Cruciform (6-bp, 0-bp)                   |
| 47 | CCCAAATTCCTTTCATTAATTTCCCAACCCCACTACCAGTTCTCCAGAGATGATTAGGTTCTGGAAACAGGTTGCCACAAAAATTAATTTGTTTAA GCTATTTATTAATGTAAGATAGTGGTTGAATATCTGGCCCAAGACAGTTAATGGTGTCTGGGAGGCTGGCTCATTTCAAACCAAATCATGGGTCAGGTG GCAGTTGGTGAATGTAGGGACCAACACAGCAGTGTCCCGTAGCAAGGAGCAAGCTCTGGGACACAGCCTGGTCCCACTTGTGTGGCCCTTGGAC                                                                                                                                                                                                                                                                                                                                                                                                                                                                                                                                                                                                                    | AluSz  | -                                                                   |
| 48 | ACATTGCTTAACTTCTCGGGCCTTTAGTTTTCTCACTCATAAAAAGGGCATGATCATACTGTCAACAGGATTGCTGGGAAAAGCAAAATGGGTCATATAT GTAAAGGGCCCCAACATTTGTGGAAGTACCGAATGTGTGCCACAAAGTACAGGAGATCCAGTTGGGATTTCCAGCTTAGCTGGAACTTCAGGCAAGTCA TTTCTTTGTGATGATGACTGGATCATATGCTGAAAGTGTTTAATGATGACAAAAATTTGCATCTTGTTTACTCAGCACTCTTACATACTGGGCCCTC                                                                                                                                                                                                                                                                                                                                                                                                                                                                                                                                                                                                             | MIRc   | -                                                                   |
| 49 | ACTGATACTCTGAGGCTCAGAGAGGTAAGTGAATTTTACCAGGGTCAACAGCAAAATGAGTGGCAAAGCAGGAGATAAGACACTAGTTTGAACCTGTA AATCACCAGCCCTTTCTCTATGCCTGTTTGCCTTGGAGCTTTGGGCTGATAGGCTGGTGGGCAGGCTCACCCCAATCATGAGCTTAGGCCCTGGCATT GCTTACCAGCTCCTTCCCCTGGTGAGGGGACCCAGGGAATATCTGCTGCTGTCCCAGGACTGACGTGATGGGCTAGGTTGTGAGCCCTGGTCCGGT                                                                                                                                                                                                                                                                                                                                                                                                                                                                                                                                                                                                                 | AluSx3 | -                                                                   |
| 50 | CTGCAAGTGTGATAGGATGATACATTAAGAACCAAGCAGCAAGCAGCACTGGCTTCTCTCAAATCCCTCCATAGATGTCAGTTAGCTTGAGTACTGCCAGA TTAGAAGCTCTCGTGGCAGGATTTGTGTGTTTTGTGCCTATAAACTCTGTAACACTAAGTGAAGAAAACACAGTACCCCTGGGGAAGAGCAGGAG TTAGGACTGTGGCAAAGAAATGCATGAAAGAGACAGAAAGAAAGGTCAGGGAAGTAGGAAACCAAGGCGGTTATTTAGCCTAGAAAATAAGGGAG                                                                                                                                                                                                                                                                                                                                                                                                                                                                                                                                                                                                                  | AluJb  | Cruciform (6-bp, 3-bp);<br>Polyurine tract (18-bp)                  |
| 51 | GAGAGAATGTTGAGGAAGAAAAGGTGATGGTGTCAAATGCTGCCAAGAGGCTACAGAGGGTAAAGAAATGAAGCTTTTCTTTGGATTTTGCACCTAAG AGCATGAGAGGCCCTTTGTAAGGTGTGAGTGGGTGATCAGATGGCAGAGGACTTCAATGGCCAAAGGAGAAAGAGACAGAGAATTAGGGGGCTCTCCAG CACAACCAAGAAATACTAGCACTTATGGAGCACTTGACATGTGCCACCCACTGTGAAGCATATTTGTACAATATTTCAAGTAATTTCTGTCAACATCTCTG                                                                                                                                                                                                                                                                                                                                                                                                                                                                                                                                                                                                           | -      | -                                                                   |
| 52 | CAAGTGTGCTATTGTCCCATCTCAATGATAAGATCAGATGGCTTAAATTAATTTCCCAAGTCAACAGCTCAACAGCTAAGAAGGAGATCCAGGAGTTAA GCATGGTCTCTTTGATTTCTTAACTTGAGTCTTAACTAATGTAGGAAAGAGGAAAGAAATAGCAGAAAAGGGCCCAAGGTGGCAAGGACCCAGGATCT GGGACTCAGGAGTTGAGGATGCCCTTCTTCTGGGTGCTGTCTATCTGAGCCACTTAGTCTAAACCAAGAGTTACTTTGATACCATACATAGTTTAC                                                                                                                                                                                                                                                                                                                                                                                                                                                                                                                                                                                                                | -      | Cruciform (8-bp, 1-bp)                                              |
| 53 | AGGCTGAAGAACTTCTGCAACCCCTGATTCCATAATAAGCCCTTTGGCACTGTGTGAGCCAATGAGGAAGCTTCTGGAAGAGAGTTGAGCCCCGAATCC TTTGAAGATTAACAAGGCAGGATATGGCTGCACACTGTAAATCTCAACTTTGGGAGGCGAGGTTGGGAGGATTGTTTGAAGCCAGAGTTTGA                                                                                                                                                                                                                                                                                                                                                                                                                                                                                                                                                                                                                                                                                                                       | -      | Cruciform (8-bp, 1-bp);<br>Cruciform (6-bp, 4-bp)                   |
| 54 | AGGCTGAAGAACTTCTGCAACCCCTGATTCCATAATAAGCCCTTTGGCACTGTGTGAGCCAATGAGGAAGCTTCTGGAAGAGAGTTGAGCCCCGAATCC TTTGAAGATTAACAAGGCAGGATATGGCTGCACACTGTAAATCTCAACTTTGGGAGGCGAGGTTGGGAGGATTGTTTGAAGCCAGAGTTTGA                                                                                                                                                                                                                                                                                                                                                                                                                                                                                                                                                                                                                                                                                                                       | -      | IR (10-bp, 34-bp)                                                   |
| 55 | AGGCTGAAGAACTTCTGCAACCCCTGATTCCATAATAAGCCCTTTGGCACTGTGTGAGCCAATGAGGAAGCTTCTGGAAGAGAGTTGAGCCCCGAATCC TTTGAAGATTAACAAGGCAGGATATGGCTGCACACTGTAAATCTCAACTTTGGGAGGCGAGGTTGGGAGGATTGTTTGAAGCCAGAGTTTGA                                                                                                                                                                                                                                                                                                                                                                                                                                                                                                                                                                                                                                                                                                                       | -      | -                                                                   |
| 56 | AGGCTGAAGAACTTCTGCAACCCCTGATTCCATAATAAGCCCTTTGGCACTGTGTGAGCCAATGAGGAAGCTTCTGGAAGAGAGTTGAGCCCCGAATCC TTTGAAGATTAACAAGGCAGGATATGGCTGCACACTGTAAATCTCAACTTTGGGAGGCGAGGTTGGGAGGATTGTTTGAAGCCAGAGTTTGA                                                                                                                                                                                                                                                                                                                                                                                                                                                                                                                                                                                                                                                                                                                       | -      | MR (10-bp, 62-bp)                                                   |
| 57 | AGGCTGAAGAACTTCTGCAACCCCTGATTCCATAATAAGCCCTTTGGCACTGTGTGAGCCAATGAGGAAGCTTCTGGAAGAGAGTTGAGCCCCGAATCC TTTGAAGATTAACAAGGCAGGATATGGCTGCACACTGTAAATCTCAACTTTGGGAGGCGAGGTTGGGAGGATTGTTTGAAGCCAGAGTTTGA                                                                                                                                                                                                                                                                                                                                                                                                                                                                                                                                                                                                                                                                                                                       | AluJb  | IR (10-bp, 66-bp)                                                   |









|     |                                                                                                                                                                                                                                                                                                                           |        |                                                                                                                                                                                                                                              |
|-----|---------------------------------------------------------------------------------------------------------------------------------------------------------------------------------------------------------------------------------------------------------------------------------------------------------------------------|--------|----------------------------------------------------------------------------------------------------------------------------------------------------------------------------------------------------------------------------------------------|
| 116 | AACCCGGGAAGCGAGGTTGCAGTGCAGTAAAGATAGTGCATCGCACTCCAGCCTGGGCAATAGAGCAAGACTCCACCTCAAAAAAAAAAATAATAATAAAA<br>TAATAAAAAACA AACTT ACAGAGTTT CCACTACAGCTGAATATAACCC CAAGCAACTGTT TTAATAATTTTAA CATGATTAAGAGCTCACAAAATGCCA<br>AAAATTCATCAAGTTTGTATTTCAATACTAAGCCACCCAAAAGCTTAGGGAGTATTTCCCTTCAACCCCTCCAAAACAACAGTGACTGATATATTTTCT | -      | DR (10-bp, 1-bp) (underlined);<br>Triplex motif (13-bp, 1-bp) (grey);<br>STR (13-bp) (bold);<br>Cruciform (6-bp, 3-bp);<br>Cruciform (6-bp, 0-bp)                                                                                            |
| 117 | CCAGAGTTTAGTTACTAAAAGACATATGTAGAGGCCAGGTGCGGTGGCTCATGCCTATAATCCCGCACTTTTGAAGGACGGATCACTTGTGTCCAGGA<br>GTTCAAGACCAGCTGGGCAACATGGCAAACTCTGTCTCTAGTAAAAATATACAAAAATCAGCTGTGTGTGGTGGCATGGCTTGTAGTCCCAGCTGCTT<br>GGGAGGCTAAAGTGACAGGAACACTTAGCCTGAGAGTTGAGGCTTCACTGGGTGTTTTCACCCTGCCTCCAGCCTGGGTGACAAAGTGAGACC                 | AluJb  | Triplex motif (6-bp, 1-bp)                                                                                                                                                                                                                   |
| 118 | CTGCCTCAAAAATAACCAAAACAAACAAAAGAAAACACATATATAAAACACAAAATATTTGCTAACAAAGACATACTGATTA AAAACTGGCCAGGTA<br>CAGTGGCTTACGCCTGT AATCCTAGGATTTGGGAGGCTGAGGCAGGTGGATTG CCTGAGCTCAGGAGTTTGGAGCCAGCTGGGCAACATGGTGAACC<br>CTGTCGCTGCTAAAAACACAAAATTAGCTGGTGGTGGTGCCTGCCGTAAATCCAGCTACTCGGAGGCTGAGGCAGGAGAATCATTGAGCTCAGG               | AluSx  | STR (12-bp);<br>Cruciform (6-bp, 0-bp);<br>Cruciform (6-bp, 0-bp)                                                                                                                                                                            |
| 119 | AGGTGGAGGTTGCAGTGCAGCCGAGATCACGCCACTGTACTCCAGCCAGGTGAGAGGCAATACTCTGTCTCGAACAAACAAACAAACAAAACACCAC<br>AAAAAAAAACAGAAAAACATATTTATCAAAAAATAAAGACAGCCGGGTACAGCGGCTCATGCCTGTAATCCAGCACTTTGGGAGGCTGAGGCAGTTGAA<br>TCACGGAGTCAGGAGTTCAAGACCAGCCTGGCCAACATGGTGAACCCCGTCTCTACTAAAAATACAAAAAATTAGCTGGTCACTGGTGGCGGGCACCTG           | AluSg7 | STR (18-bp)                                                                                                                                                                                                                                  |
| 120 | TAATCCCAGCTACTCAGGAGGCTGAGGCAGGAAAATTGCTTGAACCTGGGAGGTGAGGTTGCAGTGAGCCGAGGCCGTGCCACTGCCTCCAGCCAGG<br>GGACAGCACGAGACTCTGTCTCAAAAAAAAAAAAAAAAAAAAAAAAAAGGCCAGGTGCGGTGGCTCACGCCTGTAACCCCTGCACTTTGGGAGGCCGAGGC<br>GGGCGGTCAAGGTCAGGAGATCGAGACCATCCTGGCTAACATGGTGAACCCCGTCTCTACTAAAAATACAAAAAATAGTTGGGCTTGGTGGCGGG             | AluY   | Polypurine tract (25-bp)/<br>Triplex motif (12-bp, 0-bp)/Slipped<br>motif (12-bp, 0-bp)                                                                                                                                                      |
| 121 | CCTTGTAGTCCCAGCTACTCGGGAGGCTGAGGCAGGAGAATGGCGTGAGCGGGGAGGCGGAGCTTGCAGCAAGCTGAGATTGCGCCAGTGCCTCCAG<br>CCTGGGCGACAGAGCGAGACTCCGTCTAAAAAATAAAAAATAAAAAATAAAAAATAAAAAATAAAAAATAAAAAATAAAAAATAAAAAATAAAAAATA<br>TCAACATATTTTTTCTCAGTTTCTGTGAATGTATACATAGCTATTTGTCTTTGTACTGACACCAAGACATCAGTCATTAGTAATAATGGAAACAG                | AluY   | Cruciform (7-bp, 1-bp) (green);<br>Polypurine tract (10-bp);<br>Slipped motif (12-bp, 0-bp)/<br>STR (27-bp) (pink);<br>Triplex motif (11-bp, 1-bp)<br>(underlined);<br>Triplex motif (12-bp, 1-bp) (bold);<br>Cruciform (6-bp, 3-bp) (green) |
| 122 | CAACAATA CAGCAGCAGCTATTATCTACTGAGTACCTGTATGCCAGGTAATCTGTACCTATGGTCTCATTTAAACTCTACCATAACCTGTGAAGAGAA<br>CCTGTGTAGATGAGTAACATGGGAGTCAGAGAGATGAAACTGGCCATATCACAAAGTTAGTGAAGTGGCAGAGATTTGAAATTCAGTCTGACTCAAGAAT<br>GACTTGTAAAGCACTGCTATGTTTCTCCTTGTCTTCTTACACTTAAGCTTTTTTAGAA AAAAAAGTGCTTAATTGAGAATTTCAAACAGAAAACGTA         | MIRb   | STR (10-bp);<br>Cruciform (8-bp, 4-bp)                                                                                                                                                                                                       |
| 123 | TATATATGATTTGGTAATCTGTTACAGTAGTGGCCCCCAATGAACCAGGAATTCACATTTCCAACACTCTGTTGGCCTTGTGTGGTCTCTCCCTAGAA<br>TCTGGGCTGGCCTGTGACTAGCAATGCAGT CACACGTGCACAGCAATAAGTGAACACTGATCCTGTGCCAGTTCAGGCCCTCATCCTTCAGAAGACCTG<br>TCAACATCTGCTTTTGGAGGCCACCATGAAAGAAGTATGCTATCTTCTGGAGAGGACAAGGGGAAAGAGACAGGAAGGTGAAAAGGCAGGAAGGGAG           | MLT1H2 | Z-DNA (12-bp)                                                                                                                                                                                                                                |
| 124 | GAAGACAGGGAGAGAGACTGGCACC AAAAGCCAGGTATGCCAGTGTCCAACCTGAGACTAGCTAATACTAAGTCTCCAAATAAAAATGAATGTTCTCTGT<br>CAGACATTCAGCCACAACCTGCAACCACAAGAGTGTGGCAAGCAAAAC CAGGAGAACTACCTATCTGAGCCCACTCACTCCAGAAATGTAAGCAAA<br>TAAAATGGTTGCTTTTTAAGTCATTAAGCTTTGGCACAGTTTTATTACGTAGCAGTAAACAAATCATATAAAAAAATACACGCTTAATTTCTTGATTATCT       | MLT1H2 | -                                                                                                                                                                                                                                            |
| 125 | ATACTAATAGAGTGCACATCATCAAGACCAAGACAATCGAAAAAGAATGTCTGCCAAATTACACCCACAACATTCATAAAGGCATTCATTCAACATTTA<br>TTGAGGCCATGATGTGTGAGAATTAGGGTTATAAAGATGAATAAAGCATGGTCTTCACTCAAAAATCTCATTCTGGTAAGGGGGATGGCAAGCAAA<br>AGTAACTATAATGAAATGAATTAATGTTCTTACATATCTGGGCGACCCAAAACCTGCCATCAGAGCATAAAAGAGCATTATGATGGGAAAGAGAGTAGGAG          | L2c    | -                                                                                                                                                                                                                                            |
| 126 | ACATTTAAAGAATAAGTTGTGTCAGTTGGAGGAGCAGGGGATGTACCTTGAATAACAATAATATTTAGTATTATATGGCTGACATTAATTAAGAATCTCC<br>TATGTCTTAGGCAGCTGTGCTAAGCTTTTTTTTTTAATAACTATAAGTTTGGGTTACATGTGCACAACCTGCAGGTTTGTACATATGTATACATCTGC<br>CATGTTGGTATGCTGCCCTATTAACTCGTCATTTAAACATTAGGTATATCTATCTCCTAATGTAT CCCCCCTCCCCACACCAGTGCTAAGCATT             | L1PA4  | Polypyrimidine tract (10-bp);<br>QC (21-bp)                                                                                                                                                                                                  |
| 127 | TTAAATAAGTTTCTCATTTTAATTTCCACAATGGCCAGGTAAGCAGATACTACCCTTATCCTCATTTTACACAGAAGGAAACTGAAGATTAGGAAAAT<br>TAGTTTCTCAAGCTTTCAGACTAATACGAACAATAAATAGCTGCAAAATATTAGTGACTCACTGATAGCCCTCAATAAATAAAAAAGGCTGGTTGGG<br>TGTGGTGGCTCTCACTTGTAAATCCAGCACTTTGGGAGGCTAAGCGGGCAGATCACTTGGCCAGGAGTTCAAAACCAGCCTGGCCAACACAGTGAAA              | -      | -                                                                                                                                                                                                                                            |

|     |                                                                                                                                                                                                                                                                                                                                                                    |         |                                                                                                                                                                             |
|-----|--------------------------------------------------------------------------------------------------------------------------------------------------------------------------------------------------------------------------------------------------------------------------------------------------------------------------------------------------------------------|---------|-----------------------------------------------------------------------------------------------------------------------------------------------------------------------------|
| 128 | CCTCGTCTCTATTAATAAATACTAAATAGCTGGCCTTGGTGGCGCATGCCTGTAATCCAGATACTCGGGAGGATGAGACAGAAGAATTGCTTGAATCC<br>AGGAGGCAGAGGTTGCAGTGAGCCGAGACTGAGACACTGCACCTCCAGCCTGGGTGACAGAGCAAGACTCCGCTCTCGAAAAATAAATAAATAA<br>CAATAAAAGGCTCTCTATATTTTGGCTTTTAGATGACAAAATAGTTCATATCTTTACCAGATTTATAGCAATAAGAATAGTTATCGGCCAGGAGC                                                            | AluSz   | STR (13-bp)                                                                                                                                                                 |
| 129 | AGTGTCTCTACTAAAAATACAAAAAATAGCCGAGC <b>GTGGTGGTGG</b> GAGCCTGTAATCCAGCTACTCAGGAGGCTGAGGCAGGAGAATCGCTTGAACCC<br>GGGAGGCAGAGGTTACCGTGAGCTGAGATCGTGCCACTGCACCTCCAGCCTGGGTGACAGAGCAAGACTCCACCTCAAAAAAATAAATAAATAGTTCTCTAT                                                                                                                                              | AluSx1  | STR (10-bp);<br>Polypurine tract (14-bp)                                                                                                                                    |
| 130 | CAAAATATATACATTACAATCTACACTAAAACAAAATTTGCCGGCATGGTGGCTCATGCCTGTAATCCAGCACTTTGGGAGCTCGAGG <b>CAGGTC</b> GAT<br><b>ACCTG</b> AGGTCGGGAGTTTGGAGCCAGCCTGACCAACATGGTGAAACCC <b>AT</b> CTCTACTAAAAATACAAAATAGCCGGGTGTGGTGGCACATGCTTTGTAA<br>TGCCAGCTACTCGGAAGGCTGAAGGAGGAGAATCACTTGAACCCCGGGAGGCGGAAGTTGCCGTGAGCCAATATTGCCCATTTGCACTCCAGCCTGGGC                          | AluSp   | Cruciform (6-bp, 3-bp)                                                                                                                                                      |
| 131 | AACAAGTGCAGAACTCCGCTTTAAAAACAATAAATCTACACACAAAAACATACCTCTATAACATTCACACACAT <b>TTTTTCTTTCTTTTCTTTCT</b><br><b>TTCTTTTTTTTTTTTTTTTT</b> GAGATGAAGTCTTGCACTATTGCCAA <b>GC</b> TGGAAATGCAGTGGCGCAATCTTGGCTCTGTGCAACCTCTGCCTCCAGG<br>TTCAAGCAATTCTCTGCCTCAGCCTCCCGGGTAGCTGGGATTACAAGCACCCACCACCAAGCCTGGCTAATTTTGAATTTTAGTAGAGATGGGGTTT                                  | AluSx1  | Slipped motif (11-bp, 0-bp) (pink);<br>DR (14-bp, 1-bp) (bold);<br>Triplex motif (15-bp, 4-bp) (blue<br>letters); STR (15-bp) (underlined);<br>Polypyrimidine tract (19-bp) |
| 132 | CAGCAT <b>TTGGCCAGC</b> CTGGTCTCGAACTCCTGACCTCAGGTGATCCACCCGCCTTGGCTCCCAAAGTGTGGGATTACAGGTGTGAGCCATTC <b>GCCT</b><br><b>GGCCAACT</b> TTTTTGTATTTTAGTAGAGATGGGGTTTACCAT <b>TTGGCCAGG</b> CTGGTCTGAAACCTGACCTCAGGTAATCCACCAACTTGCATCCC<br>AAAGTGCTGGTATACAGGAGTAAACCACCTGCCGACCAGAAAATGGCTAGTTTCTTC <b>TTTTTTTTTTTTTTTTTT</b> GAGATGCAGTCCCACTCTGT                   | AluSq10 | IR (11-bp, 79-bp);<br>IR (11-bp, 35-bp);<br>Polypyrimidine tract (20-bp)/<br>Slipped motif (10-bp, 0-bp)/<br>Triplex motif (10-bp, 0-bp)                                    |
| 133 | TGCCAGGCTGAAGTGCAGTGGCGCAATCTCGGCTCACTGCAACCTCTAACCCCGAGTTCAAGTAATTTCTTTGCCTCAGCCTCCTGAGCAGCTGGCAT<br>TACAGGCGCACCACCACCCACCTAACTTTTTTGTATTTTAGTAGAG <b>AG</b> GGGGTTTACCATGTTGGCCAGGCTGGTCTCGAACTCCTGACCTCAGGT<br>GATCCGCCCGCCTTGGCCTCCC <b>TAAAT</b> CCTGGGATTACAGGTGTGAGCCACTGAGCCCGGCCAGAATGGCTTGTTTAATTCCTTTGACCTCCTTCTAT                                     | AluSx   | -                                                                                                                                                                           |
| 134 | ATTTCTGGG <b>AGTTT</b> <b>TAAACT</b> CAACCAGCAGCTTTCAGAGTACCATATTTAAAGATGATTTCTGTACATTTGGTGTGGTTCAGGAAATAAAAAGTT <b>AAAA</b><br><b>AAAAAAAA</b> GACAATTTGTAGGCCGGGCATGGTGGCTCACACCTGTAAT <b>CC</b> CAACACTCTGGGAGGCCAAGGCGGGCAGATCAGGAGTTCAGGAGTT <b>CGA</b><br>GACCAGCCTGGCAAATATGGTGAACCTCCGCTGTACTAAAAATAGAAAAACTAGCCGGGCATGGTGGCATGCACCTGTAGTCCAGCTACTCGGGAGGC | AluSg   | Cruciform (6-bp, 1-bp);<br>Polypurine tract (14-bp)                                                                                                                         |
| 135 | TGAGGTGGGAGAACTACTCGAACCCGAAAGCAGAGGTTGCAGTGGCCGAGATCGCACCCACTGCACCTTAGCGTGGGTGACAGAGCAAGACTCCATCTC<br><b>AAAAAAAAAAAAAAAA</b> GACAACCTGTAAAAAGATTTATTTGGTAAAAG <b>CT</b> GACTCAAAAACCAATGTAATAATGTGGTCTTTTGAACAATAACAGTC<br>AAGCATCACATAATGATGTTTGGACAATGACAATCACATACATAAATGGTAGTCCCATAACTATATATFACTATATTTTATGTCTTACTGTATCTCT                                     | -       | Polypurine tract (16-bp)                                                                                                                                                    |
| 136 | TTCTTCT <b>TTTTTTTTTTTTTTTTTTTT</b> AGACAGGGTCTAGTTCTGTTGTCGAGGCTGGAGTACAGTGGTGTGATCATGGCTTACTGCACCCTCAGCCTCC<br>TGGGCTCAATAAACTCTCACCTTTGCCTCCCGAGTAGCTGGGACCAC <b>AG</b> GCATGCACCACCACACTGGCTAATTTTAAATTTCTTTGTGGAGATGGG<br>GGTCTCCCTATATTGCCAGACTGGTCTCAAACCTCTGGGCTCGAGATCTTCCCGCTTGGCCTCTCAAAGTCTGGGACTACAAGTGTGAGCCAGCATG                                   | AluJr   | Slipped motif (10-bp, 0-bp)/<br>Triplex motif (10-bp, 0-bp)/<br>Polypyrimidine tract (20-bp)                                                                                |
| 137 | CCTACTGCACCTTTCTATGTTAGATGCACACTTACAGTTATGTTACAATACTATCTACAGTATTCAGTATAGTAAATGCTGTACAGACTTGTACCCTAGG<br>AGCAATAGAATATACCATATAGCCTAGGTGTGTAGCAGATGATACCAT <b>TA</b> GGTTTGTACAATGACAAAATCGCCCAATGACACATTTCTGAGAATATAT<br>CCCTGTTGTTTTGACTGTATATGTTGGCTTTTATTTTTACCCCTTATTTGCAATTAGTTTTGCTTCCAGTATTTTGGGGTACCAGAATCAATACATT                                          | -       | -                                                                                                                                                                           |
| 138 | GCAACCTACCACCAAAATGTTCTTTAAATATCTACAATAGACTCCACCTCTGTATAAAAATGAGGCTGTGGGACAGGCACAGTGGCTCAGCCTTGT<br>AATCCTAGACTTTTGGAGCCGAGGTGGTGGACAG <b>CTGAGCTCAGG</b> AGTTCAAGCCAGCATGGGCAATATGGTGAACCTCCTTCTACTAAAAATA<br>CAAAAAATGAGCCGGGTGTGGTGGCATGCGCCTATAATCCAGCTACTCAGGAGGCTGAGGCAGGAGAATTGCTTGAACCCGGGAGGTGGAGGTTGCAGT                                                 | AluSx   | Cruciform (6-bp, 0-bp)                                                                                                                                                      |
| 139 | GAACCAAGTGGTGGCTGCACCTCCAGTCTGGGTGACAAAGTGAACCGCTCTC <b>AAAAAAAA</b> GCCTTGCATGGGAAAAATATTTCTTGTAATGCCTTA<br>TGATGTTACCAAAATCTTATAATGCTAACAAAATGCTTATAATGTTAA <b>TAAAAAT</b> AAAAATTTGATACAAAGTTCATATACAGTAGTCTCTCAACTTT<br>GCAGAATAATATGTATAGAAAGATACATCAAAATGTTAACTGCAGCCAGGCAGGCTGGCTCAAGCCTGTAATCCAGCACTTTGGGAGGCCGAGGAAG                                      | -       | Polypurine tract (10-bp)                                                                                                                                                    |
| 140 | TGGATCATGAGGTCACAGATGGAGACCATCTGGCCACGTGGTGAACCCCATCTCTACTAAAAATACAAAAATAGCTGGGTGTGGTGGCAGGCCTC<br>TGTAGTCCAGCTACTCAGGAGGCTGAGGCAGGAGAATGGCTTGAAC <b>CG</b> GAGGCAGAGGTTGCAATGAGCCGAGATGGGCCACTGCACCTCCAGCATG<br>GCGACAGAGTGAGACTCCATCC <b>AAAAAAAAAAAAAAAAAAAAA</b> AGTTAACTGCAGTTGCTGTAAGTAGTAGGTTATTTTAAACTATTTTCACTCTGGG                                       | AluSc   | Polypurine tract (23-bp)/<br>Triplex motif (11-bp, 0-bp)/<br>Slipped motif (11-bp, 0-bp)                                                                                    |
| 141 | CTGAGTGTGGTGGCTCATGCCTGTAATCCAGCACTTTGGGAGGCCGAGATGCGCGGATCACCTGAGGTCAGGAGTTTGGAGCCAGCC <b>TCACCATGGT</b><br><b>AA</b> ACCCCGTCTCTACTAAAAATACAAAAATAGCTGGGCGTGGTGGCGGC <b>CA</b> CTCTGTAATCCAAAGTACTCAGGAGGCTGAGGCAAGAGAATTGCTTGAA<br>CCTGGGAGGTGGAGGTTGCAGTGAGCCAAGATTGAGCCATTGCACCTCCAGCCTGGGCACAAGAGCGAAACTTCATT <b>AAAAAAAAAAAA</b> TTATTTCACT                 | AluSq2  | Cruciform (7-bp, 0-bp);<br>Polypurine tract (12-bp)                                                                                                                         |

|     |                                                                                                                                                                                                                                                                                                                                                                                                                                                                                                                                                                                                                                                                                                                                 |        |                                                                                                                                                                                                                                                                                                            |
|-----|---------------------------------------------------------------------------------------------------------------------------------------------------------------------------------------------------------------------------------------------------------------------------------------------------------------------------------------------------------------------------------------------------------------------------------------------------------------------------------------------------------------------------------------------------------------------------------------------------------------------------------------------------------------------------------------------------------------------------------|--------|------------------------------------------------------------------------------------------------------------------------------------------------------------------------------------------------------------------------------------------------------------------------------------------------------------|
| 142 | GTTCTGGTTCCTGTATCTGGATTTAACCTTTCTTAGAATACTATAAATAGGGACACTTTAAA <b>TACTACTACT</b> GTAACAAATTATACACAGATTTTGTAGTGTTTTCAAATGGGTAACAGAGGGAAAGTGGGAGATAAAAAGGA <b>GCAATAATGGCTTTCTTTCTTTTCC</b> <b>TTTTTTTTTTTTTTTT</b> GAGACAGTTTCTACTCCTGTTGCCAGGTGGAGTGCAGTGGCATGATCTCGGTCCACCGCAACCTCGTCTCCTGGGTTCAAGCAATCTCTTGCCCTCAGCTCCCGAG                                                                                                                                                                                                                                                                                                                                                                                                    | -      | STR (10bp);<br>Polypyrimidine tract (16-bp)                                                                                                                                                                                                                                                                |
| 143 | TAGTAAAGATTACAGGCG <b>CCACCACCA</b> ACCCGGCTAATTTTTGTAATTTTTAGTAAAGATAGGTTTCATCGTATGGGTCAAGCTTGTCTCAAACCTCTGACCTCAGGTGATCCGCCCGCTCAGCCTCCCAAATGCTGGGATTAC <b>GGTGTGAGCCACCACGCCTGGCCAAACAGCTTTCTTTCTTTGCTAAGCTACTGAGACTTCTGTCTTGGTTTTTTGAAATAACTTTTGTAGT<b>TTTTTTTTTTTTTT</b>GAGACAGTCTTCTTCTGTTGCTGAGGCTGGAGTGCAGTGGTGCAT</b>                                                                                                                                                                                                                                                                                                                                                                                                  | AluSq  | STR (10-bp);<br>Polypyrimidine tract (13-bp)                                                                                                                                                                                                                                                               |
| 144 | CTTGGCTCACTGCAACCTCCATCTCCAGGTATAAGCAATCTCTCGCTCAGCCTCCAGAGTAGCTGGAATTACAGGTGCATTCCACCACACCTGGCTAATTTTTTTTACATTTTTAGTAGAGACAGATTTTGCATGTTGAAGGCT <b>GGTCTCAAACCTCCTGATCTCATGTGATCCACCGCTCGCCTCCCAAAGT</b> GCTGGGATTACAGGCGTGAGCCACTGAGCCAGCCACCAACTAGTATCTTAATTAGGTACCAGGATCTTACCATTGCTCTTGAAGGAGCAGAGACTTGC                                                                                                                                                                                                                                                                                                                                                                                                                    | AluSx  | -                                                                                                                                                                                                                                                                                                          |
| 145 | TTTTGTCACTGCTCCTGAGAAATACTGAATCAGAAATACAAAAGGTACATGAAAGCCAACATAGTCATTTTATAGAGTGAACACACAGACTAAAA <b>TACTGGCATTCTCACTGTAGACACCTCCAGTACCTCAACTAATTTCCCTTT</b> GTATAATGTACCAAGATGAAGTTTTTGGACTTACAAAGATTAAGACCA <b>GGCCTGACTTTGGCATTGTCATCAAGTGGTGGCCACTCTGTGAGCCCTGAGTGGCCAGCTGACATCACTAGTGCATTTTGATCAGTTATCTCTACTT</b>                                                                                                                                                                                                                                                                                                                                                                                                            | -      | -                                                                                                                                                                                                                                                                                                          |
| 146 | ACGTTTTGTTTTTGAGATGGAGTCTCGCTCTGTCGCCAGGCTGGAGTGCAGTGGTGTGATCTTGGCTCACTGCAACCTCCGCTGCCCCGGCTCAAGCAATTTCTCTGGCTCAGCCTCCTGAGTAGCTGGACTACAGGTGCACGCTAC <b>CCACACCTGGCTAATTTGTATTTTTTTAGTAGAGACGGGTTTACCATAT</b> TGGCCAGGCTGGATCTCTACTTTATAACAAACAGAAAGGCCAATGCTGTAGAAATAGGACAAGTATGAAAGATATAATAGAAGTGAATATAAAAAATGAA                                                                                                                                                                                                                                                                                                                                                                                                               | AluSx4 | -                                                                                                                                                                                                                                                                                                          |
| 147 | TACACAAATAGAATTTATTTTTCTTACTTGTTTTTGTTTTAGGGTAGTAACCTAAGTATCAGCCACCAAAGGAAAGAGGAAAGCATAAAATCCATGAGGCAGTGTATTTCTTGAACACAGAA <b>CTAGGACCTAGA</b> AGTTTCT <b>CAGCCCTACAGTAGGCACC</b> <b>CAATAAATAATTTATTG</b> AGTGAATGAACAAATGAATATTAAGGACAGTGGAGTTAATTTCTTTGGTATTTACATCTTAGTACCAAGGATTCAGTGCATATAGAGAATTTCTTAATGATTCAACATC                                                                                                                                                                                                                                                                                                                                                                                                        | L2a    | Cruciform (6-bp, 1-bp);<br>Cruciform (8-bp, 0-bp)                                                                                                                                                                                                                                                          |
| 148 | AGCTAGGCCAAGTTGGCTGTAACATTATCTGATTTCTGAAGCAATGAACAGCTTTCTAGCTTTAACTTATTCAAACATTAAGAGTTAACAGACAAATCCTTGCATCTACACAGAATCTCTTTCTCTGAAAACAGAGGGTAGA <b>GCCCAAACCTTAACCAAGAGGAGAAACTGCTACATGTTGGCAGTTTTGAC</b> AGAATAACT <b>FAAAAA</b> CA <b>TTTTTA</b> TTCTTCTTCTTCTAAATGTTTACATACAACATGATTTCTCAATACGAGACAAATTTATGCTAGAGTTAAAGGATAA                                                                                                                                                                                                                                                                                                                                                                                                  | -      | Cruciform (6-bp, 2-bp)                                                                                                                                                                                                                                                                                     |
| 149 | GAACTAAAGCAAAGACAAAAGGTAGGCCAGATGCAGTGGCTCACACCTGTAATACCAGTACTTTGGGAGGCCGAGGCAAGAGGATTGCTTGAGCTCAGGAGTTAGAAATCGGCCTGGCAGCT <b>GGCAGGGTGG</b> CTCACCCA <b>GGCAGCG</b> GGTAATCCAGCATTGGGAGGCTGAGGTGGCAGGA <b>TCACCTGAGGTG</b> AGGACTTCGA <b>GGCCAGC</b> <b>CTGGCC</b> AACATGGTGAACCCCTGTCTCTAGTAAAAATACAAAAGTAGATGGGCATGGTGGCAGACGCCTGTAATCTGGCTA                                                                                                                                                                                                                                                                                                                                                                                 | AluSx1 | DR (10-bp, 8-bp);<br>Cruciform (6-bp, 1-bp);<br>Cruciform (6-bp, 1-bp)                                                                                                                                                                                                                                     |
| 150 | TTCCGGAGGCTGAGGCAGGAGAAT <b>CTCTTG</b> AACC <b>CAAGAG</b> CGCG <b>AGGTTGCAGTGCAGC</b> CTA <b>AGGTTGCAGTGCAGC</b> TGAAGGTTGCAATGAGCCAAGATTGTGCCACTTCACTCCAGCCTGGGCAAAAGAGCGAGACTCTCTC <b>AAAAAA</b> <b>AAAAAAAAAAAAA</b> GGAAAGAACTGTCTGGGAAACACAGGAAGACATCATCTCTACTAAAAAAATTAACAAAAATTAGGCAGGTGTGGTGGTGTGACCTATAGCCCCAGCTACTTGGGGATCTGAGACAGGAGGATGGCTTGAGCCTAG                                                                                                                                                                                                                                                                                                                                                                 | AluSx1 | Cruciform (6-bp, 4-bp);<br>DR (14-bp, 3-bp);<br>Polypurine tract (21-bp)/<br>Triplex motif (10-bp, 0-bp)/<br>Slipped motif (10-bp, 0-bp)                                                                                                                                                                   |
| 151 | CAACATTAATTAACCTCAAAAAATATAAATTTGAAGGGGAAAAAATCAGGTCACTGAAGCATATATATAATACAAATATGATTCCATTTGTGTACATTCTAAAGCAGAAAA <b>AATAATAATAA</b> ATTGTTT <b>TAAAAATACAT</b> GTGGTAAAAACT <b>AT</b> TACGGAAGAGTAATCGAAAAATCAACATAAAATTCAGAATAGCGGTTACATGGAGACTGCAACAGAA <b>TACACT</b> TAAATAGCAGCCAAAGGGAGCATCCAGGCATTAATAATGTTCAAACCTGTTCCAGGAAGTGTGGGCACCATATTCTTTAACATA <b>CTTTFGTGTTT</b> <b>GTTT</b> <b>GTTFGTGTTT</b> TAGACAAGGTTTGCATTGTTGCCAGGCTGGAGTGCAGTGGCATGATCAGGACTCACTGCAGCCTCGACCTCCCCGGCTCAAGTGATTCTCCACCTCAGCACCCCCCAAGTAG <b>CT</b> GCAACTACAGGTGCACACCACACCCCGGCTAA <b>TTTTTTTT</b> <b>CTAATTT</b> TAGT <b>AAATTAAT</b> <b>TTAATTTT</b> <b>AAAAAAATTT</b> TTAGATTTTAGTTGCCAGGCTAGTCTCAAATTCCTGAGCTCAAGCAATCTCTGCCTTGCCCTCC | L1ME3D | STR (11-bp);<br>MR (10-bp, 38-bp)                                                                                                                                                                                                                                                                          |
| 152 | CTTTAACATA <b>CTTTFGTGTTT</b> <b>GTTT</b> <b>GTTFGTGTTT</b> TAGACAAGGTTTGCATTGTTGCCAGGCTGGAGTGCAGTGGCATGATCAGGACTCACTGCAGCCTCGACCTCCCCGGCTCAAGTGATTCTCCACCTCAGCACCCCCCAAGTAG <b>CT</b> GCAACTACAGGTGCACACCACACCCCGGCTAA <b>TTTTTTTT</b> <b>CTAATTT</b> TAGT <b>AAATTAAT</b> <b>TTAATTTT</b> <b>AAAAAAATTT</b> TTAGATTTTAGTTGCCAGGCTAGTCTCAAATTCCTGAGCTCAAGCAATCTCTGCCTTGCCCTCC                                                                                                                                                                                                                                                                                                                                                  | AluJb  | DR (11-bp, 4-bp) (pink); Triplex motif (11-bp, 1-bp) (underlined);<br>Triplex motif (12-bp, 0-bp) (bold);<br>STR (26-bp) (green letters);<br>Polypyrimidine tract (10-bp) (blue letters); STR (16-bp) (bold);<br>Cruciform (8-bp, 4-bp);<br>Cruciform (8-bp, 2-bp);<br>Cruciform (6-bp, 2-bp) (underlined) |
| 153 | AAAGTGCTAGGATTACAGGCATGAGTGGTAGCTAACATATGTTTTATGTATTATTTATGTATGACACACAATAAAAGCAAATACACAAGGGTTGAAGCAAGCGTTGGAGACTGAGGGCCAAAAAGTTCCATTTACATAATAAAACT <b>GGTGTGTTT</b> TAAACAGTAACTATGCCAGCTCTAAAGGGTATGGCAGGCCAGACAATTTGAGGAGAAAAAGGATATATTAATCTAATCATATGTTTATTAACCTATTTTCTTAATATACAATTTAAATCAGAGTTTTTATTTGTAGACTT                                                                                                                                                                                                                                                                                                                                                                                                                | -      | -                                                                                                                                                                                                                                                                                                          |



|     |                                                                                                                                                                                                                                                                                                                                                                               |               |                                                                                                                                                                                                                                      |
|-----|-------------------------------------------------------------------------------------------------------------------------------------------------------------------------------------------------------------------------------------------------------------------------------------------------------------------------------------------------------------------------------|---------------|--------------------------------------------------------------------------------------------------------------------------------------------------------------------------------------------------------------------------------------|
| 154 | ATTA AAAAGAGAACATGGCTTAAATATCCAGAAAT <b>TGATGAA</b> <b>TCATCA</b> GATACAGAAAGCACAATTAATCCTTAGAAAGGGAAGTAAAAATGAAATTCCA<br>GGCCGGTCCGAGTGGCTCACGCCTGTAATCCTAGCACCTTTGGGAGGCTGAGCGGGCCGATCACGAGGTCAGGAGATTGAGACCATCCTGGCTAATACGG<br>TGAACCCCGCTCTCTACT <b>AAAAAAAAA</b> TACAAAAAATTAGTCGGGCTTGGTGGCAGTGCCTGTAGTTCAGCTACTCGGAGGCTGAGGCAGAGAAA                                    | <i>AluY</i>   | Cruciform (6-bp, 1-bp);<br>Polypurine tract (10-bp)                                                                                                                                                                                  |
| 155 | GGCGTGAACCCGGGAGTGGAGCTTGCAGTGAAGCCGAGATCGCGCCACTGCACTCCAGCATGGGCGACAGAGCGAGACTCCGTCTC <b>AAAAAAAAAAAAA</b><br><b>AAAA</b> TTGAAATTCACCTAGGATGGCCACAAAATTTATCATTCTAATAGGATATTTTTTAGAGTAAATAGAGCACTATTAATAATTCTGAAAGGGTGGC<br>AGGTGTAAACCAGGACTGTCCAGGAAAAATCAGTAACATATCATCTCTGGAGAAAATAGCAGTACACAGAACGTTCTCTGCGCATTCAGGTAACCGGAG                                              | –             | Polypurine tract (18-bp)                                                                                                                                                                                                             |
| 156 | ATGGACTTCCAGAGGACGCACGCTCAGGGCAGTGGCCTTGAGGACTCCAAGCCGGGATGGTGTCTAGGCCTTTCAAGTCGCCGAGAGCAAAGTGGTATC<br>AGGATAGCACAGACAAAGAAATAAAAGAACTCAAGAGCCCATCAGGTCTCCCGCCCCAGGTGCGACGGCCAGGGCCACATCACCGGTAGTACCGGT<br>CCCCTGTAGCGCCTCCGGGTGCC <b>CTTGGCA</b> <b>GCCAA</b> CGGACCTGAATGGCTCCAGTTCTCTGGAAGTCGGTCAGGACGGAAAGGCATGTCTGTCTC                                                   | –             | Cruciform (6-bp, 1-bp)                                                                                                                                                                                                               |
| 157 | ACGGCGGGGTGTAACGGCTAGGGCCACGT <b>CAGCAGCAGC</b> TTCTCACACACCGCAGGAGTTCTGTCTGAAAAGCACCCCTATTTATACATATGGATCC<br>CAGTGTCTCCAGAACCTGCATGAGGACAGGGGCTTGGTGTCTCACAGGACCCCTCAGGGCCAGCAGGCGGGGCAGGTGCACGGAAACCCCGTAGC<br>GTCAGGGAGCCGCTCATCTTCCAGTGAAGTGTCTCTGCGGGCCGCCCATGTCTGTCCAGTTTGATGATTACAAAGAATACATGTGAACCTT                                                                  | –             | STR (10-bp)                                                                                                                                                                                                                          |
| 158 | CCTTCTGCACATAGCTCCATGCCCTTGTGCAATCAGATCTTCCAGGATCTATTCTGGAACAAGAATGCTAGCTTTAAATTTTTGATAGATCCTGCCAAA<br>AAGGCTTCAAAAAGTTTCTACTTACCCTAACCTTTCGCCATTAACAAAATATTTT <b>AAAACAAAACAAAACAAAACAAA</b> <b>AAAAGAAAGAAAGAA</b> <b>AAAG</b><br><b>AAGAAGA</b> <b>AAAGAAAGAA</b> ACAGCAGTACAGAGAAAATACTGATT <b>GCCAGTACTGGC</b> TGACAGCAGACTTCTCAACGGCAACAATAGATGTCCAGGATAAGA             | –             | STR (24-bp)/Slipped motif (10-bp,<br>0-bp)/Triplex motif (12-bp, 0-bp)<br>(yellow); Triplex motif (12-bp,<br>8-bp) (bold); DR (11-bp, 10-bp)<br>(pink); STR (15-bp) (underlined);<br>STR (11-bp) (yellow);<br>Cruciform (6-bp, 0-bp) |
| 159 | TGAGAAAATATTGGCCAGGTGCGGTGGTTCCTGAGCGTGCATCCTCTGCGCCTGTAA <b>TCCCAA</b> CTACT <b>TGGGA</b> GGCTGAGGACAGGAGAATGGCGTGAAC<br>CCGGGAGGCGGAGCTTGCAGTGAAGCTGAGATCGCGCCACTGCACTCCAGCCTGGACGACAGAGGAGACTCCATCTCA <b>AAAAAATAA</b> <b>TAAATAAAAAT</b><br><b>AAA</b> AAAGATGGGAAAATATCTTCAAGTTACTCAAAGAAAATAATGGTCACTAGAAT <b>TCTATC</b> CCCA <b>GATAGA</b> TGTTATATGAAAGAAAATGACTTTTTC | <i>AluYc</i>  | Cruciform (6-bp, 4-bp);<br>DR (10-bp, 5-bp);<br>Triplex motif (10-bp, 1-bp)<br>(underlined); STR (15-bp) (bold);<br>Cruciform (6-bp, 4-bp)                                                                                           |
| 160 | TCAATGAAGAAAGAGTGTTTTTTACCATTACGTACCAATGTGCAAAGAACTAAAGGATATACTTCAGGGAGAAGAAAATTGAATATAGAAAAAGGAACA<br>AGAAGCAATAAACACAGATGAGTGAACAGACTGGTAGAGTAAAGATAAA <b>AA</b> CTGAATAAGCCATGCCATCATAAAACAATATGAATTTTATAATAAATA<br>ATTTAAGGATATTGAAATAAGATACATTA AAAA AACTGAAAAACAATATGTAAGCTAGGAAGAAAATGATC <b>ATACTT</b> <b>C</b> <b>AAGTAT</b> CAAATAGTTCTTACATT                       | L1ME2         | Cruciform (6-bp, 1-bp)                                                                                                                                                                                                               |
| 161 | ATCTGGGAAAAATATAAAGATGTTGAATAATTGCTACCTGTCAAGTAAAGAATACG <b>TATATATATATAT</b> GTAAAGATTTAAGAATAACACTAAAAGGA<br>TAGAAATAGTATTACAGGTTTCAAATAGTAGAGGTGAAAAAAGAAA <b>CA</b> AAAAACAATAGATCAACCCAATAAGAGCCAAGAAAATGGGGGAAAAAAG<br>AGGAAAAGCTGGCTGGACACAGTGGCTCATGCCGTGTAATCCTAGGACTTTGGGAGGCCAAGGCGGGCGGATCACCTGAGGTGAGGATTCAGAACGAGCC                                             | L1ME2         | STR (13-bp);<br>Cruciform (6-bp, 0-bp) (bold);<br>Cruciform (6-bp, 0-bp) (underlined)                                                                                                                                                |
| 162 | TGGCCAACATGGTGAACCCCATCTCTACTAAAAATACAAAATTAGCCAGGCATGGTGGCATGTGCCTGTGGTCCCAGCTGCTTGGGAGGCTGAGGCAGG<br>AGAATCGCTTGAACCTAGGAAGTGGAGTTGCAATGAGCCAAGATGGCAC <b>CC</b> ACTGCACTCCAGCCTGGGTGACAAGAGCAAAAACCTCACTC <b>AAAAAAA</b><br><b>AAA</b> AGAAAAGCAGAGCACTAGAAAAGAACAAAAGTAAATAAATAGTTCTATATGTATGCATATTAACCAAAATGAGATAATCAATACAACATATCAG                                      | <i>AluSq2</i> | Polypurine tract (12-bp)                                                                                                                                                                                                             |
| 163 | TAATCAGAGT <b>ACATTTTC</b> <b>AAATGT</b> TAAAGGATTTACTCGGGAGATAGAGATTCTCTGATTAGATTA AAA <b>AAATAAAAGTT</b> GCATATATGCTGTTTATAAAA<br>AGACACACAATAAACACAAGGACTCAAAAAAGCTGA <b>AACTTTTATTT</b> AAATGATAAAAAGATAAACTAGGCAAAATTAATCAAAAAGAAAGCTGTTGTAA<br>CAAATCTCTGGC <b>AAAAATATATTTT</b> AAGTCCAAAGCATATTAGAAAATAAAGAGTCATGGCTGGGTGTGGCGACTCACACCCTGTAATCCAGCACTTTGG            | L1ME2         | Cruciform (6-bp, 2-bp);<br>IR (11-bp, 58-bp);<br>Cruciform (6-bp, 0-bp)                                                                                                                                                              |
| 164 | GAGGCAAGGCAGGTGGATCACTTGAGGTCAGGAGTTCAAGACCATCCTGGCCAATATGGTGAACCCCTGTCTCTACTAAAAATACAAAAACATTAGCCG<br>GGTCTAGGTTTCATGCTGTAGTCCAGCTACTCAGGAGGCTGAGGCA <b>GG</b> AGAATCGCTTGAACCTCAGGAGGAGGTTGCAGTGAATCGAGATCACG<br>CCATTGCACTCCAGCCTGGGCTATCTC <b>AAAAAAAAAAAAA</b> <b>TTAAAT</b> <b>AAATTTTAA</b> AAAAAGGAATAAAGAGTCACTATATAATAATTAAGGAGTTAA                                 | <i>AluSz</i>  | Polypurine tract (15-bp);<br>Cruciform (6-bp, 3-bp)                                                                                                                                                                                  |
| 165 | TCAAAAAGGTTGAACATCTCGAACTTTTATGCTTCCAGTTAACACAACCTCAAATATGTTAAGCAAAAATTAATATAAAAAGCAAAAACCTGATAGAA<br>TTACAAGATGAAATTTAAATCTACAAGCATAGTGGGAGAGGTTAACAT <b>CT</b> CTTAGAACTGGAATTTGAAATTAAGAAATAGAAATATCCAAGAG<br>CAAAAAACCAAGTTAGGCTG <b>TAGATTAAC</b> ACAGTAA <b>STTTAATCTA</b> ATGAACATATGGAGAACTCCAACAACAGCTACAGAATATACATTTTAA                                             | L1ME2         | IR (10-bp, 7-bp)                                                                                                                                                                                                                     |



|     |                                                                                                                                                                                                                                                                                                                                                                                                                            |        |                                                                                                                                                                   |
|-----|----------------------------------------------------------------------------------------------------------------------------------------------------------------------------------------------------------------------------------------------------------------------------------------------------------------------------------------------------------------------------------------------------------------------------|--------|-------------------------------------------------------------------------------------------------------------------------------------------------------------------|
| 180 | GTAAATTTTAAAAATTCATTTACTATAGCCAAAAACCTGTAAGATACCTAAAAATGAATTCACAAAAGTTATGCAAAAATTTCCAGAGAAAAAAT<br>GTATAACTTTATTAAAGACTTTTAAAAAACTAAAAAAGAGAGAAATTTATGTTTCATGAATGGGAAGTCCCAGGTTTCATAAAGATGGCAAACTCT<br>CTCCAAACAGTGGATCAATATAATGCAAAATGCAAAACAAATTTCAACTCTGTTGTGTGTGTGCACACAATCTGACAAACTGCTCTTACAATTTATATGGAG                                                                                                              | L1ME2  | Cruciform (7-bp, 1-bp); MR (11-bp, 37-bp) (grey); Polypurine tract (13-bp) (blue letters); Z-DNA (18-bp) (underlined); STR (12-bp) (bold); Cruciform (6-bp, 4-bp) |
| 181 | GAGCTCAGGCCCTAAATAGACAAGTCAATTTTGGAGAACAAAGTGGGATGACTTACCCTATGAGATAGCAGAACATTTATAAAATTATAGTAATTAGCAC<br>AGTGTGCTATTGGCATAGGAATAGAAAAATAACCAATGGCACAGAAGTGAAGCCAGAACAGGCTTAGTCTTTGAGGAAACCTCGTCTATGGCAGAGA<br>TGGTATTACAATTGAGGCTGGGAAGGGGTGATAGTCTAGTCAATAATAATGTTGGAAATATTGGTTCCCTCAAAATGAGGAAATAGAGGGAAAAATAGATTC                                                                                                        | L1ME2  | Cruciform (7-bp, 1-bp); Cruciform (7-bp, 2-bp)                                                                                                                    |
| 182 | TTACATCACACAATAGACAGAAAGCAATTTCAAGTGAATTAAGACCCAAATGTAATAATGCAAAAGTTTAAACTTCTAGAAGAAATCATAGAAAAAATAT<br>CAGAGAAAAGATTTTTTTTTTTTTTTAAACAGAGTCTAAGCTGTGACCCAGGCTGGAGTGCAGTGCATGCAATATCGGCTCACTGCAACTCCGCTCTCG<br>GGCTCAAGCAATTTCTTGGCTCAGCCTCCTAAGTAGGTGGGATTACAGGGCAGCCACCAGCCAGCTAATTTTTGTATTTTTGTAGAGGTGGGAT                                                                                                              | AluSz  | Cruciform (6-bp, 1-bp); Polypyrimidine tract (16-bp); Cruciform (7-bp, 3-bp)                                                                                      |
| 183 | TTACAATGTTGGCCAGGCTGGTCTCGAAGTCTTGCACCTCAATGATTTACCTGCCTTGGCCTCCCAAAATGCTGGAATCACAGGTGTGAGCCACCGCAC<br>CCAGCCAGAAAAAGATTTTTTTTGTTTTTTTTGTGACGAGTCTCGCTCTGTCCAGGCTGGAGTGCAGTGGTGTATCTCGGCTCACTGC<br>AATCTCCGCTCCCGGGTTCACACCATTCTCTCTTCCAGCCTCCCGAGTAGCTGGGACTACAAGAGCTGCCACCATGCTTAGCTGATTTTTTGTATTT                                                                                                                       | AluY   | Cruciform (6-bp, 2-bp); Triplex motif (10-bp, 1-bp)                                                                                                               |
| 184 | TTACTAGAGACAGGATTTACCATGTTAGCCAGGATGGTCTCGATCTCTGACTCGTATCCGCTGCCTCGGCTCCCAAGTGCCTGGGATTACAGGC<br>CCGGCCAGAAAAAGATTTTAAAGTAATCATAAAGCAGAAAGGAAAAAGATTTGTTAAATCTGATGACAAATGCTTAAACAGAGTGAAGAAATGAAGCATG<br>TTGTTCTTATAAAGTAAATATGCACCATCCCTATGATCCAGCAGTTCACCTTTGAGGTATTTACCAAGAGAAATGAAAACACATGTCCACAGAAAGA                                                                                                                | -      | -                                                                                                                                                                 |
| 185 | CAGGTACAAGGATGTTTATAGCCATGTTCTCAGAGTGGCCAAAACCTGAAAACATCTACATGTCCAGCAACAGAAAGATGGATAAAACATATTTGGTAT<br>ATTTATACAATGGAAATCTTCTTAAACAATAAAAAATGAAATCTACATAACAACATAGATGAATCTTAAAAACATTTATGCTGAGCACAAGAAGCCAGACAGA<br>CTTACTGTATTTCTTCTATTACATTAAGTTCTAAATCAGGCAAAATTAACATACATATTAATAGTAAAAGAAAGTCAAACCAAGTAGTTGTGAGGGAAAGGGCA                                                                                                 | L1ME2  | -                                                                                                                                                                 |
| 186 | CGAAAGGCCTTGCTAGGATGGTGGAAATGTTCTATAACATGACAGAGGAGTGGGTTTCATAGCTGCATGTATTTGTCAAAAGCCATCAAACCTAGGCAGGGC<br>GCAGTGGCTCATGACTGTAAATCCAGCACTTTGGGAGGCCGAGGTGGGTGGATCACCTGAGGTCAGGAGTTCGAGACCAGCCTGACCAACATAGTGAAC<br>CCCCATCTCTACTAAAAATACAAAATTAGCTGGGCGTGGTGGCCATGCCTGCAATCCAGCTACTTTGGGAGGCTGAGGCGGAGAATCGCTTGAACCTGG<br>GAGCAGAGGTTGCAATGAGTGAAGATGTCGCTTGCAGCTGCAGCCTGGGCAATAAGATGGAACACTGTGCTCAAAAACAAAACGAAACAAAACACAAA | AluSq2 | -                                                                                                                                                                 |
| 187 | AAACAAAACAAAAGCCATCAAACCTGAGCAATTAAGATTTGTGTAATTAACCTGATTTGAAAAATCAGCCGGGCATGGTGGCTCAGCCTGTAATCCCA<br>GCACCTTTGGGAGGCCGAGGTGGGCAGATCAGAGGTGAGGAGATTGAGACCATCTGGCTAACACAGTGAACCCCGTCTCTACTAAAAATAGAAAAAT                                                                                                                                                                                                                    | L1ME2  | DR (11-bp, 3-bp) (pink); Triplex motif (11-bp, 5-bp) (underlined); STR (19-bp) (bold); A-phased repeat (27-bp) (turquoise)                                        |
| 188 | TAGCCGGTGTGATGGCGGGCACCTGTAGTCCAGTACTCAGGAGGCTGAGGCAGGAGAATGGCGTGAACCCGGGAGGCAGAGCTTGTAGTGAAGCCGAG<br>ATCGCGACTGCCTCCAGCCTGGGCGCAGAGCAAGACTGTCTCAAAAAAAGAAAAAATATCTCTCAAATCCACTTCCCAACCCACTGCAAAA<br>AGACAACTATAGTCTGGGAAAAGGCATTCGCTGATAAGAGATTCTATGTGCAAAATCCAAAGAACTGCCATAAATCAATTTGAGGAAAAAATATC                                                                                                                       | AluY   | -                                                                                                                                                                 |
| 189 | AAATAGAATAGTCACAAGAATAACAACAGGCAATTTACAGAAGAGAAAAACATTTGAAAGATGCTTAACTCACCCTAATCAGGAAAAATAACAACAATAG<br>CACTTCATACCCATTGGATTACAAAAGTTGTTGAAATCTAAGGATACAAAACACTGGTGAAGTGTGGAGAACTGGAATTCAGACAGTGTACTCTGCTT<br>GTGGGAATGTGGACAGGCAGTGCCTAGGAAAAGTGAAGAGGTCCCTCGCTTGTGATCCAGCCATTCCTGGCAGGTGTGTCTTTAGCTGGGGGCATTGTT                                                                                                          | L1ME3E | -                                                                                                                                                                 |
| 190 | ATCTCTCATATGTGCACAAGGGGAACCCCTCACTGCACCCTGTTTGTAAACAAAAAAGAAAAAATGGAGGATGGGCAGAAATACAAAAAAGAAAA<br>CACAGAAGCCACGTGTGGTGGCTCACCCCTGTAAATCCAGCACTCTGGGAGGCCAAGGAGGGCAGATCAAAAGTCAAGGAGTTCAAGACCAGCCTGGCCA<br>ACATGATGAAACCCCGTTTCTACTAAAAATACAAAAATTAGCCAGGCATAGTGGTGCATGCCTGTAATTCCTGCTACTCGGGAGGCTGAGGCAGGAGAAT                                                                                                            | AluSg  | Polypurine tract (18-bp); Cruciform (6-bp, 4-bp)                                                                                                                  |
| 191 | TGCCTAAATCTGGGAGGCGGAGGTTGCAAGTGCAGTGCAGCAAGATCACGCCATTGCCTCTAGCCCTGGGTGACAGGGGAAGACTCCATCTTGGCGGAAAAA<br>AAAAATTAGCCAGGCATGGTGGCAGATCCCTGTAATCTCAGCTACTTGGAGGCTGAGGCAGGAAAAATCGCTTGAATCCCGGAGGCGGAGGTTGCAGTAAAG<br>CGAAGATAATACCCTGCCTCCAGCCTGGGCGCAGAGACTCCGTCTAAAAACACACACACACACACACACATATGGGTCTAGGGGAAAGGCAAA                                                                                                          | AluSx  | Polypurine tract (13-bp); Slipped motif (12-bp, 0-bp)/ Triplex motif (12-bp, 1-bp)/ Z-DNA (25-bp)/STR (25-bp)                                                     |
| 192 | CTAAATGTCTATCATGTCTATCAACAGGGGAATGGATACAGTATGGTATGTCCAGTAAACAGATAAAAAATCATCAGGGAATGAATTACAGGTACACA<br>CAATGTCAACAAAAATGTTTAAAAAACAGGTTACAGTAGACTACAAAATTTGATGTTTCCATTTATATAAAGTTTGAACACAGCAAAAATAAACAAAT<br>CTATTGTTTAGGGATACAAAATATATTGTTATAAGTATAAAGAAAGCATGAAAAACACACACACAAATTTGGGATAATGGTACTGAGGAAAGGGGAGGGG                                                                                                           | L1ME3E | MR (10-bp, 45-bp) (underlined); Cruciform (9-bp, 2-bp); Cruciform (6-bp, 0-bp); Z-DNA (10-bp)/STR (10-bp)                                                         |



**Table S5:** Number of non-B DNA-forming sequence motifs located within the breakpoint-flanking regions of the 15 atypical *NFI* deletions with simple breakpoints as compared with the number of such motifs identified within the control sequence dataset.

| Number of sequences exhibiting                              | <i>NFI</i> deletion breakpoint-flanking sequences (N=30) <sup>a</sup> | Control sequences (N=200) <sup>b</sup> | P-value <sup>c</sup> |
|-------------------------------------------------------------|-----------------------------------------------------------------------|----------------------------------------|----------------------|
| at least one non-B DNA-forming motif                        | 16 (53%)                                                              | 137 (68.5%)                            | 0.14                 |
| specific subtypes of non-B DNA-forming motifs: <sup>d</sup> |                                                                       |                                        |                      |
| inverted repeat                                             | 1 (3%)                                                                | 10 (5%)                                | 0.99                 |
| cruciform                                                   | 10 (33%)                                                              | 84 (42%)                               | 0.43                 |
| short tandem repeat                                         | 8 (27%)                                                               | 43 (21.5%)                             | 0.49                 |
| polypurine tract                                            | 5 (17%)                                                               | 25 (12.5%)                             | 0.56                 |
| polypyrimidine tract                                        | 2 (7%)                                                                | 22 (11%)                               | 0.75                 |
| Z-DNA                                                       | 2 (7%)                                                                | 7 (3.5%)                               | 0.33                 |

**a:** Thirty *NFI* deletion breakpoint-flanking sequence fragments were analysed, each encompassing 300-bp. In parentheses are the proportions of the 30 deletion breakpoint-spanning sequences that exhibited non-B DNA-forming sequence motifs.

**b:** The control sequences comprised 200 fragments of 300-bp each. The control sequences do not flank any known atypical *NFI* deletion breakpoints. The corresponding sequences are located within 17q11.2 telomeric to *SUZ12P* (genomic position: 29,118,000-29,148,000; hg19) and between *RAB11FIP4* and *COPRS* (30,020,000-30,050,000; hg19). In total, the control dataset encompassed 60-kb of genomic DNA. In parentheses are indicated the proportions of the 200 sequence fragments that exhibited specific non-B DNA-forming sequence motifs.

**c:** The two-tailed Fisher's Exact test was applied to calculate the statistical significance of the differences in the number of non-B DNA motifs observed in the breakpoint-flanking sequences of deletion breakpoints and in the control dataset.

**d:** Some sequences from the investigated datasets fulfill the criteria for more than one non B-DNA motif subtype, i.e. 'TTAATTAATTAA' represents a short tandem repeat (2–6-bp sequence repeated several times) as well as a cruciform repeat which is a subtype of an inverted repeat of  $\geq 6$ -bp separated by 0–4-bp. Therefore, the number of sequences exhibiting non-B DNA subtypes exceeds the number of sequences with at least one non-B DNA-forming motif.

**Table S6:** Numbers of direct and inverted repeats identified within 150-bp flanking the breakpoints of the 15 atypical *NFI* deletions with simple breakpoints on both sides as compared with the numbers of such repeats identified within a control dataset of sequences not harbouring *NFI* deletion breakpoints. MEME suite (<http://meme.nbcr.net/meme/>) was used to analyse repeats  $\geq 6$ -bp up to 150-bp. The number of base-pairs between the repeats was not restricted to a specific length.

| Number of repeats | Number of deletion breakpoint-flanking sequences exhibiting the indicated number of repeats <sup>a</sup> | Number of control sequences that exhibit the indicated number of repeats <sup>b</sup> | P-value <sup>c</sup> |
|-------------------|----------------------------------------------------------------------------------------------------------|---------------------------------------------------------------------------------------|----------------------|
| 1–6 DR            | 23 (77%)                                                                                                 | 161 (80.5%)                                                                           |                      |
| 0 DR              | 7                                                                                                        | 39                                                                                    | 0.627                |
| 1 DR              | 12                                                                                                       | 51                                                                                    | 0.123                |
| 2 DR              | 3                                                                                                        | 50                                                                                    | 0.101                |
| 3 DR              | 4                                                                                                        | 37                                                                                    | 0.615                |
| 4 DR              | 2                                                                                                        | 16                                                                                    | 0.999                |
| 5 DR              | 1                                                                                                        | 7                                                                                     | 0.999                |
| 6 DR              | 2                                                                                                        | 0                                                                                     |                      |
| 1–6 IR            | 23 (77%)                                                                                                 | 161 (80.5%)                                                                           |                      |
| 0 IR              | 8                                                                                                        | 39                                                                                    | 0.342                |
| 1 IR              | 14                                                                                                       | 68                                                                                    | 0.220                |
| 2 IR              | 6                                                                                                        | 53                                                                                    | 0.510                |
| 3 IR              | 3                                                                                                        | 30                                                                                    | 0.586                |
| 4 IR              | 0                                                                                                        | 8                                                                                     |                      |
| 5 IR              | 0                                                                                                        | 1                                                                                     |                      |
| 6 IR              | 0                                                                                                        | 1                                                                                     |                      |

DR: direct repeat(s); IR: inverted repeat(s).

**a:** In total, we investigated 30 breakpoint-flanking sequences of 300-bp each. These 300-bp regions comprise 150-bp centromeric and 150-bp telomeric to each *NFI* deletion breakpoint.

**b:** The control sequences were located within 17q11.2 telomeric to *SUZ12P* (genomic position: 29,118,000-29,148,000; hg19) and between *RAB11FIP4* and *COPRS* (30,020,000-30,050,000; hg19). In total, the control dataset comprised 60-kb of genomic DNA including 200 fragments of 300-bp each.

**c:** The two-tailed Fisher's Exact test was applied to calculate the statistical significance of the differences in the number of direct and inverted repeats observed in the breakpoint-flanking sequences of the deletion breakpoints and in the control dataset.

**Table S7:** Direct and inverted repeats (>150-bp, sequence homology of  $\geq 87\%$ ) located within 2-kb regions flanking the 15 atypical *NFI* deletion breakpoints on both sides. The repeats were identified by means of BLASTN self-alignments of the 4-kb regions (<http://blast.ncbi.nlm.nih.gov/Blast.cgi>) (bl2seq<sup>a</sup>).

| Patient  | Breakpoint location | Length of repeat (retrotransposon)                              | Genomic position of the region of homology between the repeats | Sequence homology between the repeats | Distance between the repeats | Orientation of the repeats |
|----------|---------------------|-----------------------------------------------------------------|----------------------------------------------------------------|---------------------------------------|------------------------------|----------------------------|
| D05.2678 | 28,142,439          | 292-bp ( <i>AluSx1</i> <sup>b</sup> )<br>288-bp ( <i>AluY</i> ) | 28,140,555-28,140,846<br>28,141,173-28,141,460                 | 88%                                   | 327-bp                       | direct                     |
| D0801587 | 29,729,878          | 316-bp ( <i>AluY</i> )<br>311-bp ( <i>AluSc8</i> <sup>b</sup> ) | 29,729,627-29,729,942<br>29,730,329-29,730,639                 | 88%                                   | 388-bp                       | direct                     |
|          |                     | 285-bp ( <i>AluY</i> )<br>285-bp ( <i>AluY</i> )                | 29,728,004-29,728,288<br>29,729,659-29,729,943                 | 88%                                   | 1,372-bp                     | inverted                   |
| D0801587 | 27,726,516          | 279-bp ( <i>AluSp</i> )<br>281-bp ( <i>AluSq2</i> )             | 27,725,223-27,725,501<br>27,725,547-27,725,827                 | 89%                                   | 47-bp                        | direct                     |
| R48018   | 29,084,006          | 245-bp ( <i>AluSg</i> )<br>244-bp ( <i>AluSg</i> <sup>b</sup> ) | 29,082,933-29,083,177<br>29,084,829-29,085,072                 | 87%                                   | 1,653-bp                     | direct                     |
| R84329   | 29,074,557          | 292-bp ( <i>AluYf4</i> )<br>285-bp ( <i>AluY</i> )              | 29,073,481-29,073,772<br>29,074,182-29,074,466                 | 89%                                   | 411-bp                       | direct                     |

**a:** The sequence alignments were performed using default settings for the algorithm parameters: Expect threshold: 10, word size: 28 and match/mismatch scores: 1, -2. The following parameters were however not run under default settings but instead adjusted to the requirements of our analysis: the parameter ‘number of maximum target sequences’ was increased from 100 (default) to 20,000 so that all sequence alignments were displayed. The parameter ‘maximum matches in a query’ was changed from 0 (default) to 100 in order to identify all possible matches to the query sequence. The parameter ‘gap costs’ was changed from the default setting ‘linear’ to ‘existence: 5 and extension: 2’. These settings imply that the cost to open a gap scores -5 whereas the cost to extend the gap scores -2. By adopting these settings, we reduced the number of gaps that would extend the length of the alignment at the expense of the sequence identity.

**b:** Full-length retrotransposon.

**Table S8:** Direct and inverted repeats (>150-bp, sequence homology of  $\geq 87\%$ ) within the control dataset of 120-kb<sup>a</sup>. The repeats were identified by means of BLASTN self-alignments of 4-kb regions (<http://blast.ncbi.nlm.nih.gov/Blast.cgi>) (bl2seq<sup>a</sup>).

| Control regions <sup>b</sup> | Position of the hypothetical breakpoint | Length of repeat (retrotransposon)   | Genomic position of repeat | Homology between repeats | Distance between repeats | Orientation of the repeat |
|------------------------------|-----------------------------------------|--------------------------------------|----------------------------|--------------------------|--------------------------|---------------------------|
| K14                          | 30,046,000                              | 276-bp ( <i>AluY</i> )               | 30,044,724-30,044,999      | 87%                      | 989-bp                   | inverted                  |
|                              |                                         | 276-bp ( <i>AluY</i> )               | 30,045,987-30,046,262      |                          |                          |                           |
| K16                          | 29,152,000                              | 284-bp ( <i>AluSg</i> )              | 29,150,105-29,150,388      | 87%                      | 2,124-bp                 | direct                    |
|                              |                                         | 282-bp ( <i>AluSx1</i> )             | 29,152,511-29,152,792      |                          |                          |                           |
| K21                          | 29,172,000                              | 298-bp ( <i>AluSx</i> )              | 29,171,140-29,171,437      | 87%                      | 1,979-bp                 | direct                    |
|                              |                                         | 293-bp ( <i>AluSc</i> )              | 29,173,415-29,173,707      |                          |                          |                           |
| K23                          | 29,180,000                              | 194-bp ( <i>AluSx</i> )              | 29,178,002-29,178,195      | 88%                      | 1,812-bp                 | direct                    |
|                              |                                         | 191-bp ( <i>AluSx1</i> )             | 29,180,006-29,180,196      |                          |                          |                           |
| K26                          | 29,192,000                              | 305-bp ( <i>AluY</i> <sup>c</sup> )  | 29,190,379-29,190,683      | 89%                      | 1,503-bp                 | direct                    |
|                              |                                         | 305-bp ( <i>AluY</i> <sup>c</sup> )  | 29,192,185-29,192,489      |                          |                          |                           |
| K28                          | 29,200,000                              | 261-bp ( <i>AluSx1</i> )             | 29,198,407-29,198,667      | 87%                      | 2,619-bp                 | inverted                  |
|                              |                                         | 257-bp ( <i>AluSc5</i> )             | 29,201,279-29,201,535      |                          |                          |                           |
|                              |                                         | 256-bp ( <i>AluSx1</i> )             | 29,198,401-29,198,656      | 87%                      | 3,028-bp                 | direct                    |
|                              |                                         | 252-bp ( <i>AluSg</i> )              | 29,201,684-29,201,935      |                          |                          |                           |
| K30                          | 29,208,000                              | 295-bp ( <i>AluSp</i> )              | 29,207,345-29,207,639      | 88%                      | 1,358-bp                 | direct                    |
|                              |                                         | 292-bp ( <i>AluSp</i> <sup>c</sup> ) | 29,208,996-29,209,287      |                          |                          |                           |

**a:** The sequence alignments were performed using default settings for the algorithm parameters: Expect threshold: 10, word size: 28 and match/mismatch scores: 1, -2. The following parameters were however not run under default settings but instead adjusted to the requirements of the analysis; the parameter ‘number of maximum target sequences’ was increased from 100 (default) to 20,000 so that all sequence alignments were displayed. The parameter ‘maximum matches in a query’ was changed from 0 (default) to 100 in order to identify all possible matches to the query sequence. The parameter ‘gap costs’ was changed from the default setting ‘linear’ to ‘existence: 5 and extension: 2’. These settings imply that the cost to open a gap scores -5 whereas the cost to extend the gap scores -2. By adopting these settings, we reduced the number of gaps that would extend the length of the alignment at the expense of the sequence identity.

**b:** The control dataset comprises two genomic regions: one is located telomeric to *SUZ12P* (genomic position: 29,118,000-29,210,000; 92-kb), the other between *RAB11FIP4* and *COPRS* (genomic position: 30,020,000-30,048,000; 28-kb). The total 120-kb of genomic DNA were subdivided into 30 regions of 4-kb each and hypothetical breakpoints were assigned locations between nucleotides at positions 2,000 and 2,001 of each of these 4-kb fragments. Only seven of these 30 control regions (K1-K30) contained direct or inverted repeats as indicated in the first column.

**c:** Full-length retrotransposon.



**Table S9:** Number of direct and inverted sequence repeats >150-bp within the breakpoint-flanking regions of the 15 atypical *NFI* deletions with simple breakpoints as compared with the number of such repeats in a control dataset of sequences.

| Sequence feature investigated | Number of <i>NFI</i> deletion breakpoint-flanking sequences with repeats <sup>a</sup> | Number of control sequences with repeats <sup>a</sup> | P-value <sup>b</sup> |
|-------------------------------|---------------------------------------------------------------------------------------|-------------------------------------------------------|----------------------|
| Direct repeat (>150-bp)       | 5/30 (17%)                                                                            | 6/30 (20%)                                            | 0.99                 |
| Inverted repeat (>150-bp)     | 1/30 (3%)                                                                             | 2/30 (7%)                                             | 0.99                 |

**a:** The number of direct and inverted repeats >150-bp exhibiting  $\geq 87\%$  sequence homology was determined by BLASTN self-alignments of 2-kb regions flanking the deletion breakpoint regions on both sides. The number of such repeats was also determined in a control dataset of sequences derived from two genomic regions: one is located telomeric to *SUZ12P* (genomic position: 29,118,000-29,210,000; 92-kb), the other between *RAB11FIP4* and *COPRS* (genomic position: 30,020,000-30,048,000; 28-kb). In total, these two regions comprise 120-kb of genomic DNA which were subdivided into 30 fragments of 4-kb each. Hypothetical breakpoints were assigned locations between nucleotides at positions 2,000 and 2,001 of each of these 4-kb fragments.

**b:** The two-tailed Fisher's Exact test was applied to assess the statistical significance of the differences in the number of repeats observed.

**Table S10:** Identification of inverted repeats  $\geq 1$ -kb located within 40-kb flanking the atypical *NFI* deletion breakpoints. The 40-kb sequence fragments analysed spanned 20-kb centromeric and 20-kb telomeric to each deletion breakpoint. To identify repeats  $\geq 1$ -kb, we performed BLASTN self-alignments of the 40-kb fragments under the search conditions “highly similar sequences”. Each of these 40-kb sequence fragments was downloaded from the reference sequence of the human genome (hg19). Inverted repeats  $\geq 1$ -kb were only identified in breakpoint-flanking regions of patients 619 and 659 as indicated. The respective repeats exhibited 99% sequence homology.

| Patient | Proximal deletion breakpoint |                                |                                                 |
|---------|------------------------------|--------------------------------|-------------------------------------------------|
|         | Position of breakpoint       | Length of the inverted repeats | Genomic position of the inverted repeats (hg19) |
| 619     | 28,946,218                   | 5735-bp                        | 28,943,147-28,948,899                           |
|         |                              | 5762-bp                        | 28,952,608-28,958,368                           |
| 659     | 28,948,946 <sup>a</sup>      | 5735-bp                        | 28,943,147-28,948,899                           |
|         |                              | 5762-bp                        | 28,952,608-28,958,368                           |

a: Breakpoint located between inverted repeats.

**Table S11:** Comparison of the number of retrotransposons located at or directly adjacent to the breakpoints of 15 atypical *NFI* deletions with the number of such elements identified in the control dataset.

|                                         | Number of retrotransposons in the                              |                              | P-value <sup>c</sup> |
|-----------------------------------------|----------------------------------------------------------------|------------------------------|----------------------|
|                                         | <i>NFI</i> deletion breakpoint-flanking sequences <sup>a</sup> | Control dataset <sup>b</sup> |                      |
| <b>All retrotransposons<sup>d</sup></b> | 22                                                             | 136                          | 0.67                 |
| <b>LTR elements</b>                     | 1                                                              | 5                            | 0.57                 |
| <b>Non-LTR retrotransposons:</b>        |                                                                |                              |                      |
| LINE elements                           | 3                                                              | 47                           | 0.15                 |
| SINE elements                           | 18                                                             | 84                           | 0.08                 |
| <i>Alu</i> <sup>e</sup>                 | 17                                                             | 75                           | 0.07                 |
| FLAM_C <sup>f</sup>                     | 1                                                              | 3                            | 0.43                 |
| FRAM <sup>f</sup>                       | 0                                                              | 1                            |                      |
| MIR                                     | 0                                                              | 5                            |                      |

**a:** The *NFI* deletion breakpoint dataset included 30 sequence fragments of 300-bp flanking the breakpoints of the 15 atypical *NFI* deletions. The breakpoints were located between nucleotides 150 and 151 of each of these 300-bp fragments. In our analysis, we considered those retrotransposons that overlapped the breakpoints or which were located immediately adjacent to the breakpoints.

**b:** The control dataset included 200 sequence fragments of 300-bp that are located in 17q11.2 within genomic regions not harbouring known atypical *NFI* deletion breakpoints. The control sequence dataset comprised two 30-kb regions, one located telomeric to *SUZ12P* (genomic position: 29,118,000-29,148,000; hg19) and the other located between *RAB11FIP4* and *COPRS* (30,020,000-30,050,000; hg19). The 60-kb of genomic DNA sequences were subdivided into two hundred 300-bp regions and hypothetical breakpoints were assigned locations between nucleotides 150 and 151 of each of these 300-bp fragments.

**c:** The two-tailed Fisher's Exact test was applied to assess the statistical significance of the differences between the number of elements observed in the two datasets.

**d:** LTR and non-LTR retrotransposons (LINE and SINE)

**e:** Full-length and partial *Alu* elements

**f:** FLAM\_C: free left *Alu* monomer; FRAM: free right *Alu* monomer

**Table S12:** The SVA elements inserted at the deletion breakpoints in patient DA-77 and ASB4-55 were PCR amplified with primers located within non-deleted regions flanking the SVA elements on both sides. For this purpose, we used long PCR primers with a high melting temperature and high GC-content as summarized below.

| Patient | designation | Primer                      |             |                                       |                             |
|---------|-------------|-----------------------------|-------------|---------------------------------------|-----------------------------|
|         |             | sequence (5'→3')            | length (bp) | melting temperature (°C) <sup>a</sup> | GC-content (%) <sup>a</sup> |
| ASB4-55 | as117for    | CCCAGAATCCATAGTTACCAGATTCA  | 27          | 68.2                                  | 41                          |
|         | as146Brev   | TGATCTACTGACAGGTTACCCTTGGA  | 26          | 68.2                                  | 46                          |
| DA-77   | GSP1_for    | TTTTAGGCAGCATGGGGTATGTTCTG  | 26          | 70.1                                  | 46                          |
|         | GSP1_rev    | TCTGATCATCCATACGTGACACACTGA | 27          | 69.7                                  | 44                          |

a: melting temperature and GC-content were determined with the RaW-program (<http://www.mrc-holland.com/>).

The Expand Long Template PCR system (Roche, Mannheim, Germany) was used to perform the PCR with the addition of 10% DMSO and an annealing temperature of 58°C. The genomic DNA used as PCR template was diluted with water to 40 ng/μl and added to the PCR to a final amount of 400 ng. The initial denaturation of the genomic DNA was performed for 10 minutes.

**Table S13:** Somatic mosaicism of cells harbouring the atypical *NF1* deletion and normal cells was detected in 10 of the 17 patients analysed (indicated in bold and marked in grey). Eight of these patients were investigated by FISH and six exhibited somatic mosaicism. The analysis of microsatellite markers and markers detecting a polymorphic insertion/deletion (indel) located within the deletion region revealed somatic mosaicism in four additional patients who were not investigated by FISH. In these four patients, mosaicism was detected by marker heterozygosity.

| Patient ID                              | Mosaicism investigated by            |                                   |                                         |
|-----------------------------------------|--------------------------------------|-----------------------------------|-----------------------------------------|
|                                         | FISH<br>% cells with the<br>deletion | microsatellite<br>marker analysis | indel marker<br>rs17884042 <sup>a</sup> |
| R48018                                  | 100%                                 | ni                                | ni                                      |
| 619                                     | 100%                                 | ni                                | ni                                      |
| <b>R84329</b>                           | 98.5%                                | nd                                | nd                                      |
| <b>Grandmother of DA-77<sup>b</sup></b> | 75%                                  | nd                                | nd                                      |
| <b>659</b>                              | 96% <sup>c</sup>                     | ni                                | nd                                      |
| <b>Ak-47055</b>                         | 80%                                  | + <sup>d</sup>                    | ni                                      |
| <b>100206</b>                           | 71%                                  | + <sup>e</sup>                    | nd                                      |
| <b>ASB4-55</b>                          | 93%                                  | + <sup>f</sup>                    | nd                                      |
| <b>D0801587</b>                         | nd                                   | + <sup>e</sup>                    | nd                                      |
| <b>08D2261</b>                          | nd                                   | ni                                | +                                       |
| <b>61541</b>                            | nd                                   | ni                                | +                                       |
| <b>D06.1047</b>                         | nd                                   | ni                                | +                                       |
| 2535                                    | nd                                   | ni                                | nd                                      |
| 1106                                    | nd                                   | ni                                | ni                                      |
| D1008345                                | nd                                   | ni                                | ni                                      |
| D05.2678                                | nd                                   | ni                                | ni                                      |
| 70969                                   | nd                                   | ni                                | ni                                      |

ni: not informative, heterozygosity was not detected.

nd: not determined

**a:** Somatic mosaicism was investigated by PCR and sequence analysis of the insertion/deletion (indel) polymorphism rs17884042 (-/ACAAAAATATTTTGA, 29,533,692-29,533,706) located within the *NF1* gene. PCR was performed to amplify the allele lacking the 15-bp by means of primers InDel1f (5'-CACCCAGCAATACGAATG-3', 29,533,366-29,533,383) and InDel2r (5'-AAACGTGAGAGGCTAATCAAAAAGT-3', 29,533,701-29,533,722). The allele harbouring the 15-bp insertion was amplified with primer InDel1f and primer InDel3r (5'-CCCAAACGTGAGAGGCTAATCAAAAATA-3', 29,533,699-29,533,726).

**b:** Peripheral blood of the grandmother of patient DA-77 was investigated by FISH analysis.

**c:** In patient 659, FISH detected the deletion in 96% of blood cells and in 52% of buccal epithelial cells.

**d:** Heterozygosity was detected for markers NF1.PCR3, D17S2237, IVs27AC28.4, D17S1166 and D17S1800.

**e:** Heterozygosity was detected for marker 3'NF1 (29,919,355-29,919,599) amplified with primers 5'-CTTCCATGGCTGCTAACATC-3' and 5'-CCCTGTGGTGTAGTTCAACA-3'.

**f:** Heterozygosity was detected for markers D17S1849, IVs27TG24.8, IVs27AC28.4, D17S1166 and D17S1800. All genomic positions are according to hg19.

**Table S14:** Primers used for the PCR experiments performed to assess the putative SVA element insertion/deletion polymorphism in *SUZ12P* intron 8 in 50 Africans and 50 white Europeans. The genomic DNAs used for these experiments were derived from the human variation panels MGP00008 and MGP00013 (Coriell Cell Repositories, Camden, NJ, USA) and white Europeans from Germany.

| <b>Primer designation</b> | <b>Sequence (5'→3')</b>     | <b>Genomic position (hg19)</b>             |
|---------------------------|-----------------------------|--------------------------------------------|
| AD91for                   | CTGGTGACAGCGAGACTCTG        | 29,099,439-29,099,458<br>(chromosome 17)   |
| SVA4rev                   | GAAAATGTATTTAAATGTCTGCACCAA | 101,596,855-101,596,881<br>(chromosome 10) |
| ASB4SVA1for               | CCCCAGAATTCCATAGTTACCAGA    | 29,102,523-29,102,546<br>(chromosome 17)   |
| ASB4SVA1rev               | TGCTCGTTAAGAATCATCACCAAT    | 123,169,120-123,169,143<br>(chromosome 6)  |

**Table S15:** Primers used for the PCR experiments performed to investigate whether chromosomes 17 harbouring the SVA insertions within *SUZ12P* intron 8 but not the large *NFI* deletions would be detectable in the grandmother of patient DA-77 and in patient ASB4-55. Both patients exhibit somatic mosaicism with normal cells and those with the atypical *NFI* deletions.

| Patient analysed             | Primer designation | Primer sequence (5'→3')     | Chromosomal position (hg19) of the primer |
|------------------------------|--------------------|-----------------------------|-------------------------------------------|
| Grandmother of patient DA-77 | SVA4rev            | GAAAATGTATTTAAATGTCTGCACCAA | 101,596,855-101,596,881 (chromosome 10)   |
|                              | SVA11for           | ACATTTTCTGGTATAACCACCATACA  | 29,099,681-29,099,706 (chromosome 17)     |
|                              | SVA11rev           | TTCAAGCAAAAATAATCAATGC      | 29,100,193-29,100,214 (chromosome 17)     |
|                              | SVA12for           | GCGTTTGTCTTATCACTCAGGA      | 30,101,302-30,101,323 (chromosome 17)     |
|                              | SVA12rev           | GGGAAACTTGGGAAACAGAA        | 30,101,871-30,101,890 (chromosome 17)     |
|                              | SVA13for           | TGGAATTATTGGTGCAGACATT      | 101,596,847-101,596,868 (chromosome 10)   |
|                              | SVA13rev           | TGCCCATTTCTTCTATTGGGCAAC    | 29,101,596-29,101,618 (chromosome 17)     |
|                              | SVA14for           | ACACATGCTGGAATTATTGGTGCAGA  | 101,596,839-101,596,864 (chromosome 10)   |
|                              | GSP1for            | TTTTAGGCAGCATGGGGTATGTTCTG  | 29,099,021-29,099,046 (chromosome 17)     |
|                              | AD75for            | TCCAGACCCATCTGAACATCT       | 30,099,005-30,099,025 (chromosome 17)     |
| ASB4-55                      | AD21rev            | GTGCTCTGCTTGGCCTATTC        | 30,103,669-30,103,688 (chromosome 17)     |
|                              | ASB4SVA1rev        | TGCTCGTTAAGAATCATCACCAAT    | 123,169,120-123,169,143 (chromosome 6)    |
|                              | ASB4SVA2for        | AAAGACCCTGCTGACAAAACA       | 29,969,639-29,969,659 (chromosome 17)     |
|                              | ASB4SVA2rev        | TGAGATGGTGCCATTATACTCC      | 29,970,067-29,970,088 (chromosome 17)     |
|                              | ASB4SVA3for        | GTTTCCCTAAGACAAGCATTGTAAC   | 29,102,642-29,102,666 (chromosome 17)     |
|                              | ASB4SVA3rev        | CATTTGGGGAAGAAAACATCAA      | 29,103,475-29,103,496 (chromosome 17)     |
|                              | ASB4SVA4for        | TGAGATTAGGGATTGGTGATGA      | 123,169,109-123,169,130 (chromosome 6)    |
|                              | ASB4SVA4rev        | TTAGCATTTGGGGAAGAAAACATCAA  | 29,103,475-29,103,500 (chromosome 17)     |
|                              | ASB4SVA5for        | CTTTCTACACAGACACGGCAACCATC  | 123,169,331-123,169,356 (chromosome 6)    |

The Expand Long Template PCR system (Roche) was used to perform the PCRs with the addition of 10% DMSO. The genomic DNA used as PCR template was diluted at 40ng/μl with water and added to the PCR to a final amount of 400ng. The initial denaturation of the genomic DNA was performed for 10 minutes. Different elongation times were tested in order to amplify not only 5' truncated (and hence shorter) SVA element insertions but also full-length SVA elements putatively inserted into *SUZ12P* intron 8 or within the intergenic region between *RAB11FIP4* and *COPRS*.

**Table S16:** Preponderance of the telomeric atypical *NF1* deletion breakpoints in the genomic region extending from position 30,218,204-30,250,762 (region 1).

| Genomic regions analysed <sup>a</sup> |                                                                          | Observed number of breakpoints located within the region | Expected number of breakpoints within the region <sup>b</sup> | P-value <sup>c</sup> |
|---------------------------------------|--------------------------------------------------------------------------|----------------------------------------------------------|---------------------------------------------------------------|----------------------|
| No.                                   | Location (extent)                                                        |                                                          |                                                               |                      |
| 1                                     | 30,218,204-30,250,762 (32,559-bp)                                        | 5                                                        | 1                                                             | <0.0001              |
| 2                                     | 29,729,878-30,218,203 (488,326-bp) and 30,250,763-30,345,260 (94,498-bp) | 10                                                       | 14                                                            |                      |

**a:** The telomeric breakpoints of all 15 atypical *NF1* deletions considered are located within a region spanning 615,383-bp. The most centromeric breakpoint is located at position 29,729,878 (patient D0801587) and the most telomeric breakpoint is located at position 30,345,260 (patient 659). Patients 619 and D05.2678 were not included in the analysis because their telomeric deletion breakpoints were not located within the region between NF1-REPa and NF1-REPC but instead were located 1.53-Mb and 3.69-Mb telomeric to NF1-REPC, respectively. The 615,383-bp region harbouring all 15 telomeric breakpoints was subdivided into two regions: region 1 (32,559-bp) and region 2 (582,824-bp).

**b:** The expected number of breakpoints within region 1 was determined as follows: A total of 15 breakpoints were observed to be located within 615,383-bp. The proportion of the entire 615,383-bp corresponding to region 1 is 0.05 and the proportion corresponding to region 2 is 0.95. Under the assumption of an equal number of breakpoints in both regions 1 and 2, the expected number of breakpoints in region 1 is N=1 (0.05 x 15) and in region 2: N=14 (0.95 x 15).

**c:** The chi-squared test (one degree of freedom) was used to calculate the significance of the difference between the observed versus the expected number of breakpoints.



**Table S17:** Preponderance of the centromeric atypical *NF1* deletion breakpoints in *SUZ12P* (region 1, extending from position 29,065,415 to position 29,104,496).

| No. | Genomic regions analysed <sup>a</sup><br>Location (extent)                   | Observed number of breakpoints<br>located within the region | Expected number of<br>breakpoints within the region <sup>b</sup> | P-value <sup>c</sup> |
|-----|------------------------------------------------------------------------------|-------------------------------------------------------------|------------------------------------------------------------------|----------------------|
| 1   | 29,065,415-29,104,496 (39,082-bp)                                            | 11                                                          | 2                                                                | <0.0001              |
| 2   | 28,946,218-29,065,414 (119,197-bp) and<br>29,104,497-29,264,225 (159,729-bp) | 4                                                           | 13                                                               |                      |

**a:** The centromeric breakpoints of all 15 atypical *NF1* deletions considered are located in a region spanning 318,008-bp. The most centromeric breakpoint is located at position 28,946,218 (patient 619) and the most telomeric breakpoint is located at position 29,264,225 (patient D06.1047). Patients D05.2678 and D0801587 were not included in the analysis because their centromeric deletion breakpoints were not located within the region between NF1-REPa and NF1-REPC but instead were located 785-kb and 1.2-Mb centromeric to NF1-REPa, respectively. The 318,008-bp region harbouring all 15 centromeric breakpoints was subdivided into two regions: region 1 (39,082-bp) and region 2 (278,926-bp).

**b:** The expected number of breakpoints within region 1 was determined as follows: A total of 15 breakpoints were observed to be located within 318,008-bp. The proportion of the entire 318,008-bp corresponding to region 1 is 0.12 and the proportion corresponding to region 2 is 0.88. Under the assumption of an equal number of breakpoints in both regions 1 and 2, the expected number of breakpoints in region 1 is  $N=2$  ( $0.12 \times 15$ ) and in region 2, the expected number of breakpoints is  $N=13$  ( $0.88 \times 15$ ).

**c:** The chi-squared test (one degree of freedom) was used to calculate the significance of the difference between the observed versus the expected numbers of breakpoints.

**Table S18:** Locations of the breakpoints of the 11 atypical *NFI* deletions within *SUZ12P* and in relation to the location of the breakpoint regions of type-2 *NFI* deletions according to Vogt et al., (2012).

| Patients with type-2 <i>NFI</i> deletions (genomic locations of the type-2 breakpoint regions) <sup>a</sup> |                         | Patients with atypical deletions (position of the breakpoints) | Distance between the atypical <i>NFI</i> deletion breakpoint and the breakpoint region of the type-2 <i>NFI</i> deletion given in in the same line |
|-------------------------------------------------------------------------------------------------------------|-------------------------|----------------------------------------------------------------|----------------------------------------------------------------------------------------------------------------------------------------------------|
| 811-M                                                                                                       | (29,069,025-29,069,071) | 100206 (29,065,415)                                            | 3,611-bp                                                                                                                                           |
| KCD                                                                                                         | (29,071,185-29,071,293) |                                                                |                                                                                                                                                    |
| R605111                                                                                                     | (29,073,072-29,073,315) | R84329 (29,074,557)                                            | 1,243-bp                                                                                                                                           |
| 697                                                                                                         | (29,076,187-29,076,255) |                                                                |                                                                                                                                                    |
| R323001                                                                                                     | (29,077,548-29,077,693) |                                                                |                                                                                                                                                    |
| 2442                                                                                                        | (29,078,929-29,078,979) |                                                                |                                                                                                                                                    |
| 736                                                                                                         | (29,080,465-29,080,552) | Ak-45077 (29,082,023)                                          | 1,472-bp                                                                                                                                           |
| 736                                                                                                         | (29,080,465-29,080,552) | 61541 (29,082,032)                                             | 1,481-bp                                                                                                                                           |
| 1630                                                                                                        | (29,084,697-29,084,825) | R48018 (29,084,006)                                            | 692-bp                                                                                                                                             |
| R45407                                                                                                      | (29,084,697-29,084,825) |                                                                |                                                                                                                                                    |
| R164101                                                                                                     | (29,085,517-29,085,686) |                                                                |                                                                                                                                                    |
| 2358                                                                                                        | (29,085,789-29,086,051) |                                                                |                                                                                                                                                    |
| R368101                                                                                                     | (29,085,789-29,086,051) |                                                                |                                                                                                                                                    |
| 585                                                                                                         | (29,085,789-29,086,051) |                                                                |                                                                                                                                                    |
| 488                                                                                                         | (29,087,423-29,087,479) |                                                                |                                                                                                                                                    |
| R636011                                                                                                     | (29,087,423-29,087,479) |                                                                |                                                                                                                                                    |
| 1502                                                                                                        | (29,087,632-29,087,779) |                                                                |                                                                                                                                                    |
| 1956                                                                                                        | (29,088,369-29,088,400) |                                                                |                                                                                                                                                    |
| R690001                                                                                                     | (29,090,564-29,090,621) |                                                                |                                                                                                                                                    |
| D0703976#4                                                                                                  | (29,091,112-29,091,232) |                                                                |                                                                                                                                                    |
| D0900751#7                                                                                                  | (29,091,112-29,091,232) |                                                                |                                                                                                                                                    |
| IL39                                                                                                        | (29,091,380-29,091,426) |                                                                |                                                                                                                                                    |
| 1104                                                                                                        | (29,091,476-29,091,551) |                                                                |                                                                                                                                                    |
| R39407                                                                                                      | (29,091,628-29,091,737) |                                                                |                                                                                                                                                    |
| R55816                                                                                                      | (29,092,785-29,092,963) | 70969 (29,092,903)                                             | overlapping <sup>b</sup>                                                                                                                           |
| R55816                                                                                                      | (29,092,785-29,092,963) | D1008345 (29,094,424)                                          | 1,462-bp                                                                                                                                           |
| 2429                                                                                                        | (29,098,821-29,099,182) |                                                                |                                                                                                                                                    |
| R286011                                                                                                     | (29,099,490-29,099,591) |                                                                |                                                                                                                                                    |
| R53327                                                                                                      | (29,099,719-29,099,793) | DA-77 (29,100,005)                                             | 213-bp                                                                                                                                             |
| R716111                                                                                                     | (29,100,541-29,100,765) |                                                                |                                                                                                                                                    |
| R320021                                                                                                     | (29,100,541-29,100,765) |                                                                |                                                                                                                                                    |
| WB                                                                                                          | (29,101,104-29,101,356) |                                                                |                                                                                                                                                    |
| UC172                                                                                                       | (29,101,104-29,101,356) |                                                                |                                                                                                                                                    |
| R24026                                                                                                      | (29,101,104-29,101,356) |                                                                |                                                                                                                                                    |
| R20807                                                                                                      | (29,101,104-29,101,356) | 2535 (29,101,686)                                              | 331-bp                                                                                                                                             |
| R93418                                                                                                      | (29,102,982-29,103,195) | 08D2261 (29,102,848)                                           | 135-bp                                                                                                                                             |
| R93418                                                                                                      | (29,102,982-29,103,195) | ASB4-55 (29,103,071)                                           | overlapping <sup>b</sup>                                                                                                                           |
| 938                                                                                                         | (29,103,520-29,103,590) |                                                                |                                                                                                                                                    |
| R37716                                                                                                      | (29,104,990-29,105,048) |                                                                |                                                                                                                                                    |
| R928201                                                                                                     | (29,105,197-29,105,339) |                                                                |                                                                                                                                                    |
| R491021                                                                                                     | (29,105,417-29,105,549) |                                                                |                                                                                                                                                    |
| R465111                                                                                                     | (29,105,417-29,105,549) |                                                                |                                                                                                                                                    |

**a:** Type-2 *NFI* deletions are mediated by nonallelic homologous recombination between *SUZ12* and *SUZ12P*. The breakpoints of the respective deletions cannot be assigned to single base-pair resolution since the breakpoints occurred in short regions of 100% sequence identity (so called breakpoint regions).

**b:** The breakpoint of the atypical *NFI* deletion is located within the breakpoint region of the type-2 *NFI* deletion.

**Table S19:** Number of non-B DNA-forming sequence motifs located within the breakpoint-flanking regions of the 11 atypical *NFI* deletions with centromeric breakpoints located within *SUZ12P* as compared with the number of such motifs identified within the control sequence dataset.

| Number of sequences exhibiting                              | <i>NFI</i> deletion breakpoint-flanking sequences (N=11) <sup>a</sup> | Control sequences (N=200) <sup>b</sup> | P-value <sup>c</sup> |
|-------------------------------------------------------------|-----------------------------------------------------------------------|----------------------------------------|----------------------|
| at least one non-B DNA-forming motif                        | 7 (64%)                                                               | 137 (68.5%)                            | 0.75                 |
| specific subtypes of non-B DNA-forming motifs: <sup>d</sup> |                                                                       |                                        |                      |
| inverted repeat                                             | 0                                                                     | 10 (5%)                                |                      |
| cruciform                                                   | 6 (55%)                                                               | 84 (42%)                               | 0.53                 |
| short tandem repeat                                         | 5 (45%)                                                               | 43 (21.5%)                             | 0.13                 |
| polypurine tract                                            | 1 (9%)                                                                | 25 (12.5%)                             | 0.99                 |
| polypyrimidine tract                                        | 1 (9%)                                                                | 22 (11%)                               | 0.99                 |
| Z-DNA                                                       | 2 (18%)                                                               | 7 (3.5%)                               | 0.07                 |

**a:** Eleven *NFI* deletion breakpoint-flanking sequence fragments were analysed, each encompassing 300-bp. In parentheses are the proportions of the 11 deletion breakpoint-spanning sequences that exhibited non-B DNA-forming sequence motifs.

**b:** The control sequences comprised 200 fragments of 300-bp each. The control sequences do not flank any known atypical *NFI* deletion breakpoints. The corresponding sequences are located within 17q11.2 telomeric to *SUZ12P* (genomic position: 29,118,000–29,148,000; hg19) and between *RAB11FIP4* and *COPRS* (30,020,000–30,050,000; hg19). In total, the control dataset encompassed 60-kb of genomic DNA. In parentheses are indicated the proportions of the 200 sequence fragments that exhibited specific non-B DNA-forming sequence motifs.

**c:** The two-tailed Fisher’s Exact test was applied to calculate the statistical significance of the differences in the number of non-B DNA motifs observed in the breakpoint-flanking sequences of deletion breakpoints and in the control dataset.

**d:** Some sequences from the investigated datasets fulfill the criteria for more than one non B-DNA motif subtype, i.e. ‘TTAATTAATTAA’ represents a short tandem repeat (2–6-bp sequence repeated several times) as well as a cruciform repeat which is a subtype of an inverted repeat of  $\geq 6$ -bp separated by 0–4-bp. Therefore, the number of sequences exhibiting non-B DNA subtypes exceeds the number of sequences with at least one non-B DNA-forming motif.

**Table S20:** Numbers of direct and inverted repeats identified within 150-bp flanking the breakpoints of the 11 atypical *NFI* deletions with centromeric breakpoints located in *SUZ12P* as compared with the numbers of such repeats identified within a control dataset of sequences not harbouring *NFI* deletion breakpoints. MEME suite (<http://meme.nbcr.net/meme/>) was used to analyse repeats  $\geq 6$ -bp up to 150-bp. The number of base-pairs between the repeats was not restricted to a specific length.

| Number of repeats | Number of deletion breakpoint-flanking sequences exhibiting the indicated number of repeats <sup>a</sup> | Number of control sequences that exhibit the indicated number of repeats <sup>b</sup> | P-value <sup>c</sup> |
|-------------------|----------------------------------------------------------------------------------------------------------|---------------------------------------------------------------------------------------|----------------------|
| 1–6 DR            | 8 (73%)                                                                                                  | 161 (80.5%)                                                                           |                      |
| 0 DR              | 3                                                                                                        | 39                                                                                    | 0.461                |
| 1 DR              | 4                                                                                                        | 51                                                                                    | 0.482                |
| 2 DR              | 0                                                                                                        | 50                                                                                    |                      |
| 3 DR              | 3                                                                                                        | 37                                                                                    | 0.440                |
| 4 DR              | 0                                                                                                        | 16                                                                                    |                      |
| 5 DR              | 0                                                                                                        | 7                                                                                     |                      |
| 6 DR              | 1                                                                                                        | 0                                                                                     |                      |
| 1–6 IR            | 9 (82%)                                                                                                  | 161 (80.5%)                                                                           |                      |
| 0 IR              | 2                                                                                                        | 39                                                                                    | 0.999                |
| 1 IR              | 4                                                                                                        | 68                                                                                    | 0.999                |
| 2 IR              | 4                                                                                                        | 53                                                                                    | 0.493                |
| 3 IR              | 1                                                                                                        | 30                                                                                    | 0.999                |
| 4 IR              | 0                                                                                                        | 8                                                                                     |                      |
| 5 IR              | 0                                                                                                        | 1                                                                                     |                      |
| 6 IR              | 0                                                                                                        | 1                                                                                     |                      |

DR: direct repeat(s); IR: inverted repeat(s).

**a:** In total, we investigated 11 centromeric breakpoint-flanking sequences of 300-bp each. These 300-bp regions comprise 150-bp centromeric and 150-bp telomeric to each *NFI* deletion breakpoint.

**b:** The control sequences were located within 17q11.2 telomeric to *SUZ12P* (genomic position: 29,118,000-29,148,000; hg19) and between *RAB11FIP4* and *COPRS* (30,020,000-30,050,000; hg19). In total, the control dataset comprised 60-kb of genomic DNA including 200 fragments of 300-bp each.

**c:** The two-tailed Fisher's Exact test was applied to calculate the statistical significance of the differences in the number of direct and inverted repeats observed in the breakpoint-flanking sequences of the deletion breakpoints and in the control dataset.

**Table S21:** Number of direct sequence repeats >150-bp within the breakpoint-flanking regions of the 11 atypical *NFI* deletions with centromeric breakpoints located in *SUZ12P* as compared with the number of such repeats in a control dataset of sequences.

| Sequence feature investigated | Number of <i>NFI</i> deletion breakpoint-flanking sequences with repeats <sup>a</sup> | Number of control sequences with repeats <sup>a</sup> | P-value <sup>b</sup> |
|-------------------------------|---------------------------------------------------------------------------------------|-------------------------------------------------------|----------------------|
| Direct repeat (>150-bp)       | 2/11 (18%)                                                                            | 6/30 (20%)                                            | 0.99                 |

**a:** The number of direct repeats >150-bp exhibiting  $\geq 87\%$  sequence homology was determined by BLASTN self-alignments of 2-kb regions flanking the deletion breakpoint regions on both sides. The number of such repeats was also determined in a control dataset of sequences derived from two genomic regions: one is located telomeric to *SUZ12P* (genomic position: 29,118,000-29,210,000; 92-kb), the other between *RAB11FIP4* and *COPRS* (genomic position: 30,020,000-30,048,000; 28-kb). In total, these two regions comprise 120-kb of genomic DNA which were subdivided into 30 fragments of 4-kb each. Hypothetical breakpoints were assigned locations between nucleotides at positions 2,000 and 2,001 of each of these 4-kb fragments.

**b:** The two-tailed Fisher's Exact test was applied to assess the statistical significance of the differences in the number of repeats observed.

**Table S22:** SVA insertion-associated deletions in the human genome as compared with the chimpanzee genome according to (Lee et al., 2012).

| <b>Genomic position of the inserted SVA element (hg19)</b> | <b>Deletion size (bp)</b> |
|------------------------------------------------------------|---------------------------|
| Chr 1 160,905,975–160,906,748                              | 1,929                     |
| Chr 3 149,097,867–149,099,196                              | 2,581                     |
| Chr 3 61,656,812–61,658,447                                | 19                        |
| Chr 7 75,581,297–75,582,629                                | 653                       |
| Chr 8 122,668,707–122,669,486                              | 1,191                     |
| Chr 8 57,983,370–57,984,835                                | 14                        |
| Chr 8 145,092,008–145,092,734                              | 4,859                     |
| Chr 8 34,951,832–34,952,650                                | 2,791                     |
| Chr 10 101,851,975–101,854,321                             | 5,997                     |
| Chr 12 31,333,177–31,333,788                               | 347                       |
| Chr 14 84,565,214–84,566,566                               | 8,741                     |
| Chr 16 67,746,159–67,746,860                               | 30                        |
| Chr 22 35,021,272–35,022,965                               | 1,633                     |

**Table S23:** The 17 unrelated NF1 patients harbouring atypical *NF1* deletions investigated in the present study were initially identified in different centres as listed below. Blood-derived genomic DNA was used to analyse the deletion breakpoints. For some of the patients (marked in bold), EBV-transformed lymphoblastoid cell lines were also available for analysis.

| <b>Patient ID</b>                            | <b>Centres</b>                                                                                                                                                                                                           |
|----------------------------------------------|--------------------------------------------------------------------------------------------------------------------------------------------------------------------------------------------------------------------------|
| D06.1047<br>08D2261<br>D05.2678              | Department of Clinical Genetics, Erasmus Medical Centre, Rotterdam,<br>The Netherlands                                                                                                                                   |
| 70969<br>100206<br>61541<br>R84329<br>R48018 | Medical Genomics Laboratory, Department of Genetics, University of<br>Alabama at Birmingham, USA                                                                                                                         |
| <b>DA-77</b>                                 | Division of Clinical Genetics, Medical University Innsbruck, Austria                                                                                                                                                     |
| <b>ASB4-55</b>                               | Molecular Diagnostics Unit, Hereditary Cancer Program, Catalan Institute of<br>Oncology (ICO-IDIBELL), L'Hospitalet de Llobregat, Barcelona, Spain;<br>Department of Human Genetics, Catholic University Leuven, Belgium |
| <b>1106</b><br>D1008345<br>D0801587          | Centre for Medical Genetics, Ghent University Hospital, Belgium                                                                                                                                                          |
| 2535                                         | Institute of Medical Genetics, Cardiff University School of Medicine, UK                                                                                                                                                 |
| Ak-47055                                     | Department of Pediatrics, Duisburg General Hospital, Duisburg, Germany                                                                                                                                                   |
| <b>659</b><br><b>619</b>                     | Department of Neurology, University Medical Centre Hamburg Eppendorf,<br>Germany                                                                                                                                         |

**Table S24:** Extent of the 17 atypical *NF1* deletions according to MLPA analysis using the P122-C1 kit (MRC Holland, The Netherlands). The genomic positions of the respective probes and their complete designation are given in Table S25.

| MLPA-probe          | Patients |       |       |         |         |        |       |      |          |      |        |        |          |     |          |     |          |
|---------------------|----------|-------|-------|---------|---------|--------|-------|------|----------|------|--------|--------|----------|-----|----------|-----|----------|
|                     | D06.1047 | 70969 | DA-77 | ASB4-55 | 08D2261 | 100206 | 61541 | 1106 | D1008345 | 2535 | R84329 | R48018 | Ak-47055 | 659 | D0801587 | 619 | D05.2678 |
| <i>TRAF4</i>        | +        | +     | +     | +       | +       | +      | +     | +    | +        | +    | +      | +      | +        | +   | +        | +   | +        |
| <i>TRAF4</i>        | +        | +     | +     | +       | +       | +      | +     | +    | +        | +    | +      | +      | +        | +   | +        | +   | +        |
| <i>SSH2</i>         | +        | +     | +     | +       | +       | +      | +     | +    | +        | +    | +      | +      | +        | +   | -        | +   | +        |
| <i>SSH2</i>         | +        | +     | +     | +       | +       | +      | +     | +    | +        | +    | +      | +      | +        | +   | -        | +   | +        |
| <i>BLMH</i>         | +        | +     | +     | +       | +       | +      | +     | +    | +        | +    | +      | +      | +        | +   | -        | +   | -        |
| <i>BLMH</i>         | +        | +     | +     | +       | +       | +      | +     | +    | +        | +    | +      | +      | +        | +   | -        | +   | -        |
| <i>CPD</i>          | +        | +     | +     | +       | +       | +      | +     | +    | +        | +    | +      | +      | +        | +   | -        | +   | -        |
| <i>CPD</i>          | +        | +     | +     | +       | +       | +      | +     | +    | +        | +    | +      | +      | +        | +   | -        | +   | -        |
| <i>SUZ12P</i>       | +        | +     | +     | +       | +       | +      | +     | -    | +        | +    | +      | +      | +        | -   | -        | -   | -        |
| <i>SUZ12P</i>       | +        | +     | +     | +       | +       | +      | +     | -    | +        | +    | +      | +      | +        | -   | -        | -   | -        |
| <i>SUZ12P</i>       | +        | +     | +     | +       | +       | -      | -     | -    | +        | +    | -      | -      | -        | -   | -        | -   | -        |
| <i>CRLF3</i>        | +        | -     | -     | -       | -       | -      | -     | -    | -        | -    | -      | -      | -        | -   | -        | -   | -        |
| <i>ATAD5</i>        | +        | -     | -     | -       | -       | -      | -     | -    | -        | -    | -      | -      | -        | -   | -        | -   | -        |
| <i>CENTA2</i>       | +        | -     | -     | -       | -       | -      | -     | -    | -        | -    | -      | -      | -        | -   | -        | -   | -        |
| <i>RNF135</i>       | -        | -     | -     | -       | -       | -      | -     | -    | -        | -    | -      | -      | -        | -   | -        | -   | -        |
| <i>NF1</i> Ex. 1    | -        | -     | -     | -       | -       | -      | -     | -    | -        | -    | -      | -      | -        | -   | -        | -   | -        |
| <i>NF1</i> Ex. 12B  | -        | -     | -     | -       | -       | -      | -     | -    | -        | -    | -      | -      | -        | -   | -        | -   | -        |
| <i>NF1</i> Ex. 23   | -        | -     | -     | -       | -       | -      | -     | -    | -        | -    | -      | -      | -        | -   | -        | -   | -        |
| <i>NF1</i> Ex. 40   | -        | -     | -     | -       | -       | -      | -     | -    | -        | -    | -      | -      | -        | -   | -        | -   | -        |
| <i>NF1</i> Ex. 48   | -        | -     | -     | -       | -       | -      | -     | -    | -        | -    | -      | -      | -        | -   | -        | -   | -        |
| <i>UTP6</i>         | +        | +     | +     | +       | +       | +      | +     | +    | -        | -    | -      | -      | -        | -   | +        | -   | -        |
| <i>JJAZ1</i> Ex. 10 | +        | +     | +     | +       | +       | +      | +     | +    | +        | +    | +      | +      | +        | -   | +        | -   | -        |
| <i>LRRC37B</i>      | +        | +     | +     | +       | +       | +      | +     | +    | +        | +    | +      | +      | +        | +   | +        | -   | -        |
| <i>ZNF207</i>       | +        | +     | +     | +       | +       | +      | +     | +    | +        | +    | +      | +      | +        | +   | +        | -   | -        |
| <i>PSMD11</i>       | +        | +     | +     | +       | +       | +      | +     | +    | +        | +    | +      | +      | +        | +   | +        | -   | -        |
| <i>PSMD11</i>       | +        | +     | +     | +       | +       | +      | +     | +    | +        | +    | +      | +      | +        | +   | +        | -   | -        |
| <i>MYO1D</i>        | +        | +     | +     | +       | +       | +      | +     | +    | +        | +    | +      | +      | +        | +   | +        | -   | -        |
| <i>MYO1D</i>        | +        | +     | +     | +       | +       | +      | +     | +    | +        | +    | +      | +      | +        | +   | +        | -   | -        |

+: not deleted; -:deleted



**Table S25:** Genomic positions of the MLPA probes included in the P122-C1 kit (MRC Holland, The Netherlands) as well as the custom-designed MLPA probes (marked in bold) used to narrow down the breakpoint regions of the atypical *NF1* deletions investigated in this study. The custom-designed MLPA probes were established in our previous study (Vogt et al. 2012) in order to distinguish type-2 deletions with breakpoints located in *SUZ12* and *SUZ12P* from deletions that do not harbour proximal and distal deletion breakpoints within these paralogs.

| <b>Probe designation</b>         | <b>Probe position on chromosome 17 (hg19)</b> |
|----------------------------------|-----------------------------------------------|
| <i>TRAF4</i> 9176-L9350          | 27,074,291-27,074,314                         |
| <i>TRAF4</i> 8620-L8632          | 27,075,052-27,075,075                         |
| <i>SSH2</i> 9635-L9920           | 27,963,580-27,963,603                         |
| <i>SSH2</i> 9634-L9919           | 28,022,495-28,022,518                         |
| <i>BLMH</i> 9627-L9912           | 28,599,612-28,599,635                         |
| <i>BLMH</i> 9626-L9911           | 28,618,478-28,618,501                         |
| <i>CPD</i> 9628-L9913            | 28,770,910-28,770,933                         |
| <i>CPD</i> 9629-L9914            | 28,789,420-28,789,443                         |
| <b>Atyp_9</b>                    | 28,880,465-28,880,552                         |
| <i>SUZ12p</i> 11798-L12590       | 29,058,391-29,058,414                         |
| <i>SUZ12p</i> 11800-L12591       | 29,058,839-29,058,862                         |
| <b><i>SUZ12P</i> Int. 3</b>      | 29,068,410-29,068,495                         |
| <i>SUZ12p</i> 11801-L12592       | 29,085,145-29,085,168                         |
| <b><i>SUZ12P</i> Int. 5</b>      | 29,091,509-29,091,598                         |
| <b><i>SUZ12P</i> Int. 6</b>      | 29,094,856-29,094,921                         |
| <b><i>SUZ12P</i> Int. 8</b>      | 29,098,304-29,098,365                         |
| <b><i>SUZ12P</i> Int. 9</b>      | 29,107,598-29,107,655                         |
| <b><i>CRLF3</i></b>              | 29,111,573-29,111,654                         |
| <i>CRLF3</i> 3780-L3289          | 29,124,380-29,124,403                         |
| <i>ATAD5</i> 3781-L3290          | 29,162,044-29,162,067                         |
| <i>CENTA2</i> 3782-L3291         | 29,253,873-29,253,896                         |
| <i>RNF135</i> 3783-L3292         | 29,311,688-29,311,711                         |
| <i>NF1</i> Ex. 1 2491-L1922      | 29,421,598-29,421,621                         |
| <i>NF1</i> Ex. 12B 2507-L1938    | 29,552,202-29,552,225                         |
| <i>NF1</i> Ex. 23-2 2512-L1943   | 29,576,023-29,576,046                         |
| <i>NF1</i> Ex. 40 2525-L1956     | 29,676,152-29,676,175                         |
| <i>NF1</i> Ex. 48 5220-L3309     | 29,687,576-29,687,599                         |
| <b>Atyp_8</b>                    | 29,860,542-29,860,599                         |
| <b>Atyp_7</b>                    | 29,888,256-29,888,317                         |
| <b>Atyp_6</b>                    | 29,929,659-29,929,724                         |
| <b>Atyp_5</b>                    | 29,982,488-29,982,557                         |
| <b>Atyp_3</b>                    | 30,078,526-30,078,603                         |
| <b>Atyp_2</b>                    | 30,129,572-30,129,653                         |
| <b>Atyp_1</b>                    | 30,184,072-30,184,157                         |
| <i>UTP6</i> 3785-L3294           | 30,202,348-30,202,371                         |
| <b>Atyp_10</b>                   | 30,250,614-30,250,699                         |
| <b><i>SUZ12</i> before Ex. 1</b> | 30,262,903-30,262,984                         |
| <b><i>SUZ12</i> Int. 4</b>       | 30,276,270-30,276,335                         |
| <b><i>SUZ12</i> Int. 4_3</b>     | 30,289,757-30,289,826                         |
| <b><i>SUZ12</i> Int. 6</b>       | 30,301,500-30,301,575                         |
| <b><i>SUZ12</i> Int. 8</b>       | 30,304,954-30,305,031                         |
| <i>JJAZ1</i> Ex. 10 3786-L3295   | 30,315,410-30,315,433                         |
| <b><i>SUZ12</i> Ex. 13</b>       | 30,321,630-30,321,683                         |
| <b>Atyp_11</b>                   | 30,336,103-30,336,192                         |
| <i>LRRC37B</i> 3787-L3296        | 30,348,569-30,348,592                         |
| <i>ZNF207</i> 9637-L9949         | 30,693,753-30,693,776                         |
| <i>PSMD11</i> 9632-L9917         | 30,773,979-30,774,002                         |
| <i>PSMD11</i> 9633-L9918         | 30,796,071-30,796,094                         |
| <i>MYO1D</i> 9631-L9916          | 31,094,710-31,094,733                         |
| <i>MYO1D</i> 9630-L9915          | 31,107,652-31,107,675                         |

**Table S26:** Results of the MLPA investigation of the 17 atypical *NF1* deletions by means of the MLPA probes included in the P122-C1 kit (MRC Holland, The Netherlands) as well as the custom-designed MLPA probes (marked in bold) used to narrow down the deletion breakpoint regions. The genomic positions of the respective probes and their complete designation are given in Table S25.

| MLPA-probe            | Patients |       |       |         |         |        |       |      |          |      |        |        |          |     |          |     |          |
|-----------------------|----------|-------|-------|---------|---------|--------|-------|------|----------|------|--------|--------|----------|-----|----------|-----|----------|
|                       | D06.1047 | 70969 | DA-77 | ASB4-55 | 08D2261 | 100206 | 61541 | 1106 | D1008345 | 2535 | R84329 | R48018 | AK-47005 | 659 | D0801587 | 619 | D05.2678 |
| <i>TRAF4</i>          | +        | +     | +     | +       | +       | +      | +     | +    | +        | +    | +      | +      | +        | +   | +        | +   | +        |
| <i>TRAF4</i>          | +        | +     | +     | +       | +       | +      | +     | +    | +        | +    | +      | +      | +        | +   | +        | +   | +        |
| <i>SSH2</i>           | +        | +     | +     | +       | +       | +      | +     | +    | +        | +    | +      | +      | +        | +   | -        | +   | +        |
| <i>SSH2</i>           | +        | +     | +     | +       | +       | +      | +     | +    | +        | +    | +      | +      | +        | +   | -        | +   | +        |
| <i>BLMH</i>           | +        | +     | +     | +       | +       | +      | +     | +    | +        | +    | +      | +      | +        | +   | -        | +   | -        |
| <i>BLMH</i>           | +        | +     | +     | +       | +       | +      | +     | +    | +        | +    | +      | +      | +        | +   | -        | +   | -        |
| <i>CPD</i>            | +        | +     | +     | +       | +       | +      | +     | +    | +        | +    | +      | +      | +        | +   | -        | +   | -        |
| <i>CPD</i>            | +        | +     | +     | +       | +       | +      | +     | +    | +        | +    | +      | +      | +        | +   | -        | +   | -        |
| <b>Atyp_9</b>         | +        | +     | +     | +       | +       | +      | +     | +    | +        | +    | +      | +      | +        | +   | -        | +   | -        |
| <i>SUZ12P</i>         | +        | +     | +     | +       | +       | +      | +     | -    | +        | +    | +      | +      | +        | +   | -        | -   | -        |
| <i>SUZ12P</i>         | +        | +     | +     | +       | +       | +      | +     | -    | +        | +    | +      | +      | +        | +   | -        | -   | -        |
| <b>SUZ12P Int. 3</b>  | +        | +     | +     | +       | +       | -      | +     | -    | +        | +    | +      | +      | +        | -   | -        | -   | -        |
| <i>SUZ12P</i>         | +        | +     | +     | +       | +       | -      | -     | -    | +        | +    | -      | -      | -        | -   | -        | -   | -        |
| <b>SUZ12P Int. 5</b>  | +        | +     | +     | +       | +       | -      | -     | -    | +        | +    | -      | -      | -        | -   | -        | -   | -        |
| <b>SUZ12P Int. 6</b>  | +        | -     | +     | +       | +       | -      | -     | -    | -        | +    | -      | -      | -        | -   | -        | -   | -        |
| <b>SUZ12P Int. 8</b>  | +        | -     | +     | +       | +       | -      | -     | -    | -        | +    | -      | -      | -        | -   | -        | -   | -        |
| <b>SUZ12P Int. 9</b>  | +        | -     | -     | -       | -       | -      | -     | -    | -        | -    | -      | -      | -        | -   | -        | -   | -        |
| <i>CRLF3</i>          | +        | -     | -     | -       | -       | -      | -     | -    | -        | -    | -      | -      | -        | -   | -        | -   | -        |
| <i>CRLF3</i>          | +        | -     | -     | -       | -       | -      | -     | -    | -        | -    | -      | -      | -        | -   | -        | -   | -        |
| <i>ATAD5</i>          | +        | -     | -     | -       | -       | -      | -     | -    | -        | -    | -      | -      | -        | -   | -        | -   | -        |
| <i>CENTA2</i>         | +        | -     | -     | -       | -       | -      | -     | -    | -        | -    | -      | -      | -        | -   | -        | -   | -        |
| <i>RNF135</i>         | -        | -     | -     | -       | -       | -      | -     | -    | -        | -    | -      | -      | -        | -   | -        | -   | -        |
| <i>NF1</i> Ex. 1      | -        | -     | -     | -       | -       | -      | -     | -    | -        | -    | -      | -      | -        | -   | -        | -   | -        |
| <i>NF1</i> Ex. 12B    | -        | -     | -     | -       | -       | -      | -     | -    | -        | -    | -      | -      | -        | -   | -        | -   | -        |
| <i>NF1</i> Ex. 23     | -        | -     | -     | -       | -       | -      | -     | -    | -        | -    | -      | -      | -        | -   | -        | -   | -        |
| <i>NF1</i> Ex. 40     | -        | -     | -     | -       | -       | -      | -     | -    | -        | -    | -      | -      | -        | -   | -        | -   | -        |
| <i>NF1</i> Ex. 48     | -        | -     | -     | -       | -       | -      | -     | -    | -        | -    | -      | -      | -        | -   | -        | -   | -        |
| <b>Atyp_8</b>         | +        | -     | -     | -       | -       | -      | -     | +    | -        | -    | -      | -      | -        | -   | +        | -   | -        |
| <b>Atyp_7</b>         | +        | -     | -     | -       | -       | -      | -     | +    | -        | -    | -      | -      | -        | -   | +        | -   | -        |
| <b>Atyp_6</b>         | +        | -     | -     | -       | -       | -      | -     | +    | -        | -    | -      | -      | -        | -   | +        | -   | -        |
| <b>Atyp_5</b>         | +        | -     | -     | +       | -       | -      | -     | +    | -        | -    | -      | -      | -        | -   | +        | -   | -        |
| <b>Atyp_3</b>         | +        | -     | -     | +       | -       | +      | -     | +    | -        | -    | -      | -      | -        | -   | +        | -   | -        |
| <b>Atyp_2</b>         | +        | -     | +     | +       | +       | +      | -     | +    | -        | -    | -      | -      | -        | -   | +        | -   | -        |
| <b>Atyp_1</b>         | +        | +     | +     | +       | +       | +      | -     | +    | -        | -    | -      | -      | -        | -   | +        | -   | -        |
| <i>UTP6</i>           | +        | +     | +     | +       | +       | +      | +     | +    | -        | -    | -      | -      | -        | -   | +        | -   | -        |
| <b>Atyp_10</b>        | +        | +     | +     | +       | +       | +      | +     | +    | +        | -    | +      | +      | +        | -   | +        | -   | -        |
| <i>SUZ12 b Ex. 1</i>  | +        | +     | +     | +       | +       | +      | +     | +    | +        | +    | +      | +      | +        | -   | +        | -   | -        |
| <i>SUZ12 Int. 4</i>   | +        | +     | +     | +       | +       | +      | +     | +    | +        | +    | +      | +      | +        | -   | +        | -   | -        |
| <b>SUZ12 Int. 4_3</b> | +        | +     | +     | +       | +       | +      | +     | +    | +        | +    | +      | +      | +        | -   | +        | -   | -        |
| <i>SUZ12 Int. 6</i>   | +        | +     | +     | +       | +       | +      | +     | +    | +        | +    | +      | +      | +        | -   | +        | -   | -        |
| <i>SUZ12 Int. 8</i>   | +        | +     | +     | +       | +       | +      | +     | +    | +        | +    | +      | +      | +        | -   | +        | -   | -        |
| <i>JJAZ1</i> Ex. 10   | +        | +     | +     | +       | +       | +      | +     | +    | +        | +    | +      | +      | +        | -   | +        | -   | -        |
| <i>SUZ12</i> Ex. 13   | +        | +     | +     | +       | +       | +      | +     | +    | +        | +    | +      | +      | +        | -   | +        | -   | -        |
| <b>Atyp_11</b>        | +        | +     | +     | +       | +       | +      | +     | +    | +        | +    | +      | +      | +        | -   | +        | -   | -        |
| <i>LRRC37B</i>        | +        | +     | +     | +       | +       | +      | +     | +    | +        | +    | +      | +      | +        | +   | +        | -   | -        |
| <i>ZNF207</i>         | +        | +     | +     | +       | +       | +      | +     | +    | +        | +    | +      | +      | +        | +   | +        | -   | -        |
| <i>PSMD11</i>         | +        | +     | +     | +       | +       | +      | +     | +    | +        | +    | +      | +      | +        | +   | +        | -   | -        |
| <i>PSMD11</i>         | +        | +     | +     | +       | +       | +      | +     | +    | +        | +    | +      | +      | +        | +   | +        | -   | -        |
| <i>MYO1D</i>          | +        | +     | +     | +       | +       | +      | +     | +    | +        | +    | +      | +      | +        | +   | +        | -   | -        |
| <i>MYO1D</i>          | +        | +     | +     | +       | +       | +      | +     | +    | +        | +    | +      | +      | +        | +   | +        | -   | -        |

+: not deleted; -: deleted

**Table S27:** List of PCR primers and their sequences used for the breakpoint-spanning PCRs.

| Patient  | Forward primer |                             |                           | Reverse primer |                             |                           |
|----------|----------------|-----------------------------|---------------------------|----------------|-----------------------------|---------------------------|
|          | Designation    | Sequence 5'→3'              | Position (hg19)           | Designation    | Sequence 5'→3'              | Position (hg19)           |
| D1008345 | Jun4for        | TTTTTGTAAAGCCAAGATATTCTTCTA | 29,091,530-<br>29,091,555 | D100_1rev      | GGAGGCAGTCAAATCTGAGG        | 30,218,675-<br>30,218,694 |
| 659      | BK35for        | GGTACTGTGGCCCTGGAGT         | 28,948,463-<br>28,948,481 | BK35rev        | TAACCCCTCTCTGTGTCCA         | 30,345,583-<br>30,345,602 |
| 1106     | 1106_23for     | TGCAAAAATGGTAGTGATTCAAA     | 28,999,815-<br>28,999,837 | 1106_23rev     | CTGGGGCAGAAGGAGTCAG         | 29,766,012-<br>29,766,030 |
| 100206   | Ala1_2for      | GCCATTGATTGAATACCTTTTGA     | 29,061,720-<br>29,061,742 | Ala1_2rev      | CTAGCCCCATCACGTCAGTC        | 30,020,861-<br>30,020,880 |
| 61541    | Ala6_1for      | CTGCTCTTTGGTCACTTCAGAAC     | 29,079,305-<br>29,079,327 | Ala6_1rev      | CTCTTTTTCCCAAGCAGTTAAT      | 30,188,006-<br>30,188,028 |
| 70969    | Ala7_3for      | TGGTATTCAAATAACACCCCTAA     | 29,091,503-<br>29,091,527 | Ala7_1rev      | CATGAAAAGGTGGACTCTCAAAC     | 30,175,954-<br>30,175,976 |
| 619      | CK_121for      | GGGACTATAGGCTTGCACCA        | 28,945,738-<br>28,945,757 | CK_122rev      | CCCAGTGAACCAAATCAAA         | 31,954,773-<br>31,954,792 |
| D0801587 | D080_2for      | ATATTTGGGCCCATGTTACGAT      | 27,721,045-<br>27,721,066 | D080_2rev      | TACAAAGGCAGCCAGCAAGTT       | 29,730,310-<br>29,730,330 |
| D05.2678 | 49_D05_2for    | TCCAACGAAAAGATTTTCACC       | 28,140,018-<br>28,140,038 | 49_D05_1rev    | GAGAAAGAAGGAGCAGGGATT       | 34,114,857-<br>34,114,877 |
| D06.1047 | 57_1for        | TGATGACCACTTGGTTTTGC        | 29,261,541-<br>29,261,560 | 57_1rev        | TGTGACCTGCTAGTTCTTGAA       | 29,784,378-<br>29,784,399 |
| R84329   | R84_1for       | TGTTGTCTGCATGGGTAGAGA       | 29,067,202-<br>29,067,222 | R84_1rev       | CTGTCCACTTGGAAAGAGGTG       | 30,224,933-<br>30,224,953 |
| 2535     | Ala7_2for      | TTTGTTTTGTGAGTGGTTTATTTACA  | 29,093,307-<br>29,093,332 | 2535_1rev      | ACGTGTCTGAGCGGAAGAAG        | 30,250,936-<br>30,250,955 |
| 08D2261  | 49_1for        | GATGGCAAGAAACACAGACG        | 29,098,312-<br>29,098,331 | 49_1rev        | TGCTTTTGTGCAATGTCTGG        | 30,080,001-<br>30,080,020 |
| R48018   | R48_2for       | TCTATTTTGTACATTTAGCTGCATTTT | 29,081,049-<br>29,081,075 | R48_3rev       | GGGGAAAAGTATTTTCAAACCTCA    | 30,244,915-<br>30,244,937 |
| DA-77    | GSP1_for       | TTTTAGGCAGCATGGGGTATGTTCTG  | 29,099,021-<br>29,099,046 | GSP1_rev       | TCTGATCATCCATACGTGACACACTGA | 30,103,175-<br>30,103,201 |
| ASB4-55  | as117for       | CCCAGAATTCCATAGTTACCAGATTCA | 29,102,524-<br>29,102,550 | as146Brev      | TGATCTACTGACAGGTTACCCTTGGA  | 29,971,139-<br>29,971,164 |
| Ak-47055 | AK_4for        | TTTCTATTTTGTACATTTAGCTGCATT | 29,081,047-<br>29,081,073 | 2535_1rev      | ACGTGTCTGAGCGGAAGAAG        | 30,250,936-<br>30,250,955 |

**Table S28:** List of restriction enzymes used for the inverse PCR experiments performed in order to identify the deletion breakpoints in patients DA-77 and ASB4-55.

| <b>Patient</b> | <b>Breakpoint region analysed</b> | <b>Restriction enzyme</b>   | <b>Genomic position (hg19)</b> |
|----------------|-----------------------------------|-----------------------------|--------------------------------|
| DA-77          | telomeric                         | <i>Eco53KI</i> <sup>a</sup> | 30,103,521                     |
|                |                                   | <i>PvuII</i>                | 30,103,539                     |
|                |                                   | <i>DraI</i>                 | 30,103,996                     |
|                |                                   | <i>AvaII</i>                | 30,105,425                     |
|                |                                   | <i>AvrII</i>                | 30,105,830                     |
| ASB4-55        | centromeric                       | <i>PciI</i> <sup>a</sup>    | 29,100,547                     |
|                |                                   | <i>HincII</i> <sup>a</sup>  | 29,101,984                     |
| ASB4-55        | telomeric                         | <i>PciI</i>                 | 29,972,011                     |
|                |                                   | <i>HincII</i>               | 29,972,017                     |
|                |                                   | <i>Eco53KI</i>              | 29,972,654                     |
|                |                                   | <i>SacI</i>                 | 29,972,656                     |
|                |                                   | <i>BaeGI</i>                | 29,973,013                     |

**a:** Restriction enzyme used successfully to characterize the deletion breakpoint.

**Table S29:** Primers used for the inverse PCR assays performed to identify the deletion breakpoints of patients DA-77 and ASB4-55.

| <b>Patient analysed</b> | <b>Primer</b> | <b>Sequence (5'→3')</b>     | <b>Genomic position (hg19)</b> |
|-------------------------|---------------|-----------------------------|--------------------------------|
| DA-77                   | ADinv_3rev    | CATATCTTGCCTCTTGCTGCTA      | 30,103,219-30,103,240          |
|                         | ADinv_3for    | CACTAGGTTCCAGTCCCTTGTT      | 30,103,433-30,103,454          |
| ASB4-55                 | as_inv2rev    | CCACTACTAAACACCATTCTTCAA    | 29,102,350-29,102,373          |
|                         | as_inv1for    | GACACATATGTACACACACCTTAAAA  | 29,102,413-29,102,438          |
| ASB4-55                 | as47rev       | TAATTGTCATTTCAACAATTGATCTAC | 29,971,157-29,971,183          |
|                         | as48for       | AATGTTGTCTGTAGGCATTCAGGAG   | 29,971,227-29,971,251          |
| ASB4-55                 | as54for       | TGTAGGCATTCAGGAGATAGCACA    | 29,971,236-29,971,259          |
|                         | As54rev       | TGATCTACTGACAGGTTACCCTTGGA  | 29,971,139-29,971,164          |
| ASB4-55                 | as63rev       | GAGAAGCAAAAAGAAAACCTCAATCA  | 29,971,813-29,971,836          |
|                         | as64for       | AACCAAAAATGAACAAATTAACAGAAT | 29,971,898-29,971,924          |

**Table S30:** Forward and reverse primers used for the semi-specific PCRs performed to identify unknown inserted sequences at the deletion breakpoints of patient DA-77. The region-specific forward and reverse primers are located within non-deleted regions close to the deletion breakpoints as determined by array CGH.

| <b>Primer designation</b> | <b>Breakpoint analysed</b> | <b>Sequence (5'→3')</b>     | <b>Genomic position (hg19)</b> |
|---------------------------|----------------------------|-----------------------------|--------------------------------|
| as79for                   | centromeric                | GGCAAGAAACACAGACGTACAATAAT  | 29,098,315-29,098,340          |
| AD67for                   | centromeric                | TGCAATTTCTTTTTGGAAACG       | 29,098,344-29,098,364          |
| AD38for                   | centromeric                | GGCTGCGTGCTGGTAGTTA         | 29,098,474-29,098,492          |
| as96for                   | centromeric                | TCAGAAATTTTATTGTGGATCGAA    | 29,098,882-29,098,905          |
| AD70for                   | centromeric                | GATTTAAATGGAAAACAATAGAACCA  | 29,098,906-29,098,931          |
| AD71for                   | centromeric                | GAAAATAGTGGTCATGTCTGTGG     | 29,098,943-29,098,965          |
| AD72for                   | centromeric                | AATTAGAATGAGGCGCATTGG       | 29,098,973-29,098,993          |
| AD88for                   | centromeric                | CAGCATGGGGTATGTTCTG         | 29,099,028-29,099,046          |
| AD89for                   | centromeric                | TTTTTAATCACTGTACCTGACACATA  | 29,099,053-29,099,078          |
| AD90for                   | centromeric                | AAGTGCCAAGAAGAACTGG         | 29,099,129-29,099,148          |
| AD91for                   | centromeric                | CTGGTGACAGCGAGACTCTG        | 29,099,439-29,099,458          |
| AD92for                   | centromeric                | TTCAAAACTATAGGAAAGTTGAAAGAA | 29,099,481-29,099,507          |
| AD93for                   | centromeric                | GGGATTCTAATGAGTGATGTGTTC    | 29,099,979-29,100,001          |
| AD68rev                   | telomeric                  | GTTGGGGGAGGATTAGGGTA        | 30,103,336-30,103,355          |
| AD69rev                   | telomeric                  | CAGGACTCCTCTGGCTGTTT        | 30,103,314-30,103,333          |
| AD23rev                   | telomeric                  | TTCAAGCTTCCCAGCAAAGT        | 30,103,153-30,103,172          |

Primer egalAAL (5'-TGAATTCGATCAAAAAAAAAAAAAAAAAA-3') was used as the non-specific primer for each PCR. The same set of experiments was also performed with primer egalTTL (5'-TGAATTCGATCTTTTTTTTTTTTTTTT-3') as the non-specific primer.

**Table S31:** Forward and reverse primers used for the semi-specific PCRs performed to identify unknown inserted sequences at the deletion breakpoints of patient ASB4-55. The region-specific forward and reverse primers are located within non-deleted regions close to the deletion breakpoints as determined by array CGH.

| <b>Primer designation</b> | <b>Breakpoint analysed</b> | <b>Sequence (5'→3')</b>   | <b>Genomic position (hg19)</b> |
|---------------------------|----------------------------|---------------------------|--------------------------------|
| as101for                  | centromeric                | GAAGAGAAGCCAGTTGCTTGA     | 29,102,303-29,102,323          |
| AD32for                   | centromeric                | CTGAGTATGGTTGAAGAATGGTG   | 29,102,340-29,102,362          |
| as115for                  | centromeric                | TCCCTAAGACAAGCATTGTAACAC  | 29,102,645-29,102,668          |
| as16rev                   | telomeric                  | TGCTGGTAGAGAGTGAAGAATGA   | 29,971,391-29,971,413          |
| as37rev                   | telomeric                  | AAAAACCATCATAATAAAATGCAAA | 29,971,324-29,971,348          |
| as116rev                  | telomeric                  | TCTGGATTATTGGGCAGGAC      | 29,971,263-29,971,282          |

Primer egalAAL (5'-TGAATTCGATCAAAAAAAAAAAAAAAAAA-3') was used as the non-specific primer for each PCR.

**Table S32:** List of all restriction enzymes used for the GenomeWalker™ analysis.

| <b>Patient</b> | <b>Breakpoint region</b> | <b>Restriction enzyme</b>   | <b>Position (hg19)</b> |
|----------------|--------------------------|-----------------------------|------------------------|
| DA-77          | centromeric              | <i>PvuII</i> <sup>a</sup>   | 29,092,597             |
|                |                          | <i>EcoRV</i>                | 29,097,395             |
|                |                          | <i>NlaIV</i>                | 29,098,714             |
|                |                          | <i>Eco53KI</i>              | 29,098,791             |
|                |                          | <i>SwaI</i> <sup>a</sup>    | 29,098,910             |
|                |                          | <i>MslI</i> <sup>a</sup>    | 29,098,959             |
| DA-77          | telomeric                | <i>NlaIV</i>                | 30,103,440             |
|                |                          | <i>Eco53KI</i> <sup>a</sup> | 30,101,577             |
|                |                          | <i>PvuII</i>                | 30,103,539             |
|                |                          | <i>DraI</i>                 | 30,103,996             |
|                |                          | <i>SwaI</i>                 | 30,103,996             |
|                |                          | <i>StuI</i>                 | 30,105,979             |
|                |                          | <i>EcoRV</i>                | 30,106,421             |
| ASB4-55        | centromeric              | <i>BmgBI</i>                | 29,089,196             |
|                |                          | <i>NaeI</i>                 | 29,092,295             |
|                |                          | <i>BsaBI</i>                | 29,095,322             |
|                |                          | <i>EcoRV</i>                | 29,097,395             |
|                |                          | <i>Eco53KI</i>              | 29,098,791             |
|                |                          | <i>SwaI</i>                 | 29,098,910             |
|                |                          | <i>HpaI</i>                 | 29,099,560             |
|                |                          | <i>StuI</i>                 | 29,099,895             |
|                |                          | <i>PvuII</i>                | 29,102,267             |
|                |                          | <i>MslI</i>                 | 29,102,507             |
|                |                          | <i>NlaIV</i>                | 29,102,520             |
|                |                          | <i>BstZ17I</i>              | 29,102,581             |
|                |                          | ASB4-55                     | telomeric              |
| <i>BsaBI</i>   | 29,972,145               |                             |                        |
| <i>Eco53KI</i> | 29,972,654               |                             |                        |
| <i>StuI</i>    | 29,973,908               |                             |                        |
| <i>HpaI</i>    | 29,977,639               |                             |                        |
| <i>BmgBI</i>   | 29,981,530               |                             |                        |
| <i>BstZ17I</i> | 29,983,906               |                             |                        |
| <i>EcoRV</i>   | 29,995,481               |                             |                        |
| <i>NaeI</i>    | 30,003,122               |                             |                        |
| <i>SwaI</i>    | 30,012,166               |                             |                        |
| <i>FspI</i>    | 30,015,466               |                             |                        |

**a:** The indicated restriction enzyme was successfully used to characterize the deletion breakpoint and to identify the inserted SVA element.



**Table S33:** Gene-specific primers (GSPs) used to perform the GenomeWalker™ analysis. The given GSP was combined either with primer AP1 (5'-GTAATACGACTCACTATAGGGC-3') or primer AP2 (5'-ACTATAGGGCACGCGTGGT-3').

| <b>Patient analysed</b> | <b>Breakpoint region</b> | <b>Primer</b> | <b>Sequence (5'→3')</b>        | <b>Genomic position (hg19)</b> |
|-------------------------|--------------------------|---------------|--------------------------------|--------------------------------|
| DA-77                   | centromeric              | GSP1_for      | TTTtaggcagcatgggggatgttctg     | 29,099,021-<br>29,099,046      |
| DA-77                   | centromeric              | GSP2_for      | AAAAGTGCCAAGAAGAAACTGGGAGAA    | 29,099,127-<br>29,099,153      |
| DA-77                   | telomeric                | GSP1_rev      | TCTGATCATCCATACGTGACACACTGA    | 30,103,175-<br>30,103,201      |
| DA-77                   | telomeric                | GSP2_rev      | AGGCTTGTGTGTCTCTTATGCTTGCTC    | 30,103,108-<br>30,103,134      |
| ASB4-55                 | centromeric              | GSP3_for      | AGTGTTTCCCTAAGACAAGCATTGTAACAC | 29,102,639-<br>29,102,668      |
| ASB4-55                 | centromeric              | GSP4_for      | ACCAGGTTTTGAGACCTCAGGCATATTA   | 29,103,038-<br>29,103,065      |
| ASB4-55                 | telomeric                | GSP3_rev      | TTGATCTACTGACAGGTTACCCTTGGA    | 29,971,138-<br>29,971,165      |
| ASB4-55                 | telomeric                | GSP4_rev      | CAATATTTTAGAACCTGTTCTTTTCACTTG | 29,971,063-<br>29,971,092      |

**A**

```

proximal 5' TCATAGCTCACTGCAGCCTTGAACCTCTTGGCTCAAGAGATCCTTCCACCTAGCCTCTGAGGTAGCTAGGACTACAGGCACATGACACCCACCACACCCA 3'
70969    5' TCATAGCTCACTGCAGCCTTGAACCTCTTGGCTCAAGAGATCCTTCCACCTGGCCAGGTTGACCAACCTGGCCAACATGGTCAAACCCCGTCTCTACTAA 3'
distal   5' CTGTAATATCAGCACTTTGGGAGGTCGAGGTGGGCAGATCATATGAGGTGAGGAGTTCGAGACCAACCTGGCCAACATGGTCAAACCCCGTCTCTACTAA 3'

```

**B**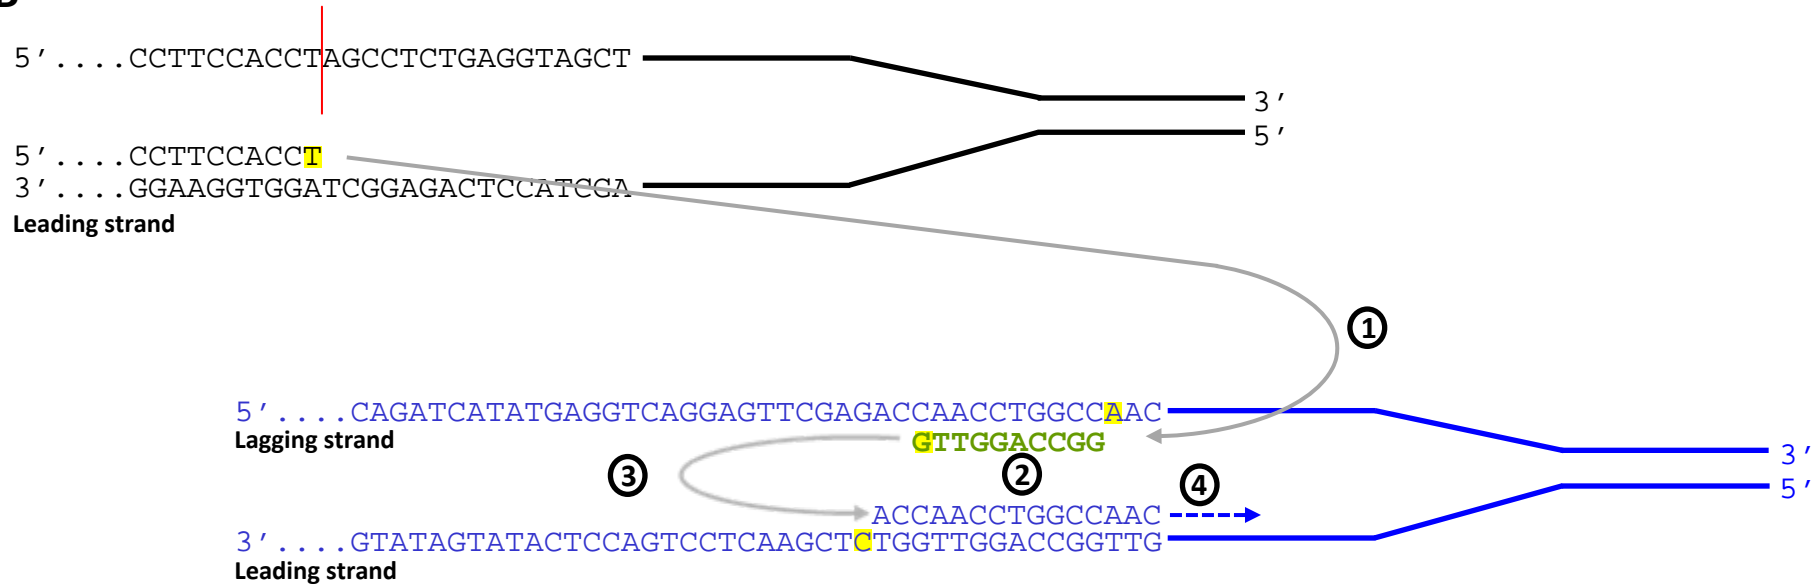

**Figure S1:** The insertion of 9-bp (green) at the deletion breakpoints of patient 70969 may have occurred in association with the occurrence of the large *NF1* deletion mediated by replication-associated template switching. **(A)** Alignment of the deletion breakpoint-flanking sequences of patient 70969 against the reference sequence of the human genome (hg19). Sequences located at the proximal (centromeric) deletion breakpoint are indicated in black, whilst sequences at the distal (telomeric) breakpoint are given in blue. The vertical red line highlights the position of the proximal deletion breakpoint. The 9-bp insertion (green) represents a duplication of 9-bp from the distal breakpoint region (underlined). **(B)** In the proximal breakpoint-flanking region, DNA synthesis at the leading strand is interrupted but appears to have resumed, after an interstrand template switch, at sequences located within the distal breakpoint-flanking region (blue) (**step 1**). Subsequently, the 9-bp indicated in green are newly synthesized and included in the nascent DNA strand at the replication fork located in the distal breakpoint region (**step 2**). This is then followed by another template switch occurring onto the leading strand (**step 3**) upon which replication is continued (**step 4**). The nucleotides exhibiting microhomology at sites of template switching are marked in yellow.

**A**

|          |    |                                                                                                                           |    |
|----------|----|---------------------------------------------------------------------------------------------------------------------------|----|
| proximal | 5' | AGATTAAAGGAAATGAAGACATGACATGCAGTGCCTGATCTTTGACTGGATTCTGTAGTATTCTTTTCATCTTTCTGCATGTTTGAATTTTTTCAAATATAAATTGGGC             | 3' |
| 619      | 5' | AGATTAAAGGAAATGAAGACATGACATGCAGTGCCTGATCTTTGACTGGATTCTG <u>GTAGCAGAAT</u> GTGGTAGCAGGTGTGCTGAACTCTGGCTAGGTCTCCTCAACCCCTG  | 3' |
| distal   | 5' | GCTGCTGCTCCTGCCACTGATGAAAAGTGCTTTCCCAACAGGAAGA <u>AAT</u> GAATGAGCCTTGGGGCGGTGGTAGCAGGTGTGCTGAACTCTGGCTAGGTCTCCTCAACCCCTG | 3' |

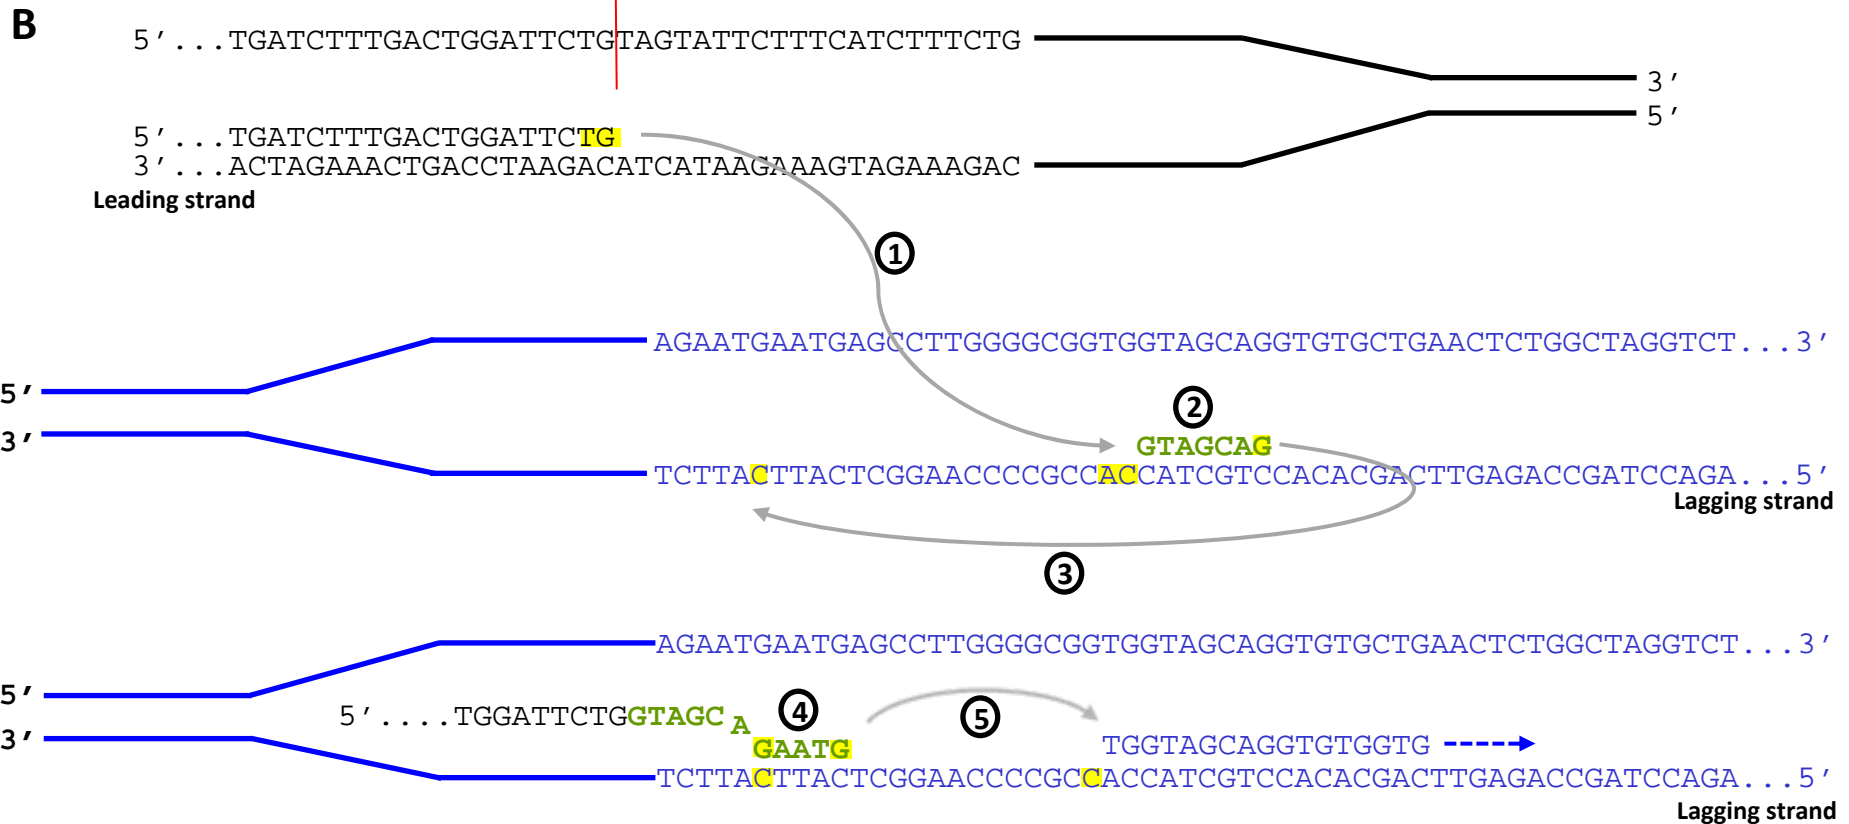

**Figure S2:** The insertion of 10-bp at the deletion breakpoint of patient 619 is likely to have occurred concomitantly with the large *NF1* deletion mediated by template switching during replication. **(A)** Alignment of the deletion junction sequences against the reference sequence of the human genome (hg19). Sequences at the proximal (centromeric) deletion breakpoint are indicated in black, whilst sequences at the distal (telomeric) breakpoint are given in blue. The vertical red line represents the proximal deletion breakpoint. The insertion of 10-bp (green) appears to represent a duplication of the underlined sequences. **(B)** Within the proximal breakpoint-flanking region, DNA synthesis at the leading strand is interrupted but continues after an interstrand template switch into a replication fork located within the distal breakpoint-flanking region (blue) (**step 1**). The 7-bp sequence indicated in green is newly synthesized and included within the nascent DNA strand (**step 2**). Subsequently, a further template switch occurs which involves sequences located in 3' direction, also within the lagging strand template, causing the insertion of the trinucleotide 'AAT' (**step 4**). Finally, another template switch occurs (**step 5**) and replication is continued within the distal breakpoint-flanking region. The nucleotides exhibiting microhomology at sites of template switching are marked in yellow.

**A**

proximal 5' TTGTCGCCCAGGCTGGAGTGTAGTGGTGCATCTTGGCTCACTGCAACCTCCATCCCCAGGTTCAAGAGATTGTCTCGCCGACGCTCCCTAGTAGCTGGGATTATATGC 3'

R84329 5' TTGTCGCCCAGGCTGGAGTGTAGTGGTGCATCTTGGCTCACTGCAACCTCTGTCCCTCTGTACCGCGCTCGGCCCTACACTTTGTTTAACTTTATTTAACTAATTA 3'

3' AACAGCGGGTCCGACCTCACATCACCACGCTAGAACCAGTGACGTTGGAGACAGGGGAGACATGGCGCGAGCCGGGGATGTGAAACAAAATTAGAAAATAAATTGATTAAT 5'

distal 5' TCCCAACCTCAAGTAATCCACCCGCCTCAGCCTCCCAAAGTGCTAGGATTACAGGCATGAGCTACCGCGCTCGGCCCTACACCTTGTTTTAACTTTATTTAACTAATTA 3'

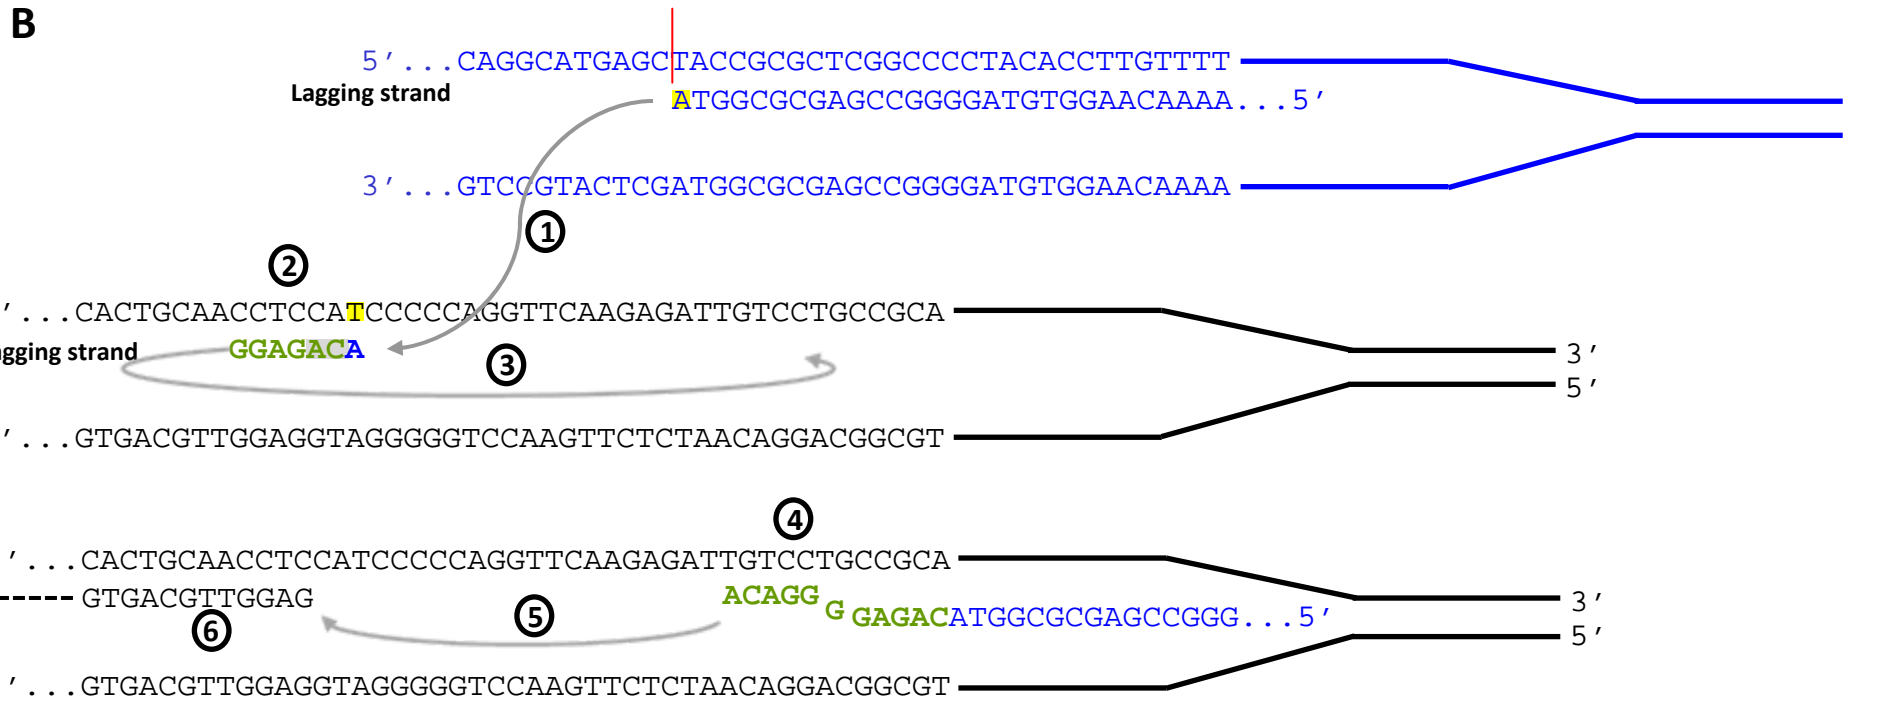

**Figure S3:** The insertion of 11-bp at the deletion breakpoint junction of patient R84329 is likely to have occurred concomitantly with the large *NF1* deletion mediated by replication-associated template switching. **(A)** Alignment of the deletion breakpoint-flanking sequences against the reference sequence of the human genome (hg19). Sequences at the proximal (centromeric) deletion breakpoint are indicated in black, whilst sequences at the distal (telomeric) breakpoint are given in blue. The vertical red line highlights the position of the distal deletion breakpoint. The insertion of 11-bp (green) appears to represent a duplication of pre-existing sequences (underlined). **(B)** In the distal breakpoint-flanking region, DNA synthesis at the lagging strand stops and an interstrand template switch occurs into a replication fork located within the proximal breakpoint-flanking region (black) (**step 1**). The hexanucleotide 'GGAGACA' (green) is included within the nascent DNA strand (**step 2**). Single nucleotide changes due to DNA polymerase errors are highlighted in grey. Subsequently, another template switch occurs (**step 3**) causing the insertion of the five additional nucleotides indicated in green (**step 4**). Finally, a further template switch occurs (**step 5**) followed by continued replication within the proximal breakpoint-flanking region (**step 6**). The nucleotide exhibiting microhomology at the site of template switching is marked in yellow.

**Patient 08D2261**

proximal GCCAAGATGCTGAAACCCGTCTCTACTAAAAATACAAAAATTAGCCGGGCATGGTGGCACGCGCCTGTAATCCCAGCTACTCGGGAGGCTGAGGCAGGAGAATCGCTTGAACCTGG  
deletion GCCAAGATGCTGAAACCCGTCTCTACTAAAAATACAAAAATTAGCCGGGCATGGTGGCAACCACACCAGGCCTATTTTGTGCATTTTAAACACAATTGTTAAAGTGGTAAATTTTAT  
distal CAACTCAAGCGATCTTCCCACCTTGGCCCTCCAAAGTGTGGGATTACAGGCATAAGCCACCACACCAGGCCTATTTTGTGCATTTTAAACACAATTGTTAAAGTGGTAAATTTTAT

**Patient 100206**

proximal TGAAATCAATAGGATGAAGGTTTTTTAAAAACAATGAAGTCTTAAATCATTAGATTTTAAAGTGGGGTCTGGAGGTGGAAGACAGCTTATTTCTGCTGTGTAACATTTAGTACTTA  
deletion TGAAATCAATAGGATGAAGGTTTTTTAAAAACAATGAAGTCTTAAATCGTTAGATTTAAGTACTCCAACCTGGGTACAGAGCAAGACTGTGTCTCTAAATAAAGAAGGCAAGAAA  
distal GTGGGAGGACTGCTTGAGCTGAGGGGTGAGGGTTCAGTGAGCTGTGATCATGCCACTGTACTCCAACCTGGGTACAGAGCAAGACTGTGTCTCTAAATAAAGAAGGCAAGAAA

**Patient D1008345**

proximal AGAAGTGGGCAGATTGCTTGAACCCAGGAGTTAAGCATCCTGGGCAACATGGCGAAACCTGTCTCTACAAAAACACGAAAATGAGCTAGGCATGATGGCCTGTGCCTGTAGTCC  
deletion AGAAGTGGGCAGATTGCTTGAACCCAGGAGTTAAGCATCCTGGGCAACATGGCGAAACAATGGTGGCAAGCAATTGCTTTGGGCTTCCTTGAACATGTGACTCCTAAAATTGAGC  
distal ATTGCTTTTGTAAATAATGACGCCGTGATTGGTAACCACACCTGGAATAGAAGGTCAGCAATGGTGGCAAGCAATTGCTTTGGGCTTCCTTGAACATGTGACTCCTAAAATTGAGC

**Patient D05.2678**

proximal CCGCCCGCCTTGGCCTCCCAAAATGCTGGGATTACAGGTGTTAGCCACCGTGCCTGGCCCTATTTTTTGTATTTTTTAGTAGAGACGGGGTTTTGCCATGTTGGCCAGGCTGGTC  
deletion CCGCCCGCCTTGGCCTCCCAAAATGCTGGGATTACAGGTGTTAGCCACCGTGCCTGGCCCTGTGGAGTCTGGGTAATAATGGAAC TAGTTCTCCTGGGACCCAGCCAGCTTGGTGGAA  
distal CTTGGTTAGGGCTGGGACCACTTTCTGGGGAGTCACTTCTGAAAGTCCCTGGGAGTGGCTGTGGAGTCTGGGTAATAATGGAAC TAGTTCTCCTGGGACCCAGCCAGCTTGGTGGAA

**Patient 70969**

proximal TGACAGGATCATAGCTCACTGCAGCCTTGAACCTCCTGGCTCAAGAGATCCTTCCACCTAGCCTCTGAGGTAGCTAGGACTACAGGCACATGACACCCACCACACCCAGCTAATTT  
deletion TGACAGGATCATAGCTCACTGCAGCCTTGAACCTCCTGGCTCAAGAGATCCTTCCACCTGGCCAGGTTGACCAACCTGGCCAACATGGTGAACCCCGTCTCTACTAAAAATACAA  
distal GCTCACTCCTGTAATATCAGCACTTTGGGAGGTCGAGGTGGGCAGATCATATGAGGTCAGGAGTTCGAGACCAACCTGGCCAACATGGTGAACCCCGTCTCTACTAAAAATACAA

**Patient 619**

Proximal TTTTATGATTAAGGAAATGAAGACATGACATGCAGTGCCTGATCTTTGACTGGATTCTGTAGTATCTTTTCATCTTCTGTCATGTTGAATTTTTTTCAAAAATATAAATTTGGGCA  
deletion TTTTATGATTAAGGAAATGAAGACATGACATGCAGTGCCTGATCTTTGACTGGATTCTGTAGCAGAAATGTGGTAGCAGGTGTGCTGAACTCTGGCTAGGCTCCTCAACCCCTGA  
distal TCCTGCTGCTGCTCCTGCCACTGATGAAAAGTGTCTTCCCAACAGGAAGAATGAATGAGCCTTGGGGCGGTGGTAGCAGGTGTGCTGAACTCTGGCTAGGCTCCTCAACCCCTGA

**Patient R84329**

proximal GTCTCACATTGTCGCCCAGGCTGGAGTGTAGTGGTGCATCTTGGCTCACTGCAACCTCCATCCCCAGGTTCAAGAGATTGCTCTGCCGAGCCTCCCTAGTAGCTGGGATTATA  
deletion GTCTCACATTGTCGCCCAGGCTGGAGTGTAGTGGTGCATCTTGGCTCACTGCAACCTCTGGTCCCTCTGTACCGCGCTCGGCCCTACACTTTGTTTTAATCTTTATTTAACTAA  
distal TCTCCAACCTCCAACCTCAAGTAATCCACCCGCTCAGCCTCCCAAGTGTAGGATTACAGGCATGAGCTACCGCGCTCGGCCCTACACTTTGTTTTAATCTTTATTTAACTAA

**Patient 61541**

proximal ATATTCCTTGTATAATTTTTTGGTTTTGTAGTAATCCTTTGTTTTCTTACAGTACTTCTGCAGAGTATCCATTTGTAATTAATAGACACACACATCATCCACCATTTCAGC  
deletion ATATTCCTTGTATAATTTTTTGGTTTTGTAGTAATCCTTTGTTTTCTTACAGTACTTACATGTGCCTTGGAGCTACTGTTTTCTAACAGTGCACCTCTAGGTGTACTAGCTAGAT  
distal AGCACTTGAAATGTGGCCAATGTGAATAAATTGAATAAATTTAAATTTGCTACATGTGCCTTGGAGCTACTGTTTTCTAACAGTGCACCTCTAGGTGTACTAGCTAGAT

Figure S4



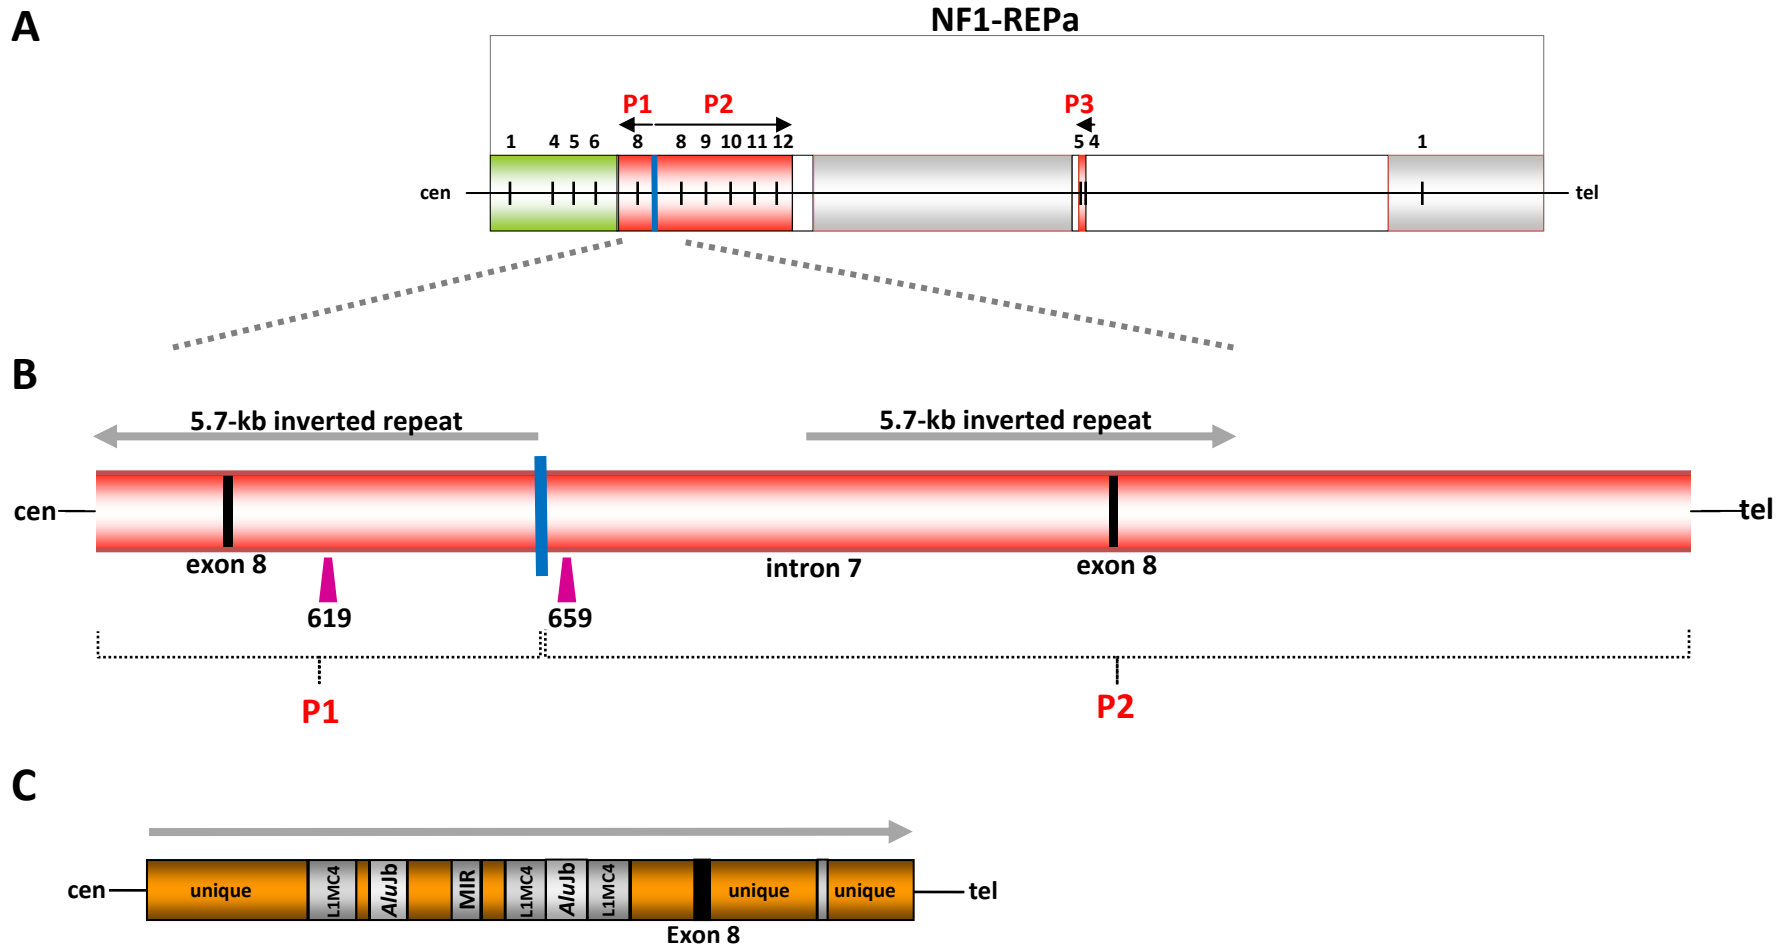

**Figure S5:** Location of the centromeric breakpoints of the atypical *NF1* deletions identified in patients 619 and 659 within NF1-REPa. **(A)** Sequence composition of NF1-REPa harbouring *LRRC37B-P* (red) and *SMURF2-P* (green), both pseudogenes. The numbers of the exons located within these pseudogenes are indicated. Additionally, NF1-REPa contains sequences that are highly homologous to chromosome 19p13.12 (marked in grey). The black arrows indicate the genomic orientation of the three *LRRC37B* pseudogene fragments (designated P1–P3). P1–P3 represent partial duplications of the *LRRC37B* gene located within NF1-REPa (not shown). **(B)** Inverted repeats of 5.7-kb were identified within *LRRC37B-P1* and *P2* (indicated by grey arrows). The centromeric deletion breakpoint in patient 619 (genomic position: 28,946,218; hg19) is located within the centromeric 5.7-kb inverted repeat. The centromeric deletion breakpoint in patient 659 (genomic position: 28,948,946; hg19) is located 48-bp telomeric to the 5.7-kb repeat. The relative positions of both breakpoints are indicated by lilac triangles. The 5.7-kb inverted repeats exhibit 99% sequence identity and are separated by 3,710-bp. We surmise that these repeats contributed to the occurrence of the large *NF1* deletions by forming a hairpin structure, thereby inducing a DNA double strand break. The sequence composition of the 5.7-kb repeat is shown in **(C)**.

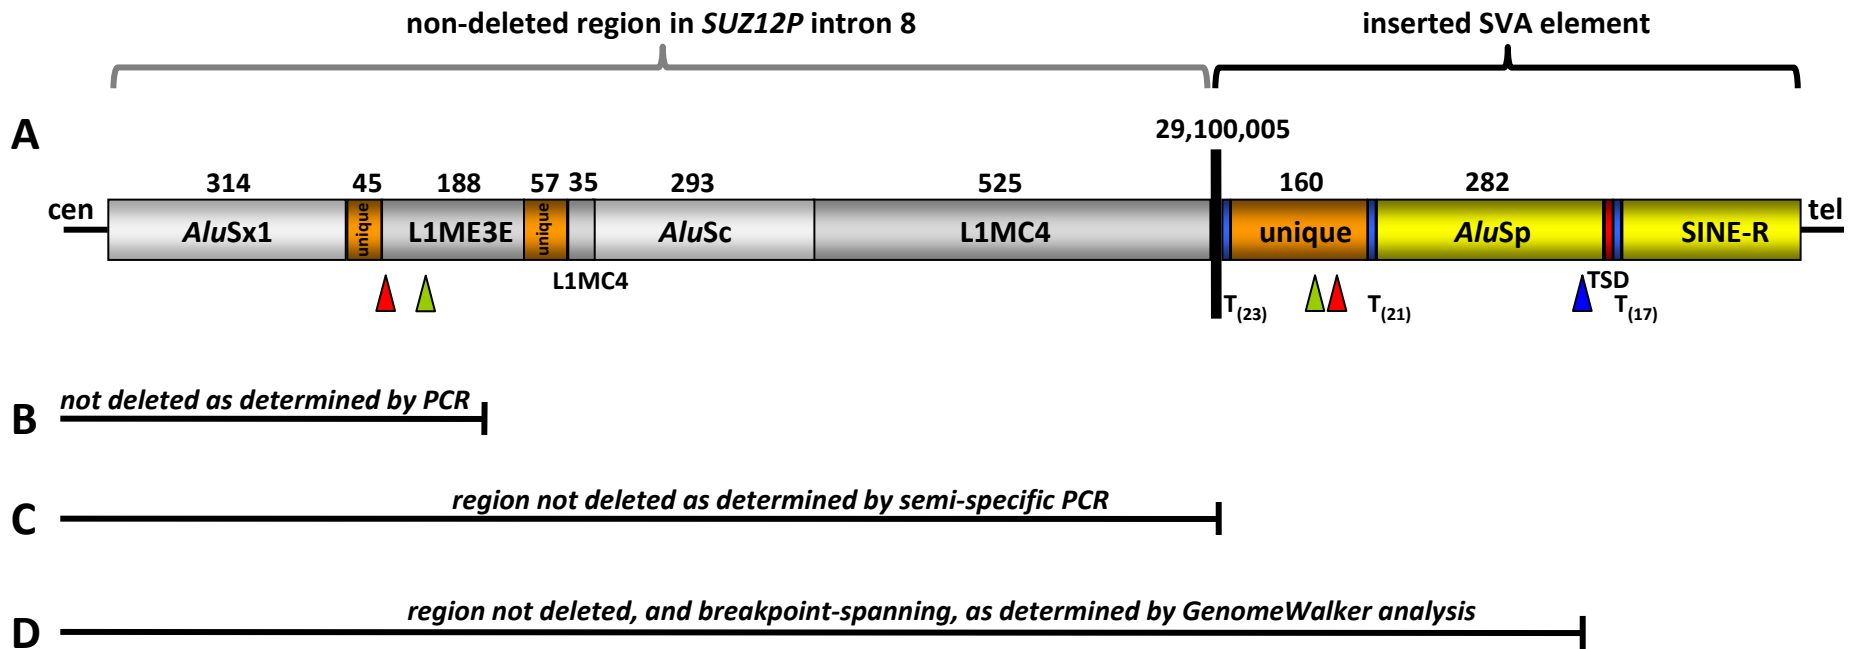

**Figure S6:** Identification of the centromeric deletion breakpoint in patient DA-77. **(A)** The breakpoint of the deletion is located within *SUZ12P* intron 8. The genomic region that is not deleted is marked by a grey bracket. The lengths of the repetitive and unique regions are indicated in base-pairs. **(B)** Relative extent of the region not deleted as determined by PCR using DNA isolated from somatic hybrid cells containing only the chromosome 17 with the deletion and not the normal chromosome 17 from the patient. **(C)** Semi-specific PCR indicated that the breakpoint was located within an L1MC4 element. At the breakpoint, a polyT<sub>(23)</sub> tract was observed that is not present at the corresponding position of the human genome reference sequence. **(D)** Identification of the SVA element insertion by means of GenomeWalker analysis using the restriction enzymes *PvuII* (blue triangle), *MslI* (green triangle) and *SwaI* (red triangle). Genomic position 29,100,005 demarcates the breakpoint of the deletion and the insertion site of the SVA element.



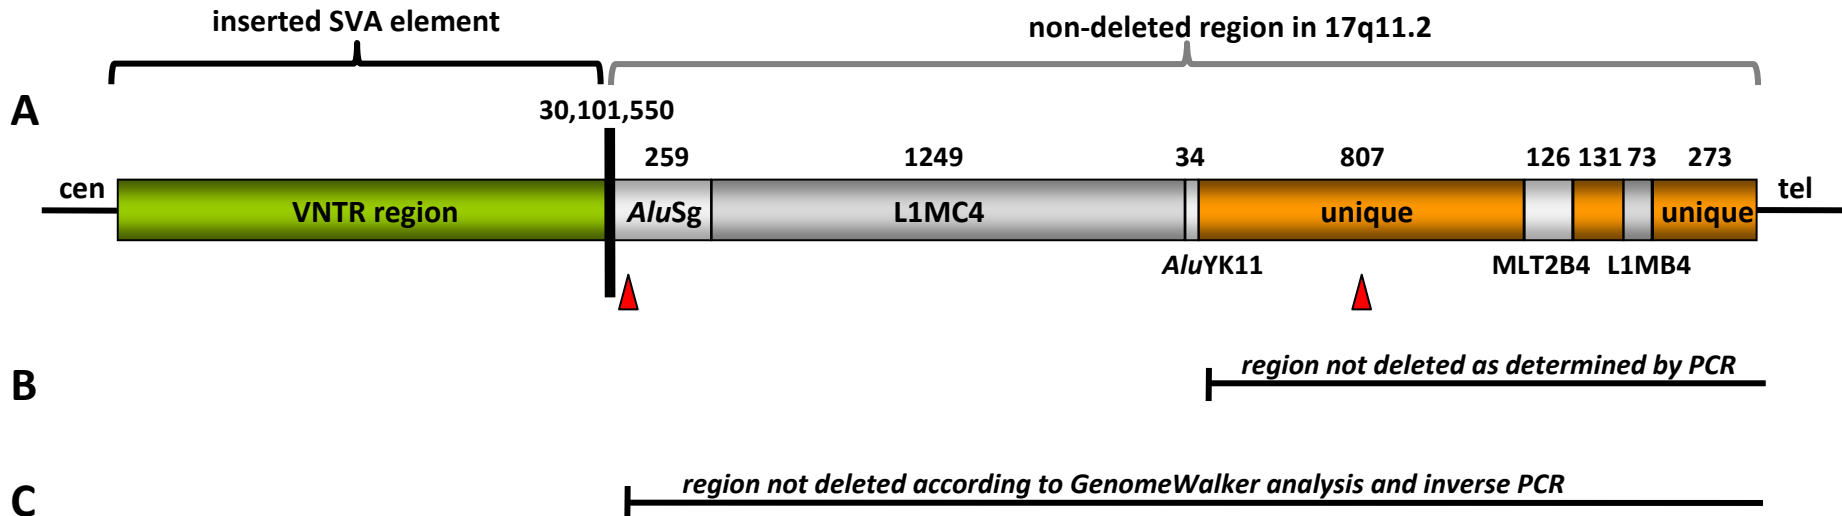

**Figure S7:** Analysis of the telomeric breakpoint region of the *NF1* deletion in patient DA-77. **(A)** The breakpoint is located within an intergenic region between the *RAB11FIP4* and *COPRS* genes at 17q11.2. The genomic region in 17q11.2 that is not deleted is marked by a grey bracket. The lengths of the repetitive and unique sequences located within the breakpoint-flanking regions are indicated in base-pairs. **(B)** Relative extent of the region not deleted, as determined by PCR using DNA isolated from somatic hybrid cells containing only the chromosome 17 with the deletion from the patient. **(C)** GenomeWalker analysis and inverse PCR using the restriction enzyme *Eco53KI* (restriction sites are marked by red triangles) indicated that the genomic region encompassing positions 30,101,577-30,103,521 is not deleted. Breakpoint-spanning PCR with primers depicted in Figure S8 revealed that the deletion breakpoint is located at position 30,101,550 within a truncated *AluSg* element of 259-bp. The corresponding full-length *AluSg* element in the reference sequence of the human genome spans 304-bp.

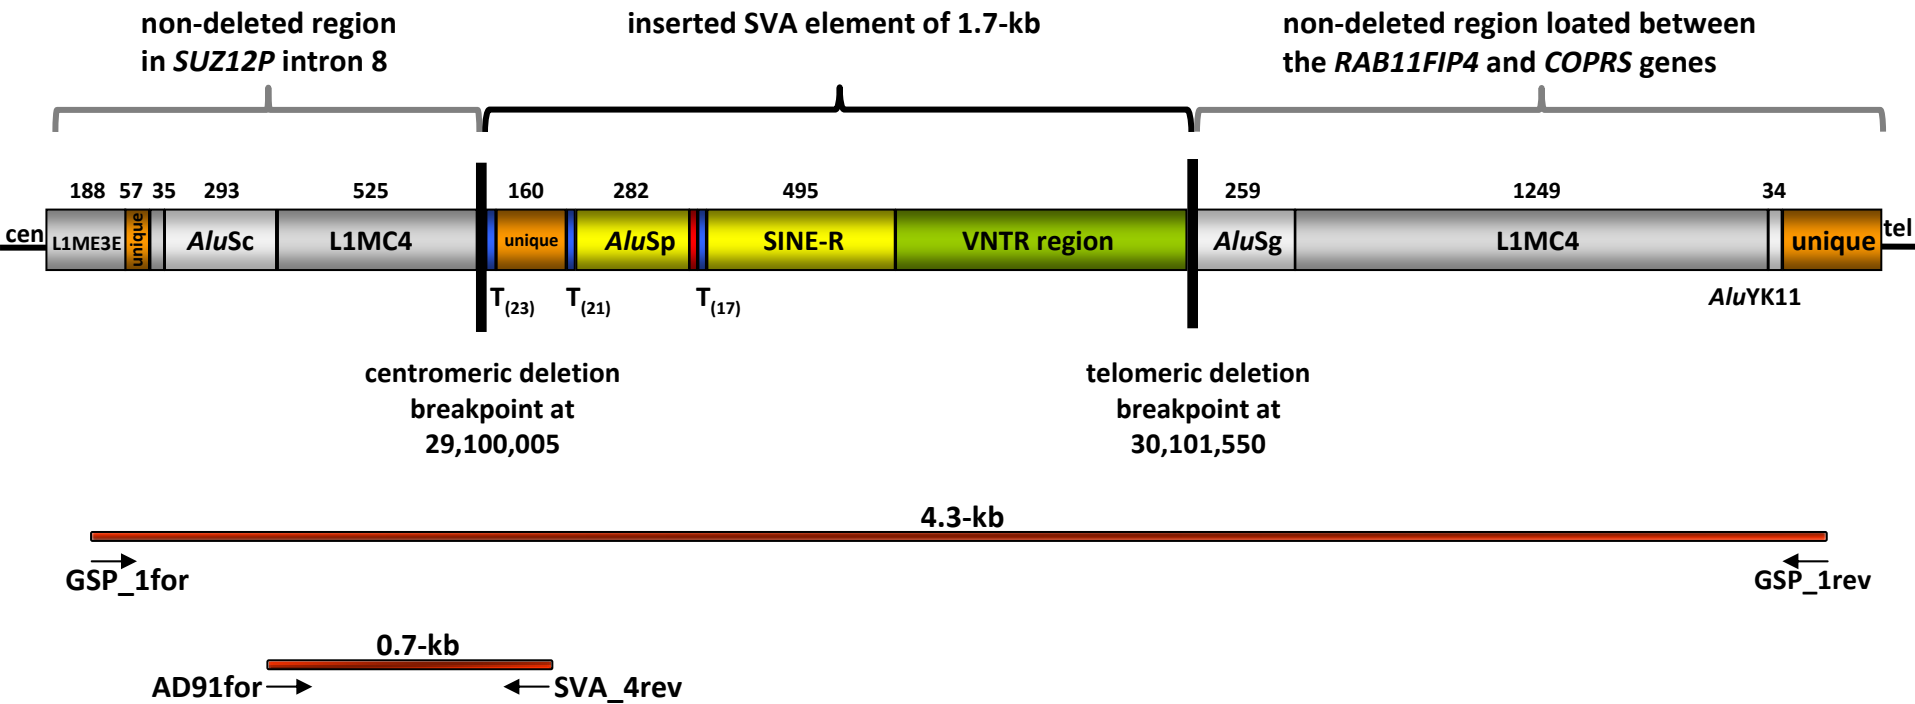

**Figure S8:** PCRs performed in order to amplify across the SVA element inserted at the breakpoints of the atypical *NF1* deletion identified in patient DA-77. The centromeric and the telomeric breakpoint regions within 17q11.2 and the inserted SVA element are indicated. Breakpoint-spanning PCRs were performed with primers GSP\_1for and GSP\_1rev (indicated by arrows). PCR with primers AD91for and SVA\_4rev was also performed to characterize the insertion site of the SVA element. Sequence analysis of these PCR products revealed the structure of the inserted SVA element at the deletion breakpoints in patient DA-77 and indicated that the centromeric deletion breakpoint was located within intron 8 of *SUZ12P* whereas the telomeric breakpoint was located in an intergenic region between the *RAB11FIP4* and *COPRS* genes.

**Figure S9:** Sequence of the inserted SVA element identified at the deletion breakpoints of patient DA-77.

TTTTTTTTTTTTTTTTTTTTTTTTTTTTGGATTGTAAAGATATTTTATTTCTTAGA T<sub>(23)</sub>, poly-adenylation  
 GACTTTCTAAGAAGGAAAAGGCATATAAGTAAATCTTATTAGACCTTCAC signal, unique  
 TGTAAAGGACATATCATATTTTATTTCATACACATGCTGGAATTATTGGTGC poly-adenylation signal  
 AGACATTTAAATACATTTTCTTTGAGAAAGTCCTTTTTTTTTTTTTTTTTTT T<sub>(21)</sub>  
**TTTT**GATGGAGTTTCCCTCTTGTGGCCAGGCTGGAGTGCAATGGTGCAA **AluSp**  
 TCTCAGCTCACAACAACCTCTGCCTCCTGGGTTCAAGCAATTCTCCTGCC  
 TCAGCCTCCCAAGTAGCTGGGATTACAGGCATGCACCACCACGCCAGCT  
 AATTTTTTTTTATTTTTAGTAGAGACGGGGTTTCTCCGTGTTGGTCAGGCT  
 GGTCTTGAACCTCTGATCTCAGGTGATCTGCCACCTTGGCCTGCCACAG  
 TGCTGGGATTACAGTCGTGAGCCACCACAGCTGGCTGGG**AAAGTCCATT** TSD  
**CT**TTTTTTTCTTTTTTTTTTTTTTTTTTAAATTTATTTTTTTATTGATAAT T<sub>(17)</sub>, poly-adenylation  
 TCTTGGGTGTTTCTCACAGAGGGGGATTGGCAGGGTCATGGGACAATAG signal, SINE-R  
 TGGAGGGAAGGTGAGCAGATAAACAAGTGAACAAAGGTCTCTGGTTTTTCC  
 TAGGCAGAGGACCCCGCGCCTTCCGCAGTGTGTGTCCCTGATTACTT  
 GAGATTAGGGATTGGTGATGACTCTTAACGAGCATGCTGCCTTCAAGCAT  
 CTGTTTAAACAAAGCACATCTTGCACTGCCCTTAATCCATTTAACCTGAG  
 TGGACACAGCACATGTTTTCAGAGAGCACAGGGTTGGGGTAAGGTCACAG  
 ATCAACAGGATCCCAAGGCAGAGGAATTTTTCTTAGTGAGAACAATAATG  
 AAAAGTCTCCCATGTCTACTTCTTTCTACACAGACACGGCAACCATCCGA  
 TTTCTCAATCTTTTCCCCACCTTTCCCGCCTTTCTATTCCACAAAGCCGC  
 CATTGTATCCTGGCCCGTTCTCAATGAGCTGTTGG**GCACACCTCCAGA** VNTR  
**CGGGTGGTGGCCGGCAGAGGGCTCCTCACTTCCAGTAGGGGCGGCC**  
**GGCAGAGGCGCCCTCACCTCCCGGACGGGGCGGCTGGCCGGGCAGGGG**  
**GGCTGACCCCCCACCTCCCTCCCGGACGGGGCGGCTGCCGGGCGGGG**  
**GGCTGACCCCCAACCTCCCTCCCGGACGGGGCGGCTGGCCGGGCGGGG**  
**GCTGACCCCCCACCTCCCTCCCGGACGGGGCGGCTGGCCGGGCAGAGGG**  
**GCTCCTCACTTCCAGTAGGGGCGGCCAGGCAGAGGCGCCCTCACCTCC**  
**CGGACGGGGCGGCTGGCCGGGCAGGGGGCCGACCCCCCACCTCCCTCC**  
**CGGACGGGGCGGCTGGCCGGGCAGGGGGCCGACCCCCCACCTCCCTCC**  
**GGACGGGGCGGCTGGCCGGGCAGAGGGGCTCCTCACTTCCAGTAGGGG**  
**GGCCGGGCAGAGGCGCCCTCACCTCCAGACGGGGCGGCTGGCCGGGCG**  
**GAGGGCTGAGCCCCCATCTCCCTCCCGGACGGGGTGGCTGGCCGGGCTG**  
**AGGGGCTCCTCACTTCCAGTAGGGGCGGCCGGGCAGAGGCGCCCTCAC**  
**CTCCCGGACGGGGCGGCTGGCCGGGCAGGGGGCTGACCCCCCACCTCC**  
**TCCCGGATGGCACGGCTGGCCGGGCGGGG**

Bold letters: nucleotides that differ from the source element H10\_1  
 TSD: target site duplication  
 VNTR: variable number of tandem repeats

**Figure S10:** Sequence of the full-length SVA element H10\_1, genomic position 101,596,732-101,600,770; hg19.

AAGAATGGACTTTTACTGTGACAGGCCTAGGGGGTCTGGAGGGCTCTGGT TSD, 5' TD  
TCACACCTCAGGATGCCTGGAGCCCCTAGGTTTTCTGATTTCTATCTCC  
ATCCTCACTGGCAGGAAAGCTTCTGGAAGTAGGAGAGGGTTGCTTAAGAG  
GATGAGGGGTGAGGACCAGAGATGGAGGAGGAAAAGAAAGCTCACAGGTG  
GCTGGGGCGCAGTGGCTCACACCTATAATCCCAGCGCTTTGGGAGGCTGAG AluSc  
GCGGGCGGATCATGAGGTCAAGAGATTGAGATGATCCTGGCCAACATGGT  
GAAACCCCTTCTCTACTAAAAACAAACAAACAAAAATAGCTGGGCGTGGT  
GGTGCACACCTGTAGTCCCAGCTACTCAGGAGGCTGAGGCTGAGGCAGGA  
AAATCGCTTCAACCTGGGAGGCAGAGGTTGCAGTGAGCCGAGATTGCACC  
ACTGCACTCCACCCAGACAACAGAGCAAGACTCCGTCTCAAAAAATAAAA  
TAAAATAAAAAGGAAAAGAAA AAAAGAAATTTAGGCAGAGGAGGTGCGCGC MAST2 Exon1  
GCCGGAGGCCCCAGAAGGGTCTGAAGGCGCCGCGGGCTGGGGTCTGGTGGCT  
TAGGGAGCCCCGTCCGGCCATGGTGGCCGCGGCTGGTGGTTGGCGCGGCTG  
CGCTGCGGGCCCGGGCAGTGCAGGAGCCAGGACAGTGCAGGCGCTGACGCC  
CGCGGGCCCCAGCTGCAGATATGAAGCGGAGCCGCTGCCGCGACCGACCG  
CAGCCGCGCGCCCGACCGCCGGGAGGATGGAGTTCAGCGGGCAGCGGA  
GCTGTCTCAGTCTTGGCCGCGCGCGGGGAGCGCCGCGGGAGGCAGC  
GGCTGGAGGAGCGGACGGGCCCCCGGGGGCCCCGAGGGCAAGGAGCAGCCG Alu-like  
CCTGCCTTGGCCTCCCAAAGTGCCGAGATTGCAGCCTCTGCCCGGCTGCC VNTR  
ACCCCGTCTGGGAAGTGAGGAGTGTCTCTGCCTGGCCGCCATCGTCTGG  
GATGTGAGGAGCCCCTCTGCCTGGCTGCCAGTCTGGAAAGTGAGGAGCG  
TCTCCGCCCCGCGCCATCCCATCTAGGAAGTGAGGAGCGCCTCTTCCCA  
GCCGCCATCACATCTAGGAAGTGAGGAGCGTCTCTGCCCGCCGCCCATC  
GTCTGAGATGTGGGGAGCGCCTCTGCCCTCCGCCCCATCTGGGATGTGA  
GGAGCGCCTCTGCCCGGCCGAGACCCCGTCTGGGAGGTGAGGAGCGTCTC  
TGCCCGGCCGCCCGTCTGAGAAGTGAGGAGACCCCTCTGCCTGGCAACCA  
CCCCGTCTGAGAAGTGAGGAGCCCCTCCGCCCCGAGCTGCCCGTCTGA  
GAAGTAAGGAGCCTCTCCGCCCCGAGCCACCCCATCTGGGAAGTGAGGA  
GCGTCTCCGCCCCGAGCCACCCCGTCCGGGAGGGAGGTGGGGGGGGTCC  
AGCCCCCGCCCCGCGCCAGCCGCCCATCCGGGAGGGAGGTGGGGGGTCCAG  
CCCCCGCCCCGCGCCAGCCGCCCATCCGGGAGGGAGGTGGGGGGTCCAGCC  
CCCCCGCCCCGCGCCAGCCACCCCGTCCGGGAGGGAGGTGGGGGGTCCAGC  
CCCCCGCCCCGCGCCAGCCGCCCGTCCGGGAGGGAGGTGGGGGGGGTCCAGC  
CCCCCGCCCCGCGCCAGCCGCCCGTCCGGGAGGGAGGTGGGGGGGGTCCAGC  
CGGCCGCCCTACTGGGAAGTGAGGAGCCCCTCTGCCCGGCCAGCCGCC  
CGTCCGGGAGGGAGGTGGGGGGGTCCGCCCCCGCCCCGCGCCAGCCGCC  
GTCCGGGAGGGAGGTGGGGGGGTCCGCCCCCGCCCCGCGCCAGCCGCC  
TCCGGGAGGGAGGTGGGGGGGTCCGCCCCCGCCCCGCGCCAGCCGCCCGT  
CCGGGAGGGAGGTGGGGGGGGGTCTGCCCGCTGCCCGGCCAGCCGCC  
CGTCCGGGAGGTGAGGGGGCGCCTCTGCCCGGCCGCCCTACTGGGAAGTG  
AGGAGCCCCTCTGCCCGGCCAGCCGCCCGTCCGGGAGGGAGGTGAGGGG  
GTCGGCCCCCGCCCCGCGCCAGCCGCCCGTCCGGGAGGTGAGGGGGCGCT  
CTGCCCGGCCGCCCTACTGGGAAGTGAGGAGCCCCTCTGCCCGGCCAGC  
CGCCCCGTCCGGGAGGGAGGTGGGGGGGTCCAGCCCCCGCCCCGCGCCAGCC  
GCCCGTCCGGGAGGGAGGTGGGGGGGTCCAGCCCCCGCCCCGCGCCAGCC  
CGCCCTGTCCGGGAGGGAGGTGGGGGGGTCCAGCCCCCGCCCCGCGCCAGCC  
GTGCCATCCGGGAGGGAGGTGGGGGGGTCCAGCCCCCGCCCCGCGCCAGCCG  
CCCCGTCCGGGAGGTGAGGGGGCGCCTCTGCCCGGCCGCCCTACTGGGAA  
GTGAGGAGCCCCTCAGCCCGGCCAGCCACCCCGTCCGGGAGGGAGATGGG  
GGGCTCAGCCCTCCGCCCCGCGCCAGCCGCCCGTCTGGGAGGTGAGGGGGC  
CCTCTGCCCGGCCGCCCTACTGGGAAGTGAGGAGCCCCTCTGCCCGGCC  
AGCCGCCCGTCCGGGAGGGAGGTGGGGGGGTCCGCCCCCGCCCCGCGCCA  
GCCGCCCGTCCGGGAGGGAGGTGGGGGGGTCCGCCCCCGCCCCGCGCCAG  
CCGCCCGTCCGGGAGGGAGGTGGGGGGGTCCGCCCCCGTCCCGGCCA  
GCCGCCCGTCCGGGAGGTGAGGGGGCGCCTCTGCCTGGCCGCCCTACTG  
GGAAGTGAGGAGCCCCTCTGCCCGGCCAGCCGCCCGTCCGGGAGGGAGG  
TGGGGGGTCCAGCCCCCGCCCCGCGCCAGCCGCCCGTCCGGGAGGGAGGT

TGGGGGGT CAGCCCCCGCCCGCCAGCCCGCCCGTCCGGGAGGGAGGTG  
 GGGGGGGT CAGCCCCCTGCCCGGCCAGCCCGCCCGTCCGGGAGGTGAGG  
 GGCGCCTCTGCCCGCCCGCCCTACTGGGAAGTGAGGAGCCCCCTCTGCC  
 GGCCACCACCCCGTCTGGGAGGTGTGC CCAACAGCTCATTGAGAACGGGC SINE-R  
 CAGGATGACAATGGCGGCATTGTGGAATAGAAAGGCGGGAAAGGTGGGGA  
 AAAGATTGAGAAATCGGATGGTTGCCGTGTCTGTGTAGAAAGAAGTAGAC  
 ATGGGAGACTTTTCATTTTGTCTGCTACTAAGAAAAATTCCTCTGCCTTG  
 GGATCCTGTTGATCTGTGACCTTACCCCCAACCCCTGTGCTCTCTGAAACA  
 TGTGCTGTGTCCACTCAGGGTTAAATGGATTAAGGGCAGTGCAAGATGTG  
 CTTTGTAAACAGATGCTTGAAGGCAGCATGCTCGTTAAGAGTCATCACC  
 AATCCCTAATCTCAAGTAATCAGGGACACAAACACTGCGGAAGGCCGCGG  
 GGTCCCTCTGCCTAGGAAAACCAGAGACCTTTGTTCACTTGTATTATCTGCT  
 GACCTTCCCTCCACTATTGTCCCATGACCCTGCCAAATCCCCCTCTGTGA  
 GAAACACCCAAGAATTATCAATAAAAAATAAATTTAAAAAAAAAAAAA poly-adenylation signal,  
 AAAGAAAAAAGAATGGACTTTCCAGGCCAGCTGTGGTGGCTCACGAC A<sub>(17)</sub>, TSD, AluSp  
 TGTAATCCCAGCACTGTGGCAGGCCAAGGTGGGCAGATCACCTGAGATCA  
 GGAGTTCAAGACCAGCCTGACCAACACGGAGAAACCCCGTCTCTACTAAA  
 AATAAAAAAATTAGCTGGGCGTGGTGGTGCATGCCTGTAATCCCAGCTA  
 CTTGGGAGGCTGAGGCAGGAGAATTGCTTGAACCCAGGAGGCAGAGGTTG  
 TTGTGAGCTGAGATTGCACCATTGCACTCCAGCCTGGGCAACAAGAGGGA  
 AACTCCATCAAAAAAAAAAAAAAAAAGGACTTTCTCAAAGAAAATGTATT A<sub>(17)</sub>, unique  
 TAAATGTCTGCACCAATAATTCCAGCATGTGTATGAATAAATATGATATG poly-adenylation signal  
 TCCTTTACAGTGAAGGTCTAATAAGATTTACTTATATGCCTTTTCTTCT  
 TAGAAAGTCTCTAAGAAATAAATATCTTTACAATCAAACCTCCTGACCTG poly-adenylation signal  
 TCCACATTCCAAATAATGCTGAGCATCTTTAGCGCCTCAAGACACTTTGG  
 AAGCCACTCAAGAATTTTCTTCTGAAAAAGATCTTCTCTTTCCAGGA  
 CATACTGCTTGCCAGGGCTTAAGGATACTGGAGAATAATGCTCACCCGTG  
 TCACAAGACGGAAGCTTCCCTTTCTGTCATCAATGGTCTTACCTAAAAAT  
 TCCCAACTCTCTCTCCAACCTCCACTGCCTTCACTACCCAGAAAAGAG  
 TGTCACTGACTATGGAGAATCTCACATCCGTTCTCAGAAAAGTAAACAGAG  
 GATGTTCAAGTTACCCAGCACTTATTTGGTACTGGGTTACAAAATGCTCA  
 CAAATGTCATTTGACTTCCACCATGAGACAGGTGGAACCCTGTGAGATAG  
 GGTGTGTTCTGGCCATTACAAAAACAAAGAAATGGAGATTCTCCTTAGAG  
 AAGTCAAGGCAATTCACCCAGCTTGGTAAACGGCAGAGCTGTCATGGGGA

- 5'-TD: 5' transduction sequence
- TSD: target site duplication
- VNTR: variable number of tandem repeats

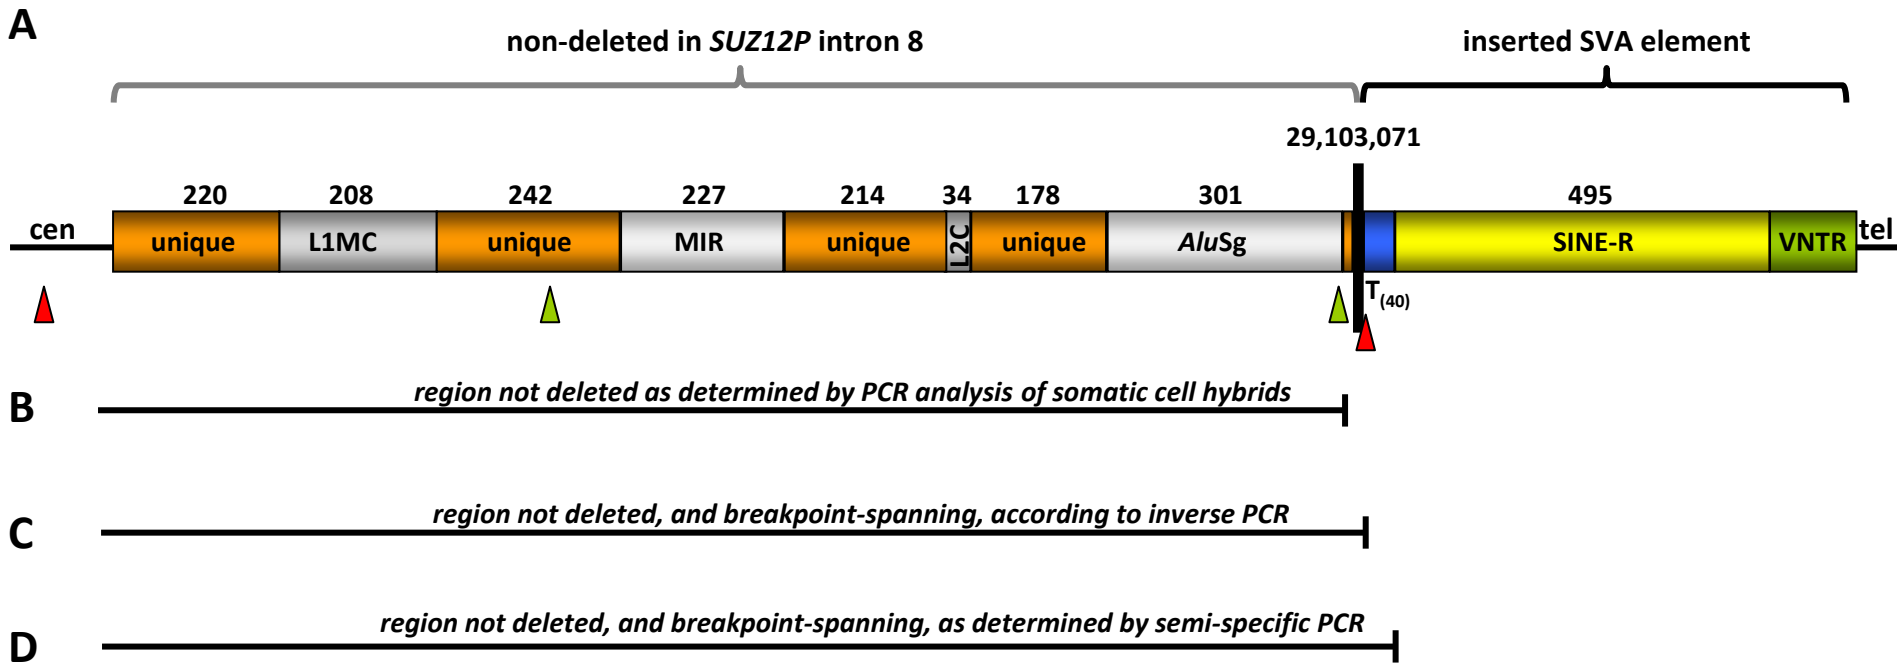

**Figure S11:** Identification of the centromeric deletion breakpoint in patient ASB4-55. **(A)** The breakpoint of the deletion is located within *SUZ12P* intron 8. The genomic region that is not deleted is indicated by a grey bracket. The lengths of the repetitive elements and unique sequences located within breakpoint-flanking regions are indicated in base-pairs. **(B)** Relative extent of the non-deleted regions as determined by PCR using DNA isolated from somatic hybrid cells containing only the chromosome 17 with the deletion and not the normal chromosome 17 from the patient. **(C)** Inverse PCR after restriction of genomic DNA with *PciI* (red triangles) and *HincII* (green triangles) indicated that the deletion breakpoint lies immediately adjacent to a poly $T_{(40)}$  tract that is not included in the reference sequence of the human genome (hg19). **(D)** Semi-specific PCR confirmed the presence of the poly $T$  tract at the deletion breakpoint. Breakpoint-spanning PCR as indicated in Figure S13 revealed that the breakpoint of the deletion and the insertion of the SVA element occurred at genomic position 29,103,071.

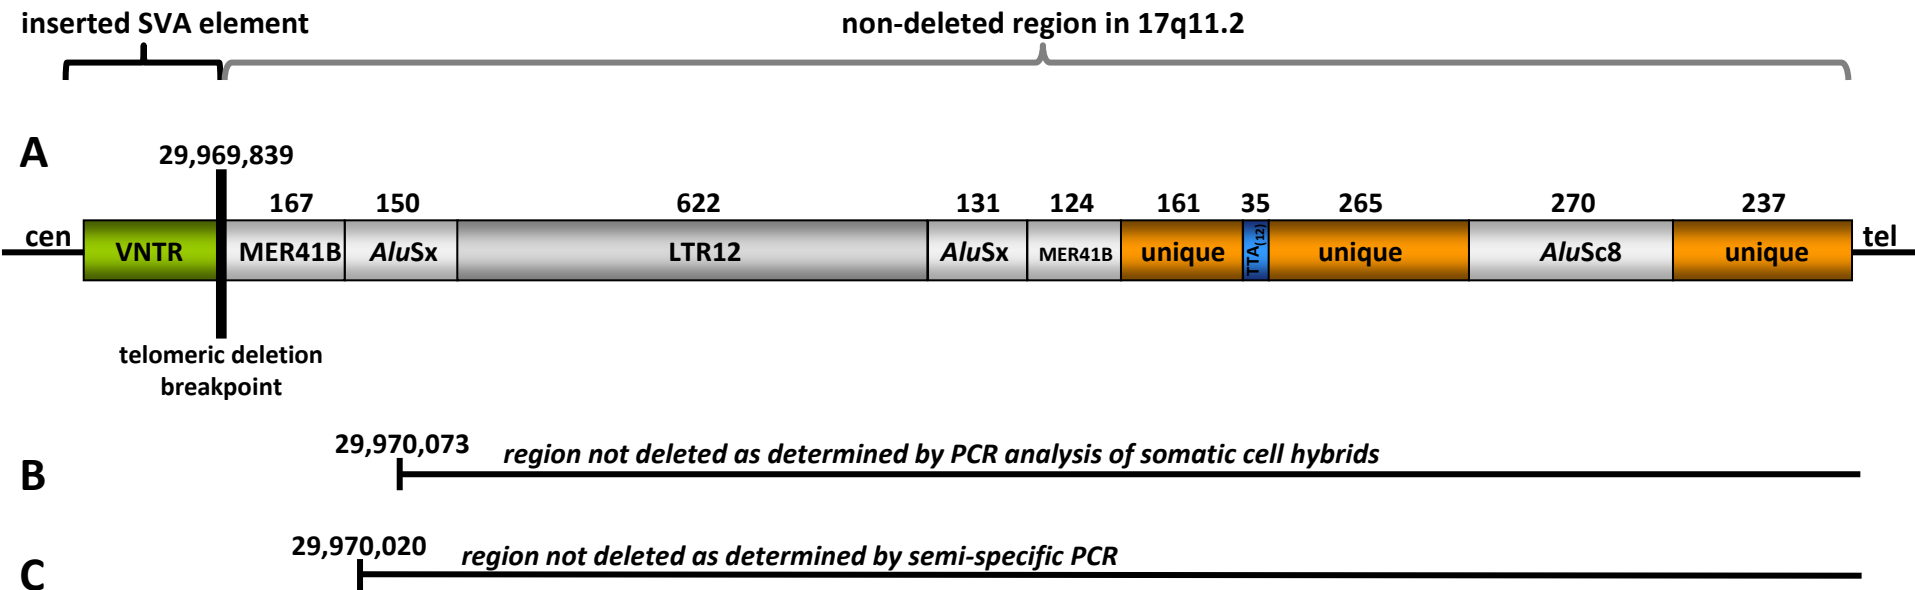

**Figure S12:** Analysis of the telomeric breakpoint-flanking region in patient ASB4-55. **(A)** The telomeric breakpoint region is located between the *RAB11FIP4* and *COPRS* genes. The lengths of the repetitive elements and unique sequences located close to the deletion breakpoint are indicated in base-pairs. **(B and C)** Array CGH analysis suggested that the breakpoint should be located between nucleotide positions 29,968,972 and 29,971,033. The breakpoint region was further narrowed down by PCR using DNA isolated from somatic cell hybrids containing only the chromosome 17 harbouring the deletion from the patient as well as semi-specific PCR. These experiments indicated that the genomic region telomeric to position 29,970,020 was not deleted. Breakpoint-spanning PCR with primers indicated in Figure S13 revealed that the breakpoint was located within an MER41B element. In the reference sequence of the human genome (hg19), the corresponding MER41B element encompasses 300-bp. In patient ASB4-55, however, the MER41B element is truncated, spanning only 167-bp and is located immediately adjacent to the VNTR region of the inserted SVA element. Genomic position 29,969,839 demarcates the breakpoint of the deletion and the insertion of the SVA element.

**A**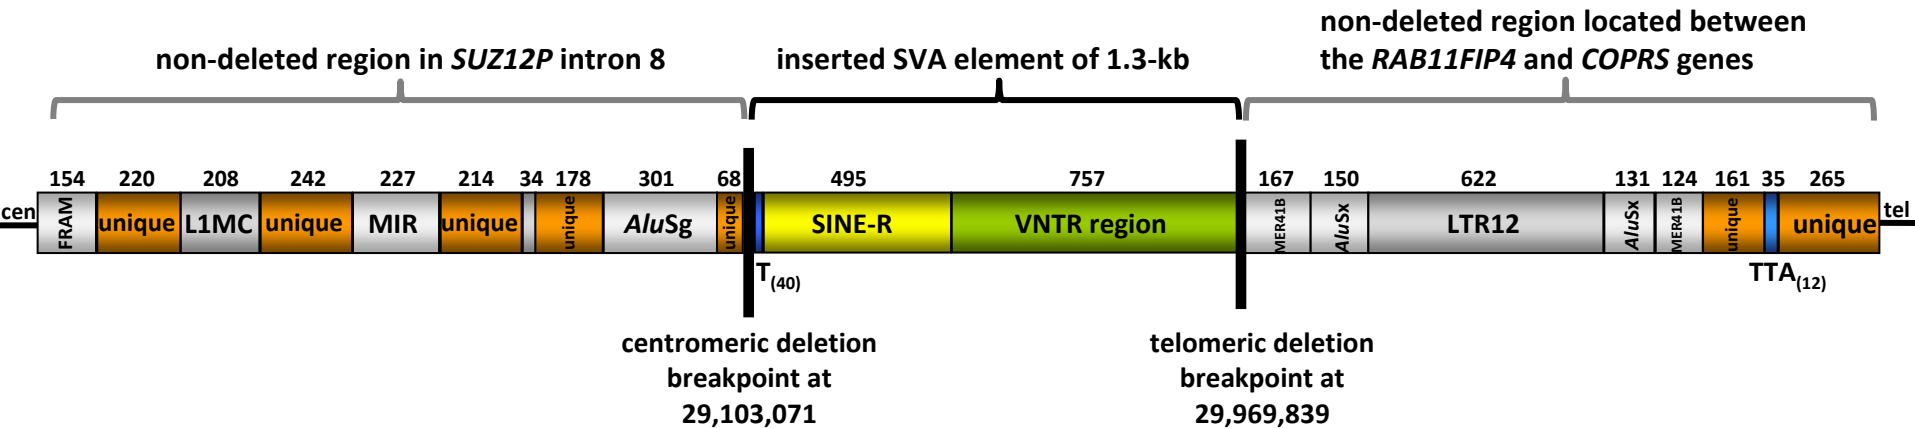**B**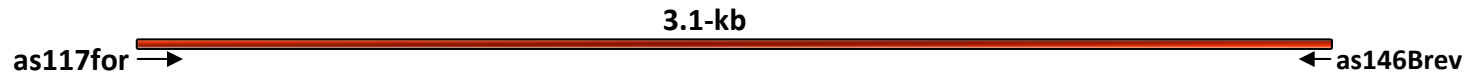

**Figure S13:** Structure of the deletion breakpoint region in patient ASB4-55. **(A)** Schematic representation of the 17q11.2 region harbouring the SVA insertion-associated *NF1* deletion in this patient. Indicated are the centromeric and telomeric regions flanking the deletion breakpoints within 17q11.2 and the inserted SVA element. The lengths of the repetitive and unique sequences located within the breakpoint-flanking regions are indicated in base-pairs. **(B)** PCR performed in order to amplify across the SVA element inserted at the breakpoints of the atypical *NF1* deletion identified in patient ASB4-55. Breakpoint-spanning PCR was performed with primers as117for and as146Brev. Sequence analysis of the corresponding PCR product indicated the structure of the SVA element as well as its insertion sites.



**Figure S14:** Sequence of the full-length SVA element H6\_1084, genomic position: 123,168,910-123,171,600; hg19.

```

AAAAGAATACAAAATAGGTGGGGAAAGGGCAAGAAGGCAGGGGAATCACCATGTTTGGGT TSD
GGACCTAGTTTCTAATGGCTTGCATTTACATATCAAAGGTTGCCAGCCTGGCTCTAAGAG 5' TD
CCGGGGCTATACAAGAAACTTTTCCGGCTCTCCCTCTCCCTCTGTCTCCCTCTCCCCACG Hexamer
GTCTCCCTCTCATGCGGAGCCGAAGCTGGACTGTACTGCTGCCATCTCGGCTCACTGCAA Alu-like
CCTCCCTGCCTGATTCTCCTGCCTCAGCCTGCCAGTGCCATGGCGCCGCCACGCC
TGACTGGTTTTTGGTGGAGACGGGGTTTTCGCTGTGTTGGCCGGGCCGGTCTCCAGCCCCTA
ACCGCGAGTGATCCCGCCAACCTCAGCCTCCCAGGTTGCCGGATTGCAGACGGAGTCTC
GTTCACTCAGTGCTCAATGGTGGCCAGGCTGGAGTGCAGTGGCGTGATCTCGGCTACTA
CAACCTACACCTCCCAGCCGCTGCCTTGGCCTCCCAAAGTGCCGAGATTGCAGCCTCTG VNTR
CCCGGCCGCCACCCCGTCTGGGAAGTGAGGAGCCTCTCTGCCTGGCCGCCCATCGTCTGG
GATGTGAGGAGCCCCTCTGCCTGGCTGCCAGTCTGGAAAGTGAGGAGCGTCTCCGCCCG
GCCGCCATCCCATCTAGGAAGTGAGGAGCGCCTCTTCCCAGCCGCCATCACATCTAGGAA
GTGAGGAGCGTCTCTGCCCGGCCGCCCATCGTCTGAGATGTGGGGAGCGCCTCTGCCCCG
CCGCCCATCTGGGATGTGAGGAGTGCCTCTGCCCGGCTGAGACCCCGTCTGGGAGGTGA
GGAGCGTCTCTGCCCGGCCGCCCGTCTGAGAAGTGAGGAGACCCTCTGCCTGGCAACCA
CCCCGTCTGAGAAGTGAGGAGCCCCTCCGCCCGGCAGCTGCCCGTCTGAGAAGTGAGGA
GCCTCTCCGCCCGGCAGCCACCCCATCTGGGAAGTGAGGAGCATCTCCGCCAGCAGCCA
CCCCGTCCGGGAGGGAGGTGGGAGGGGGTCAACCCCCCGCCAGCCGCCCATCTG
GGAGGAGGTGGGGGTGAGCCCCCGACCCCGCCAGCCCGTCCATCCGGGAGGGAGGTG
GGGGGTGAGCCCCCGCCCGGCCAGCCCGTCCGGGAGGTGAGGGGTGCTCTGCC
CGGCCGCCCTACTGGGAAGTGAGGAGCCCCTCAGCCCGGCCAGCCACCCGTCCGGGAG
GGAGATGGGGGGTCAACCCCCCGCCAGCCCGCCCGTCCGGGAGGGAGGTGGGG
GGGTAAGCCCCCGCCTGGCCAGCCGCCCGTCAAGAAAGGAGGTGGGGGGTCAAGCCCT
CCGCCCGGCCAGCCGCCCGTCCGGGAGGTGAGGGGGCGCCTCTGCCCGGCCGCCCTACT
GGGAAGTGAGGAGCCCCTCTGCCCGGCCAGCCCGCCCGTCCGGGAGGGAGGTGGGGGGG
TCAGCCCCCGCCCGGCCCGCCCGTCCGGGAGGGAGGTGGGGGGGTCAAGCCCC
GCCTGGCCAGCCGCCCTGTCCGGGAGGGAGGTGGGGGGGGTCAAGCCCTCCGCCGCCA
GCCGCCCGTCTGGGAGGTGAGGGGGCGCCGTGCCCGGCCGCCCTACTGGGAAGTGAGG
AGCCCTCTGCCCGGCCAGCCGCCCGTCCGGGAGGGAGGTGGGGGGGGTCAAGCCCCG
CCCGGCCGCCCGCCTGTCCGGGAGGGAGGTGGGGGGGTCAAGCCCTCCGCCGCCAGCC
GCCCGTCCGGGAGGTGAGGGGGCGCCTCTGCCCGGCCGCCCTACTGGGAAGTGAGGAGC
CCCTCTGCCCGGCCAGCCGCCCGTCCCGGAGGGAGGTGGGGGGGGTCAAGCCCCCTGCC
CGGCCAGCCGCCCGTCCGGGAGGTGAGGGGGCGCCTCTGCCAGCCGCCCTACTGGGAA
GTGAGGAGCCCCTCTGCCCGGCCAGCCGCCCGTCCGGGAGGGAGGTGGGGGGGGTCAAGC
CCCCCGCCCGGCCAGCCGCCCGTCCGGGAGGTGAGGGGGCGCCTCTGCCCGGCCGCC
TACTGGGAAGTGAGGAGCCCCTCTGCCCGGCCAGCCCGTCCGGGAGGTGAGGGGGCGCCTCTGCCCGGCCGCC
CCAAC
AGCTCATTGAGAACGGGCCAGGATGACAATGGCGGCTTTGTGGAATAGAAAGGCAGGAAA SINE-R
GGTGGGGAAAAGATTGAGAAATCGGATGGTTGCCGTGTCTGTGTAGAAAGAAGTAGACAT
GGGAGACTTTTCATTTTGTCTGCACTAAGAAAAATTCCTCTGCCTTGGGATCCTGTTGA
TCTGTGACCTTACCCCCAACCCCTGTGCTCTCTGAAACATGTGCTGTGTCCACTCAGGGTT
AAATGGATTAAGGGCGGTGCAAGATGTGCTTTGTAAACAGATGCTTGAAGGCAGCATGC
TCGTTAAGAATCATACCAATCCCTAATCTCAAGTAATCAGGGACACAAACACTGCGGAA
GGCCGCAGGGTCTCTGCCTAGGAAAACCAGAGACCTTTGTTCACTTGTATTATCTGCTGA
CCTTCCCTCCACTATTGTCCCATGACCCTGCCAAATCCCCCTCTGTGAGAAACACCCAAG
AATTATCAATAAAAAATAAATTTAAAAAATAAAGAAATAACAAAATA poly-adenylation
signal, A(11), TSD

```

TSD: target site duplication  
 VNTR: variable number of tandem repeats

**Figure S15:** Sequence of the inserted SVA element in *SUZ12P* intron 8 of patient ASB4-55.

```
TTTTTTTTTTTTTTTTTTTTTTTTTTTTTTTTTTTTTTTTTTTTTTTTTTTTTTTTTTTTTAAATTTATTT T(40), poly-adenylation signal  
TTTTATTGATAAATTCCTGGGTGTTTCTCACAGAGGGGGATTTGGCAGGGT SINE-R  
CATGGGACAATAGTGGAGGGAAGGTCAGCAGATAAAACAAGTGAACAAAGG  
TCTCTGGTTTTTCCTAGGCAGAGGACCCTGCGGCCTTCCGCAGTGTGTTGTG  
TCCCTGATTACTTGAGATTAGGGATTGGTGATGACTCTTAACGAGCATGC  
TGCCTTCAAGCATCTGTTTAACAAAGCACATCTTGCACCGCCCTTAATCC  
ATTTAACCCCTGAGTGGACACAGCACATGTTTCAGAGAGCACAGGGTTGGG  
GGTAAGGTCACAGATCAACAGGATCCCAAGGCAGAGGAATTTTTCTTAGT  
GCAGAACAAAATGAAAAGTCTCCCATGTCTACTTCTTTCTACACAGACAC  
GGCAACCATCCGATTTCTCAATCTTTTCCCCACCTTTCTGCCTTTCTAT  
TCCACAAAGCCGCCATTGTCATCTGGCCCGTTCTCAATGAGCTGTTGGG VNTR  
CACACCTCCCAGACGGGGTGGTGGCCGGGCAGAGGGGCTCCTCACTTCCC  
AGTAGGGGGCGGCCGGGCAGAGGGCGCCCTCACCTCCCAGGACGGGGCGGCT  
GGCCGGGCGGGGGGGCTGACCCCCCACCTCCCTCCCAGGACGGGGCGGC  
TGGCCGGGCAGAGGGGGCTGACACCCCCACCTCCCTCCCAGGACGGGGCGGC  
TGGCCGGGCAGAGGGGGCTCCTCACTTCCCAGTAGGGGCGGCCGGGCAGAG  
GCGCCCCCTCACCTCCCAGGACGGGGCGGCTGGCCGGGCAGGGGGGCTGACC  
CCCCCACCTCCCTCCGGGACGGGGCGGCTGGCCGGGCAGAGGGGCTCCT  
CACTTCCCAGTAGGGGCGGCCGGGCAGAGGCGCCCTCACCTCCCAGGACG  
GGGCGGCTGGCCGGGCAGGGGGGCTGACCTCCCCCACCTCCCTCCGGGAC  
GGGGCGGCTGGCCGGGCAGAGGGGCTCCTCACTTCCCAGTAGGGGCGGCC  
GGGCAGAGGCGCCCTCACCTCCCAGACGGGGCGGCTGGCCGGGCGGAGG  
GCTGACCCCCCACCTCCCTCCCAGGACGGGGCGGCTGGCCGGGCAGAGGGG  
TGACCCCCCACCTCCCTCCCAGGACGGGGCGGCTGGCCGGGCAGAGGGG  
CTCCTCACTTCCCAGTAGGGGCGGCGGGGCAGCGGCGCCCTCACCTCCC  
AGACGGGGCGGCTGGCCGGGCGGAGGGCTGACCCCCCACCTCCCTCC  
CGG
```

Bold letters: nucleotides that differ from those of the source element H6\_1084.  
Within the variable number of tandem repeats (VNTR) region indicated in green, a duplication of 178-bp (underlined sequence) was identified. The source element H6\_1084 does not include this duplication which is specific to the SVA copy identified in patient ASB4-55.

**Figure S16:** Alignment of the reference sequence of *SUZ12P* intron 8 (hg19) against the corresponding region in patient DA-77. The polyT tract of the SVA element inserted into *SUZ12P* intron 8 in this patient is marked in red. The LINE 1 endonuclease (L1 EN), most likely involved in the insertion of this SVA element, is known to exhibit substrate specificity and cleaves at specific L1 EN consensus cleavage sites such as 5'-TTTT/A-3' and 5'-CTTT/A-3' (Morrish et al., 2002). The L1 EN cleavage site 5'-TTTT/A-3' in the reference sequence hg19 is highlighted in yellow and the position of cleavage is indicated by an arrow. The SNP rs8071236 (T/C) is located within this sequence motif as highlighted in blue. The chromosome 17 sequence of patient DA-77 harbouring the SVA insertion exhibited the C-allele of this SNP. Hence, the corresponding L1 EN cleavage site was 5'-CTTT/A-3'.

```

Reference      5' - TTTTGGCAGGGATTCTAATGAGTGATGTGTT TTTTACGTACTACATCACA - 3'
DA-77         5' - TTTTGGCAGGGATTCTAATGAGTGATGTGTT CTTTTTTTTTTTTTTTTTTTTT - 3'

```

**Figure S17:** Alignment of the reference sequence of *SUZ12P* intron 8 (hg19) against the corresponding region in patient ASB4-55. The polyT tract of the SVA element inserted into *SUZ12P* intron 8 in this patient is marked in red. The LINE 1 endonuclease (L1 EN), most likely involved in the insertion of this SVA element, is known to exhibit substrate specificity and cleaves at specific L1 EN consensus cleavage sites such as 5'-CTTT/A-3' (Morrish et al., 2002). The L1 EN cleavage site 5'-CTTT/A-3' in the reference sequence hg19 is highlighted in yellow and the position of cleavage is indicated by an arrow.

```

Reference      5' - AGGTTTTGAGACCTCAGGCATATTATACTTTACATGTTTAGAGTTATATC - 3'
ASB4-55       5' - AGGTTTTGAGACCTCAGGCATATTATACTTTTTTTTTTTTTTTTTTTTTT - 3'

```

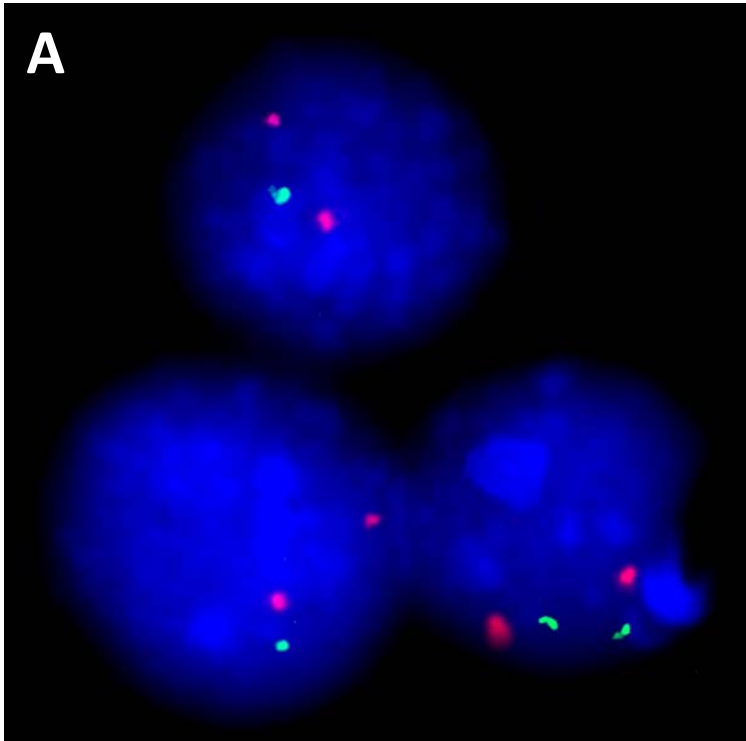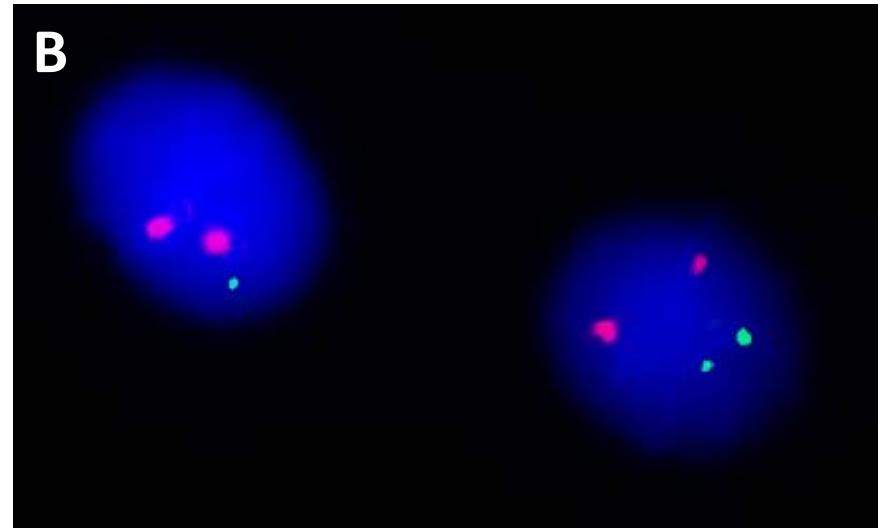

**Figure S18:** Representative FISH images indicating the somatic mosaicism of cells harbouring the *NF1* deletion and normal cells in the blood of the grandmother of patient DA-77 (A) and patient ASB4-55 (B). In each case, at least 200 interphase nuclei from cultured blood were investigated. Dual-colour FISH was performed with BAC RP11-142O6 which spans the proximal part of the *NF1* gene and the alpha-satellite enumeration probe SE17/D17Z1 (Kreatech, Amsterdam, Netherlands) which was used as a control. The *NF1* probe is visible in green whereas the control probe is visible in red.

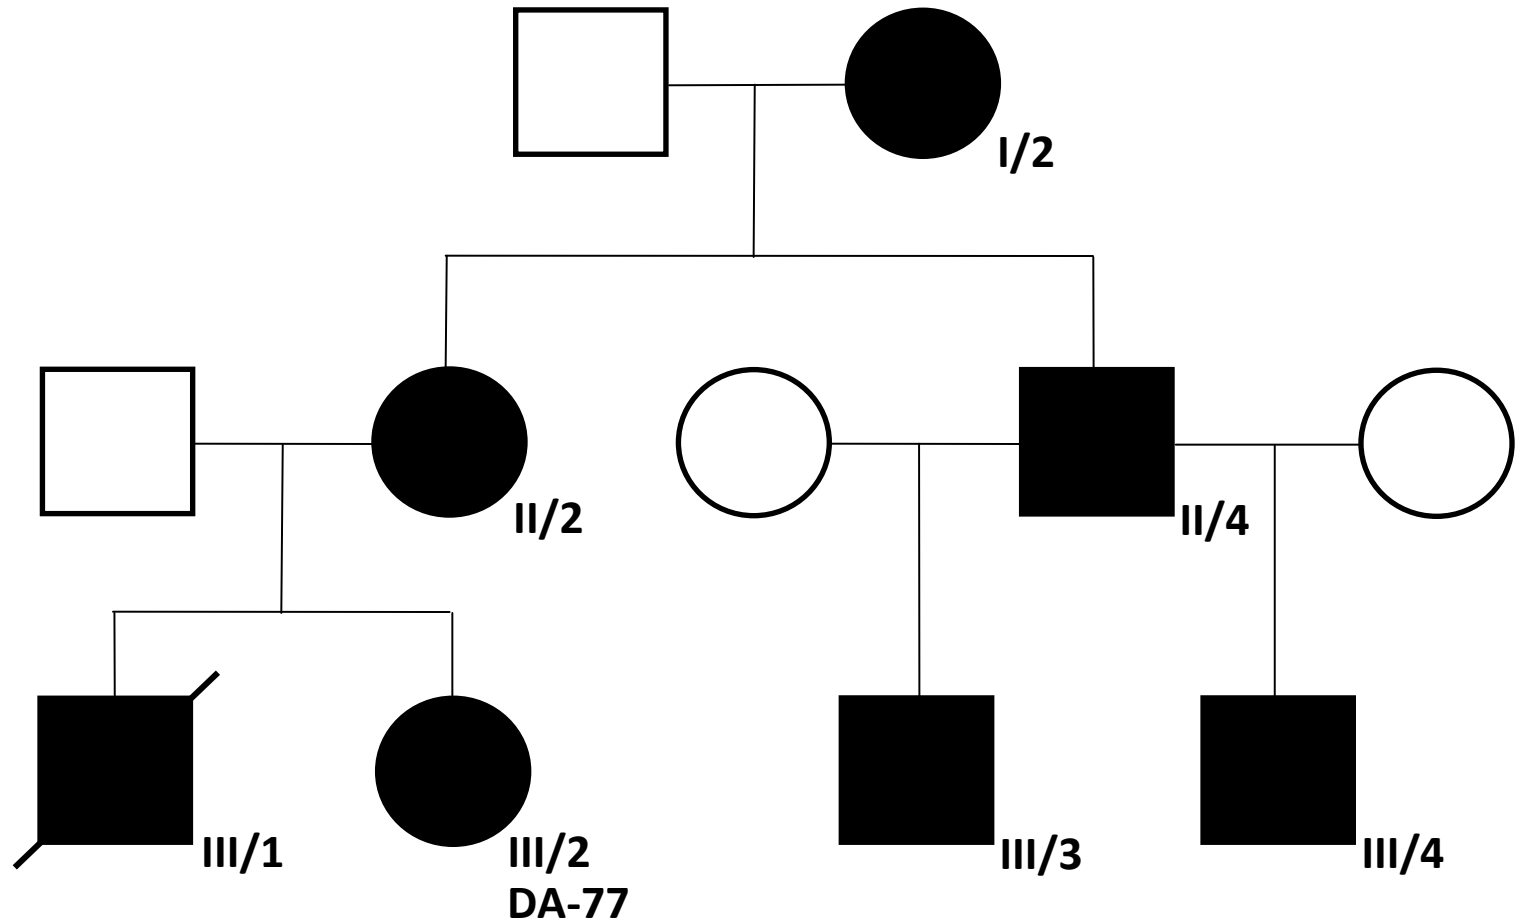

**Figure S19:** Segregation of the 1-Mb-spanning atypical *NF1* deletion in the family of patient DA-77 (III/2). The SVA insertion-associated *NF1* deletion was originally identified in patient III/2 and had occurred in the grandmother (I/2). It must have resulted from a postzygotic rearrangement since the grandmother (I/2) exhibited somatic mosaicism with normal cells as determined by FISH. The grandmother then passed on the SVA insertion-associated atypical *NF1* deletion to her offspring. The SVA insertion associated-deletion was verified in her grandchildren by PCR and sequence analysis of the corresponding PCR products (patients III/1, III/2, III/3 and III/4).

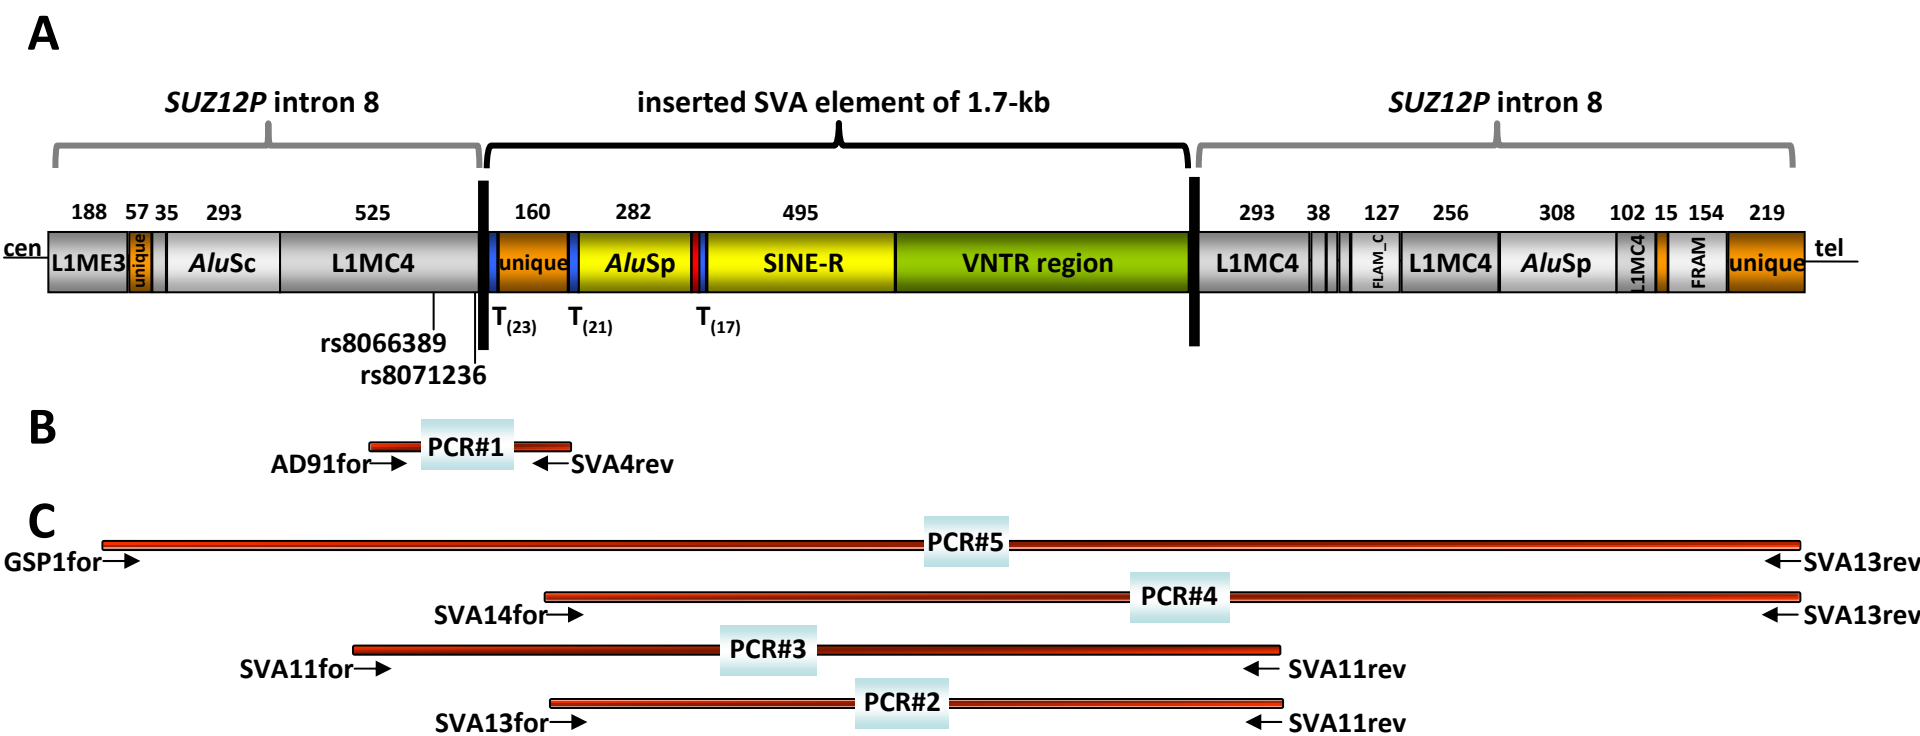

**Figure S20:** PCR analysis performed to investigate (i) whether the SVA insertion into *SUZ12P* intron 8 had occurred prior to the *NF1* deletion in the grandmother of patient DA-77 and (ii) whether the SVA insertion might represent a frequent insertion/deletion polymorphism at this position on chromosome 17 in healthy controls. **(A)** Structure of a hypothetical normal chromosome 17 lacking the large *NF1* deletion but possessing the insertion of the 1.7-kb SVA element within *SUZ12P* intron 8. **(B)** To investigate whether the insertion of the SVA element in *SUZ12P* intron 8 would be a frequent insertion/deletion polymorphism, 50 African and 50 white European DNA samples were analysed by PCR#1. However, PCR#1 was not positive in any of these DNA samples and hence it is unlikely that the SVA insertion would represent a frequent polymorphism. By contrast, PCR#1 was positive in patient DA-77 and her family members III/1, III/3, III/4 and I/2 who harboured the large *NF1* deletion and the SVA insertion at the deletion breakpoints. **(C)** To analyse whether the SVA insertion had preceded the occurrence of the large *NF1* deletion in the grandmother of patient DA-77, we investigated the potential presence of cells with the SVA insertion but lacking the large *NF1* deletion by PCR. The grandmother (I/2) exhibited somatic mosaicism in blood with 75% of cells harbouring the deletion whilst 25% of cells were normal as determined by FISH. However, PCR#2 and PCR#4 performed using blood-derived DNA from the grandmother were negative for the anticipated PCR products of 1.8-kb (PCR#2) and 3.3-kb (PCR#4) under the scenario of the SVA insertion being present whilst the large *NF1* deletion was absent. We therefore concluded that the grandmother did not possess a chromosome 17 which harbours the inserted SVA element without the large *NF1* deletion. This conclusion was further confirmed by PCRs #3 and #5 performed using genomic DNA from the grandmother. If the SVA element had been inserted into a chromosome 17 lacking the large *NF1* deletion, a PCR product of 4.3-kb would have been anticipated for PCR#5 and a 2.3-kb product for PCR#3. However, only shorter PCR products of 533-bp (PCR#3) and 2.6-kb (PCR#5) were obtained, which were derived from a normal chromosome 17 lacking the SVA element insertion. It might also have been possible that a full-length SVA element had inserted into chromosome 17. Therefore, PCRs #2-5 were also performed with elongation times ranging from 3–5 minutes in order to amplify PCR products up to 6.6-kb. However, under these conditions, only short PCR products of 533-bp (PCR#3) and 2.6-kb (PCR#5) were obtained, derived from a normal chromosome 17 lacking the SVA insertion. Sequence analysis of PCR#3 spanning 533-bp indicated the presence of two heterozygous SNPs (rs8066389 and rs8071236) thereby confirming the presence of two normal chromosomes 17 neither of which possessed an SVA insertion at the corresponding position in *SUZ12P* intron 8. We conclude that the large *NF1* deletion occurred concurrently with the SVA insertion.

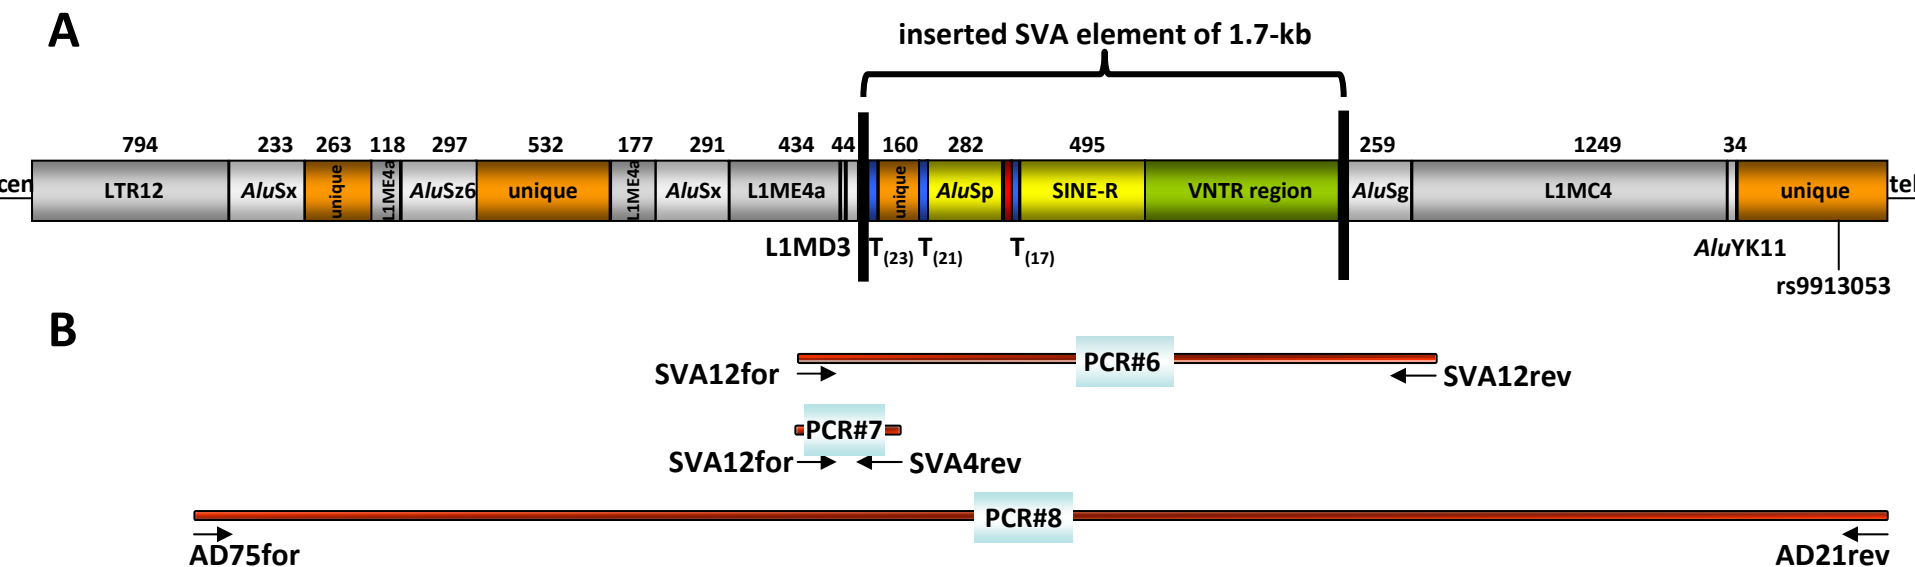

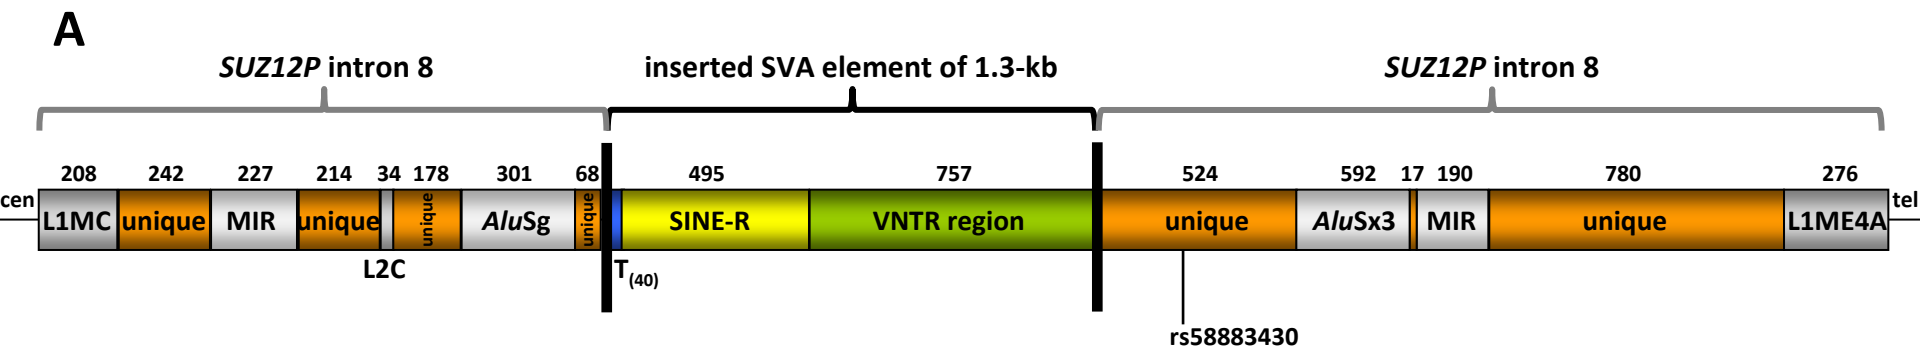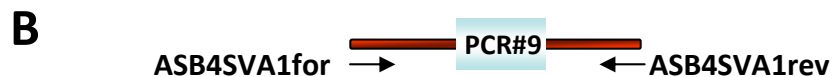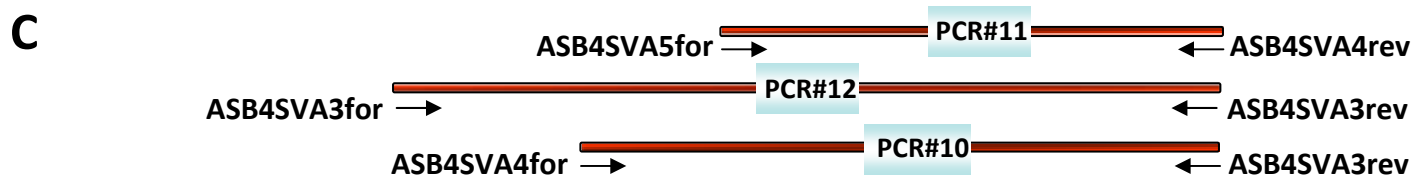

**Figure S22:** PCR analysis performed to investigate (i) whether the SVA element identified at the deletion breakpoint within *SUZ12P* intron 8 of patient ASB4-55 had inserted into chromosome 17 prior to the occurrence of the *NF1* deletion, and (ii) whether the SVA element might represent a frequent insertion/deletion polymorphism at this position on chromosome 17 in healthy controls. **(A)** Structure of a hypothetical chromosome 17 lacking the large *NF1* deletion but exhibiting the insertion of the 1.3-kb SVA element within *SUZ12P* intron 8. **(B)** To investigate whether the SVA insertion within *SUZ12P* intron 8 might represent a frequent insertion/deletion polymorphism, 50 African and 50 white European DNA samples were analysed by PCR#9. However, PCR#9 was not positive in any of these DNA samples and hence it is unlikely that the insertion represents a frequent polymorphism at this location in the human genome. By contrast, PCR#9 yielded a 800-bp spanning PCR product in patient ASB4-55 harbouring the large *NF1* deletion and the SVA insertion at the breakpoints. **(C)** In order to determine whether the insertion of the SVA element occurred prior to the large *NF1* deletion, we investigated genomic DNA from patient ASB4-55 by PCR. The patient exhibited somatic mosaicism for the deletion which was present in 93% of her blood cells as determined by FISH. PCRs #10 and #11 performed using blood-derived DNA from the patient as template were negative for the PCR product of 1.5-kb (PCR#10) and 1.3-kb (PCR#11) anticipated under the scenario of the SVA insertion being present whilst the large *NF1* deletion was absent. We therefore concluded that patient ASB4-55 did not possess a chromosome 17 lacking the large *NF1* deletion but harbouring the inserted SVA element within *SUZ12P* intron 8. This conclusion was further confirmed by PCR#12 performed using genomic DNA from the patient. If patient ASB4-55 were to possess a chromosome 17 with the SVA insertion but lacking the large *NF1* deletion, a PCR product of 2.1-kb would have been anticipated for PCR#12. However, PCR#12 yielded only a shorter PCR product of 854-bp which was derived from a normal chromosome 17 lacking the SVA insertion. It might also have been possible that a full-length SVA element had inserted into chromosome 17. Therefore, PCRs #10–12 were performed with elongation times of 3 minutes in order to amplify PCR products up to 4-kb corresponding to the size of a full-length SVA element. However, under these conditions, only shorter PCR products were obtained which were derived from a normal chromosome 17 lacking the SVA insertion. Sequence analysis of the PCR#12 product spanning 854-bp was indicative of one heterozygous SNP (rs58883430), thereby confirming the presence of two normal chromosomes 17 neither of which possessed an SVA insertion at the corresponding position in *SUZ12P* intron 8. We conclude that the large *NF1* deletion must have occurred concurrently with the SVA element insertion.



**A**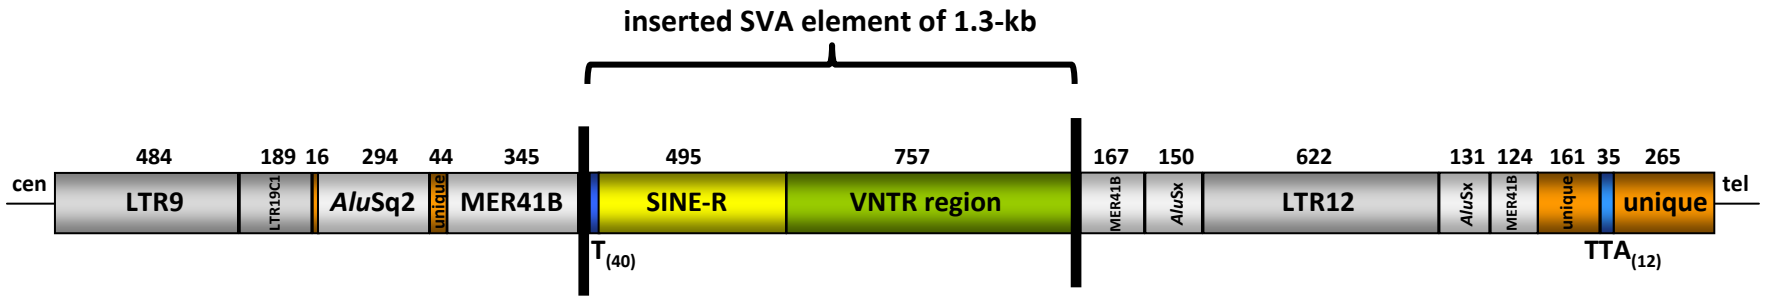**B**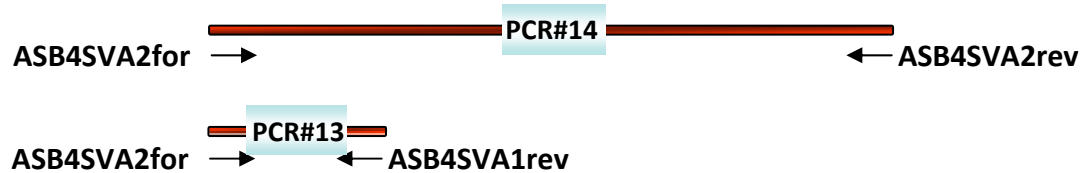

**Figure S23:** PCR analysis performed to investigate whether the SVA element identified at the deletion breakpoint of patient ASB4-55 had inserted into chromosome 17 within the intergenic region between *RAB11FIP4* and *COPRS* prior to the occurrence of the *NF1* deletion. **(A)** Structure of a hypothetical normal chromosome 17 lacking the large *NF1* deletion but possessing the 1.3-kb SVA element insertion within the intergenic region between *RAB11FIP4* and *COPRS*. **(B)** In order to ascertain whether the insertion of the SVA element occurred prior to the large *NF1* deletion, we investigated genomic DNA from patient ASB4-55. However, PCR#13 performed using blood-derived DNA of the patient as template was negative for the PCR product of 457-bp anticipated under the scenario of the SVA insertion being present whilst the large *NF1* deletion was absent. We concluded that patient ASB4-55 did not possess a normal chromosome 17 (lacking the *NF1* deletion) that nevertheless harboured the inserted SVA element within the intergenic region between *RAB11FIP4* and *COPRS*. This conclusion was further confirmed by PCR#14 performed using genomic DNA from the patient. If the SVA element had been inserted into a chromosome 17 lacking the large deletion, a PCR product of 1.7-kb would have been expected for PCR#14. However, only a shorter PCR product of 449-bp was obtained which was derived from a normal chromosome 17 without the SVA element insertion. It might also have been possible that a full-length SVA element had inserted into chromosome 17. Therefore, PCR#14 was also performed with an elongation time of 3 minutes in order to amplify PCR products up to 4-kb corresponding to the size of a full-length SVA element. However, under these conditions, only a short PCR product of 449-bp, derived from a normal chromosome 17 lacking the insertion, was obtained. We conclude that the large *NF1* deletion must have occurred concurrently with the SVA element insertion.

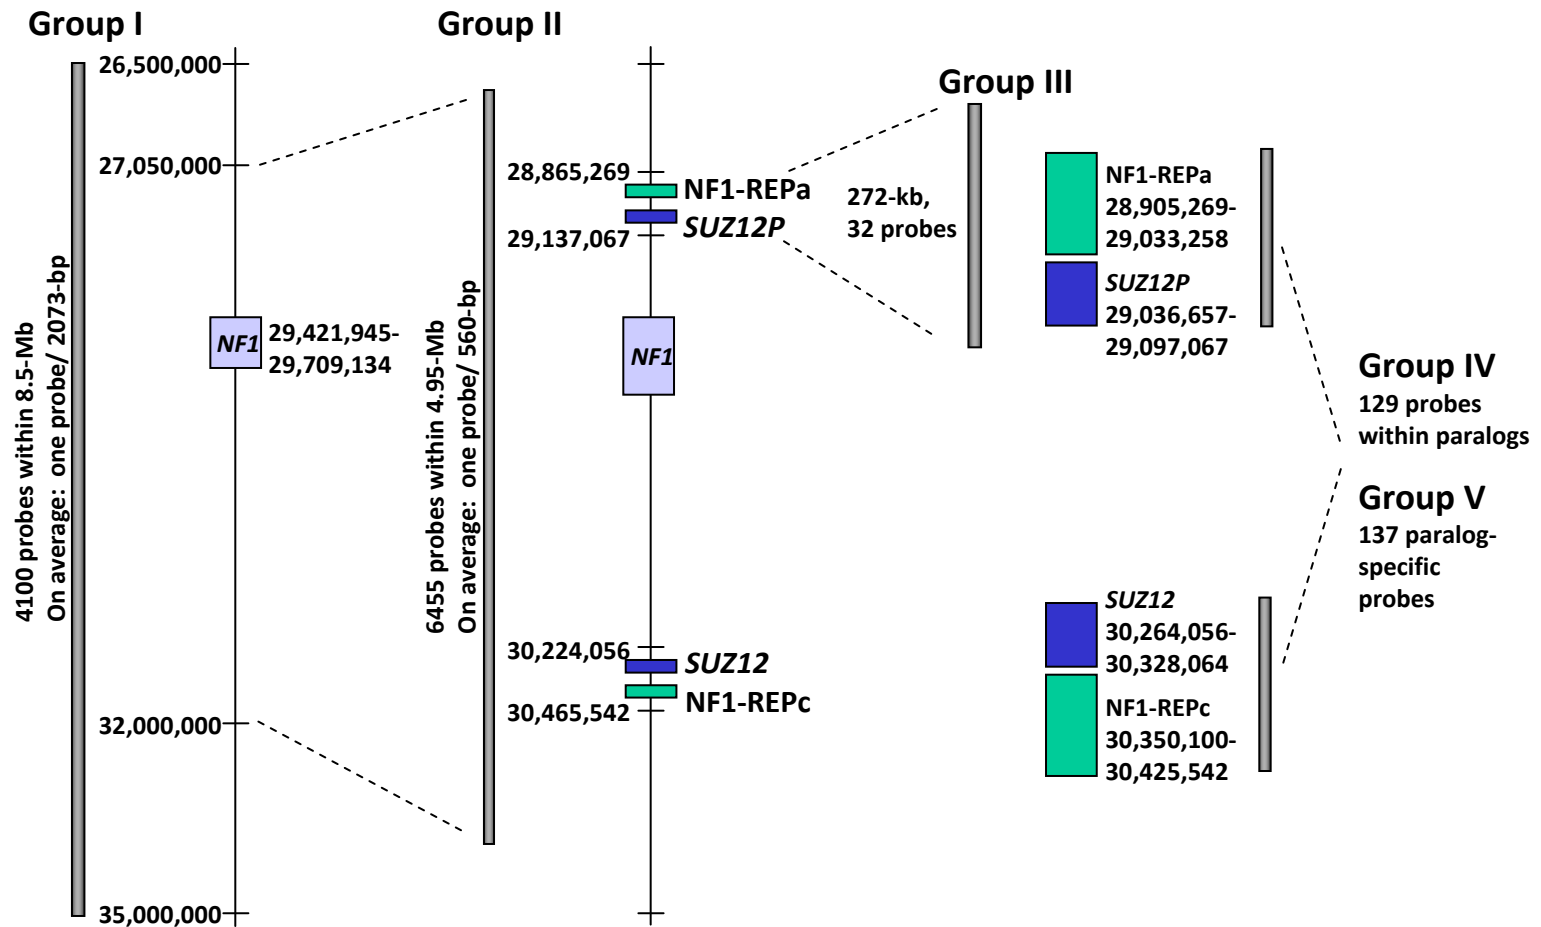

**Figure S24:** Design and analysis of the 8 x 15K custom array (Agilent Technologies, Santa Clara, CA, USA), which contained 15,744 oligonucleotide probes including 4,891 control probes as well as 10,853 test probes assigned to five different groups. The probes in groups I-III were selected from the Agilent eArray library, which provides validated catalogue probes, avoiding all common repeats and other redundant sequences. Since the coverage of the paralogous *NF1*-REPs and the *SUZ12* sequences with regard to these catalogue probes is low, we designed additional customized probes (129 probes in group IV and 137 probes in group V) located within these segmental duplications. For this purpose, we used the genomic tiling approach of the eArray tool (Agilent eArray library, <https://earray.chem.agilent.com/earray/>). The 129 customized probes in group IV were located within regions of absolute sequence identity between the paralogs whereas the 137 probes in group V were designed so as to contain several paralogous sequence variants in order to potentiate paralog-specific hybridization. Restriction enzymatic digestion of 0.5 µg genomic DNA from the patient as well as from a sex-matched control was performed with a mixture of *AclI* and *RsaI* at 37°C for two hrs. Sample labelling of the restriction-digested genomic DNA samples with Cy5-dUTP or Cy3-dUTP, respectively, was performed using the Genomic DNA Enzymatic Labeling Kit (Agilent Technologies). Sample hybridization and washing of the microarrays was carried out by means of the Oligo aCGH-on-chip Hybridization and Wash Buffer Kits (Agilent Technologies). Fluorescent intensities were detected with Scan Control A.8.4.1 Software on the Agilent DNA Microarray Scanner and extracted from the images using Feature Extraction 10.7.3.1 Software (Agilent Technologies) and the design file 033151\_D\_F\_20110323.xml. The software tools Feature Extraction 10.7.3.1 and Genomic Workbench Lite 6.0.130.24 (CGH module) were used for quality control, annotation, statistical data analysis and visualization. The quality of the individual microarrays used in the experiments was validated against the quality metrics (QCmetrics) of this software (Feature Extraction 10.7.3.1). The microarray data were normalized to compensate for varying global signal intensities and to adjust them for downstream analyses. The identification of aberrant regions was performed with the analysis software Genomic Workbench Lite using the aberration algorithm ADM-2 in combination with a centralization algorithm. The analysis of the microarrays was performed by IMG M Laboratories (Martinsried, Germany).

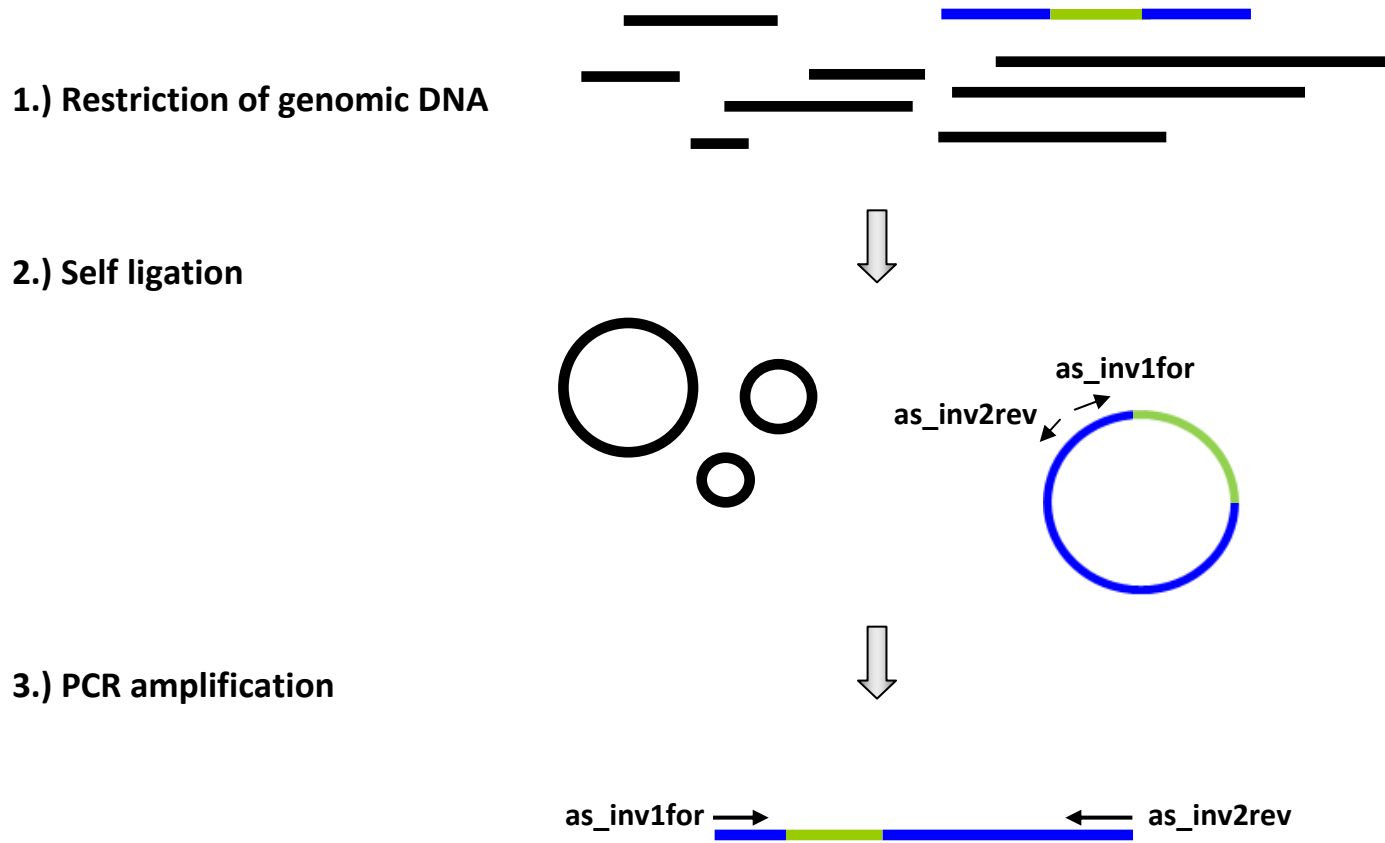

**Figure S25:** Principle of the inverse PCR technique exemplified in the context of the characterization of the centromeric breakpoint of the *NF1* deletion in patient ASB4-55. In step 1, 10 µg genomic DNA derived from blood of the patient was restriction-digested with *PciI* (New England Biolabs, Ipswich, USA). Among the resulting DNA fragments is the target fragment harbouring the deletion junction with the unknown inserted sequence (green) immediately flanked by non-deleted sequences (blue). The restriction fragments were purified with the QIAquick Nucleotide Removal Kit (Qiagen, Hilden, Germany) and eluted in 50 µl water. In step 2, self-ligation of the DNA fragments was set up in a final volume of 1 ml including 50 units T4 DNA ligase (Promega, Mannheim, Germany) and incubated overnight at 16°C. Subsequently, the self-ligation reaction mixture was purified and concentrated with the QIAquick Nucleotide Removal Kit and used as a template for PCR with inversely oriented primers (*as\_inv2rev* and *as\_inv1for*) located in regions flanking the telomeric deletion breakpoint (step 3). These primers were located within unique, non-repetitive sequences in the vicinity of non-deleted regions. The resulting PCR products were cloned using the StrataClone PCR Cloning Kit (Agilent Technologies, Santa Clara, USA) and sequenced from both ends using M13 primers. All enzymes and primers used to analyse the deletion breakpoint-flanking regions in patients DA-77 and ASB4-55 by inverse PCR are listed in Tables S28 and S29.

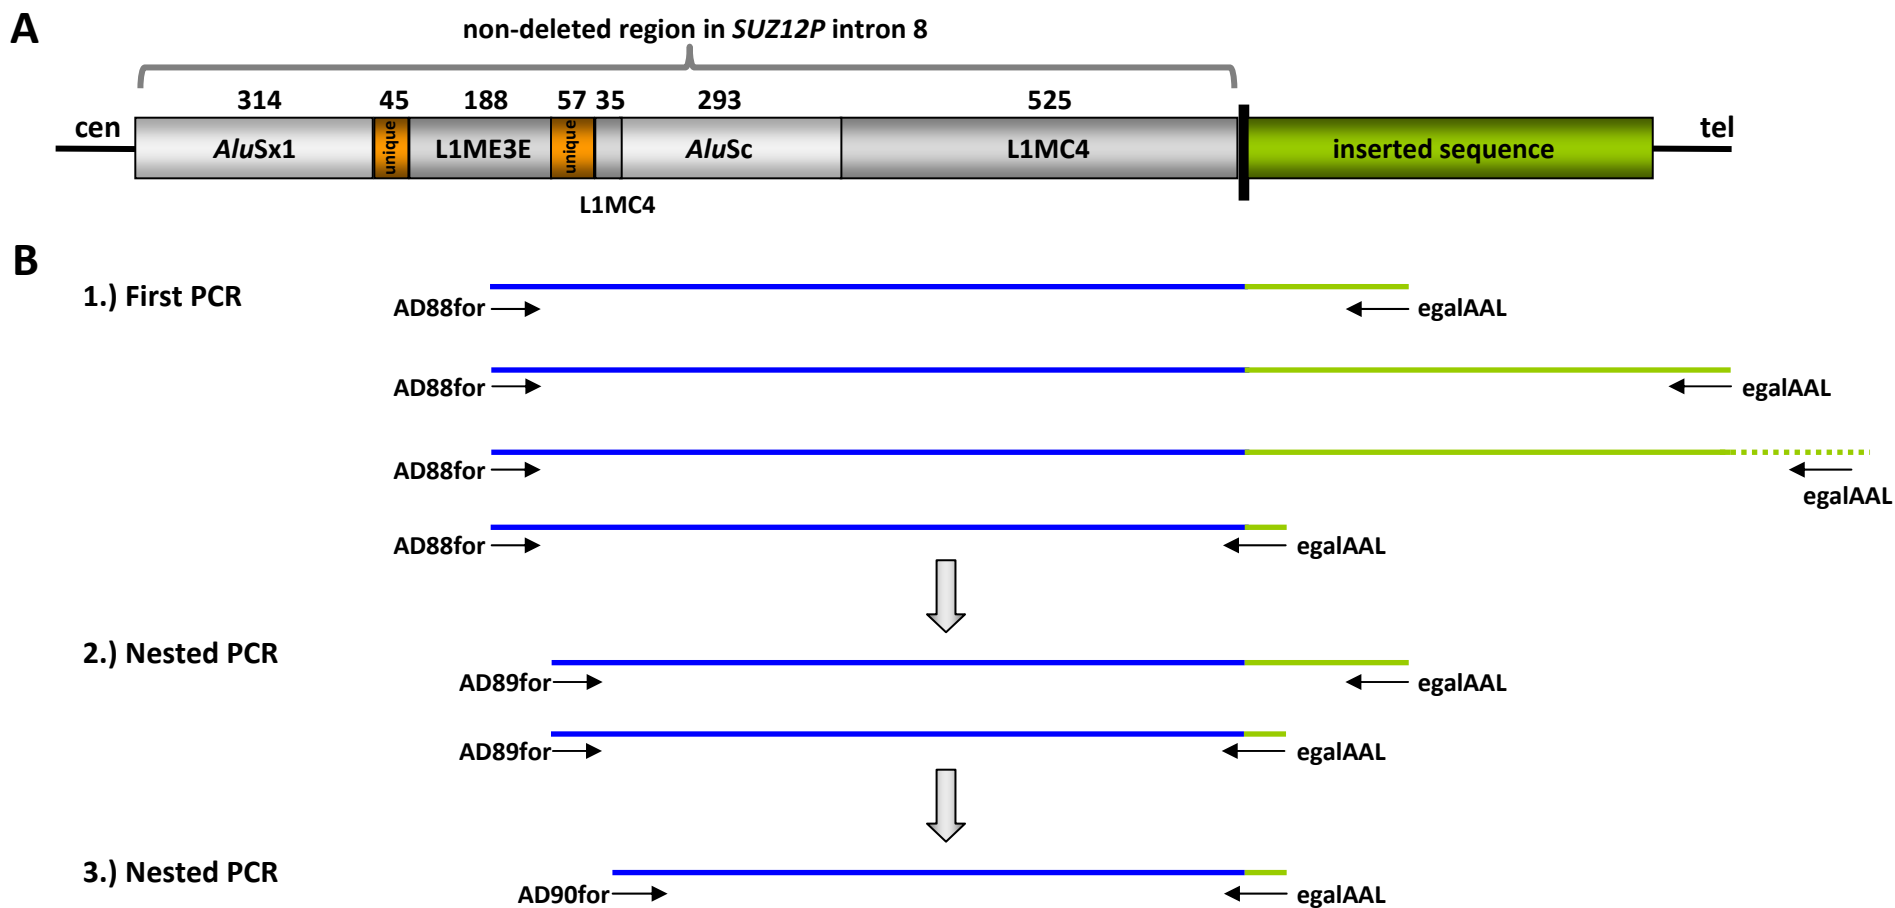

**Figure S26:** Semi-specific PCR performed to narrow down the breakpoint regions and to identify the unknown sequences inserted at the deletion breakpoints. The principle of the assay is explained using the identification of the centromeric deletion breakpoint in patient DA-77 as an example. **(A)** Schema of the centromeric deletion breakpoint region in patient DA-77. **(B)** The first PCR was performed with the region-specific forward primer (AD88for) located within the non-deleted reference sequence (blue) in combination with a non-specific return PCR primer (egalAAL) which is expected to bind within the inserted, unknown sequence (green). In this first step, many different PCR fragments were amplified which were distinguishable by their lengths as schematically indicated. An aliquot of 4  $\mu$ l (100 ng) of the resulting heterogeneous PCR products was used as a template for a nested PCR (step 2) using a region-specific primer AD89for together with the non-specific return primer egalAAL. In step 3 of the assay, a further nested PCR was performed using 4  $\mu$ l of the second PCR as a template and the primers AD90for and egalAAL. Subsequently, the PCR products resulting from step 3 were subject to direct sequence analysis or were cloned and sequenced from both ends using vector-based M13 primers. All PCRs were performed using the Expand Long Template PCR system (Roche, Mannheim, Germany). All primers used to analyse the deletion breakpoint-flanking regions in patients DA-77 and ASB4-55 by semispecific PCR are listed in Tables S30 and S31.

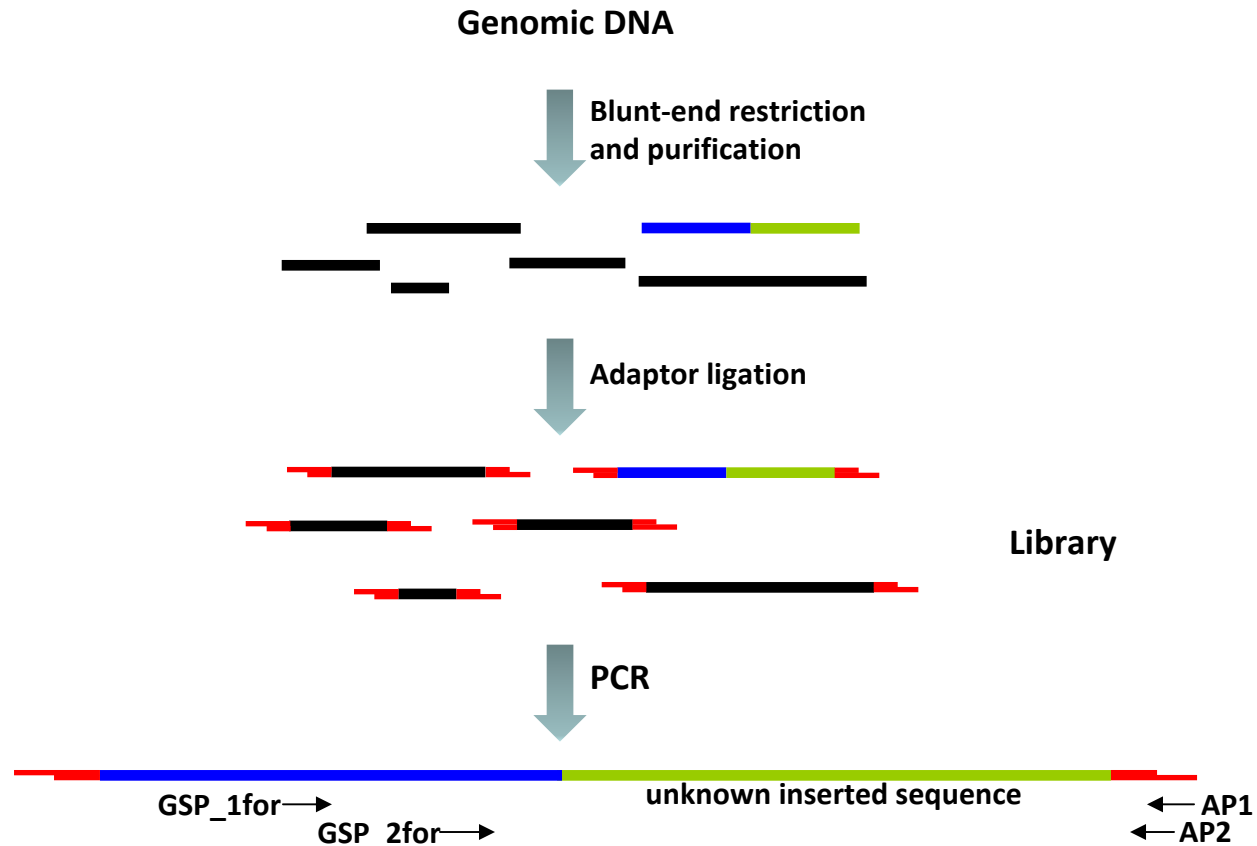

**Figure S27:** Principle of the GenomeWalker assay used to identify unknown sequences inserted at the deletion breakpoints of patients DA-77 and ASB4-55. In the first step, 2.5 µg genomic DNA was digested with a blunt-end restriction enzyme (New England Biolabs, Ipswich, USA) for two hours at the enzyme-specific temperature. Among the restricted DNA fragments was the target fragment that encompasses the deletion breakpoint region (blue) and the adjacent unknown sequence (green). After inactivation of the enzyme, the fragmented DNA was purified by means of the Nucleotide Removal Kit (Qiagen, Hilden, Germany) and resolved in a final volume of 30 µl TE-buffer. An aliquot (4 µl) of the purified DNA fragments was then added to the ligation-reaction which also included 1.9 µl oligonucleotide adaptors (indicated in red), 1.6 µl T4 DNA ligase buffer and 0.5 µl T4 DNA ligase. The ligation was performed at 16°C overnight. The next day, the reaction was inactivated at 70°C for 5 minutes, 72 µl TE-buffer were added and this library of adaptor-ligated restriction fragments was then used as a template for two subsequent PCR steps. The first-step PCR was performed with a region-specific primer (GSP\_1for) located within the non-deleted sequence close to the deletion breakpoint (blue) and the adaptor primer (AP1) which hybridized to the adaptor. Subsequently, an aliquot of this first PCR was used as template for the second PCR using a nested region-specific primer (GSP\_2for) and the adaptor primer AP2. Both PCRs were performed with the Advantage<sup>®</sup> 2 PCR Kit (Clontech, Saint-Germain-en-Laye, France), according to the manufacturer's instructions. The PCR products were then gel-purified (S.N.A.P.<sup>™</sup> UV-Free Gel Purification Kit, Invitrogen, CA, USA) and cloned (StrataClone PCR Cloning Kit, Agilent Technologies, Santa Clara, CA, USA) prior to sequence analysis. All enzymes and primers used for these assays are listed in Tables S32 and S33.

## References cited in Tables S1-S33 and Figures S1-S27 of the additional data

- Cer RZ, Bruce KH, Mudunuri US, Yi M, Volfovsky N, Luke BT, Bacolla A, Collins JR, Stephens RM: **Non-B DB, a database of predicted non-B DNA-forming motifs in mammalian genomes.** *Nucleic Acids Res* 2011, **39**:D383-391.
- Cer RZ, Donohue DE, Mudunuri US, Temiz NA, Loss MA, Starner NJ, Halusa GN, Volfovsky N, Yi M, Luke BT, Bacolla A, Collins JR, Stephens RM: **Non-B DB v2.0, a database of predicted non-B DNA-forming motifs and its associated tools.** *Nucleic Acids Res* 2013, **41**:D94-100.
- Cnossen MH, van der Est MN, Breuning MH, van Asperen CJ, Breslau-Siderius EJ, van der Ploeg AT, de Goede-Bolder A, van den Ouweland AM, Halley DJ, Niermeijer MF: **Deletions spanning the neurofibromatosis type 1 gene, implications for genotype-phenotype correlations in neurofibromatosis type 1?** *Hum Mutat* 1997, **9**:458-464.
- Dorschner MO, Sybert VP, Weaver M, Pletcher BA, Stephens K: **NF1 microdeletion breakpoints are clustered at flanking repetitive sequences.** *Hum Mol Genet* 2000, **9**:35-46.
- Jenne DE, Tinschert S, Stegmann E, Reimann H, Nürnberg P, Horn D, Naumann I, Buske A, Thiel G: **A common set of at least 11 functional genes is lost in the majority of NF1 patients with gross deletions.** *Genomics* 2000, **66**:93-97.
- Kayes LM, Burke W, Riccardi VM, Benett R, Ehrlich P, Rubinstein A, Stephens K: **Deletions spanning the neurofibromatosis I gene, identification and phenotype of five patients.** *Am J Hum Genet* 1994, **54**:424-436.
- Kayes LM, Riccardi VM, Burke W, Bennett RL, Stephens K: **Large de novo DNA deletion in a patient with sporadic neurofibromatosis 1, mental retardation, and dysmorphism.** *J Med Genet* 1992, **29**:686-690.
- Kehrer-Sawatzki H, Kluwe L, Fünsterer C, Mautner VF: **Extensively high load of internal tumors determined by whole body MRI scanning in a patient with neurofibromatosis type 1 and a non-LCR-mediated 2-Mb deletion in 17q11.2.** *Hum Genet* 2005, **116**:466-475.
- Kehrer-Sawatzki H, Schmid E, Fünsterer C, Kluwe L, Mautner VF: **Absence of cutaneous neurofibromas in an NF1 patient with an atypical deletion partially overlapping the common 1.4 Mb microdeleted region.** *Am J Med Genet A* 2008, **146A**:691-699.
- Kehrer-Sawatzki H, Tinschert S, Jenne DE: **Heterogeneity of breakpoints in non-LCR-mediated large constitutional deletions of the 17q11.2 NF1 tumor suppressor region.** *J Med Genet* 2003, **40**:E116.
- Lee J, Ha J, Son SY, Han K: **Human genomic deletions generated by SVA-associated events.** *Comp Funct Genomics* 2012, **2012**: 807270.
- Maertens O, De Schepper S, Vandesompele J, Brems H, Heyns I, Janssens S, Speleman F, Legius E, Messiaen L: **Molecular dissection of isolated disease features in mosaic neurofibromatosis type 1.** *Am J Hum Genet* 2007, **81**:243-251.

Mantripragada KK, Thuresson AC, Piotrowski A, Díaz de Ståhl T, Menzel U, Grigelionis G, Ferner RE, Griffiths S, Bolund L, Mautner V, Nordling M, Legius E, Vetrie D, Dahl N, Messiaen L, Upadhyaya M, Bruder CE, Dumanski JP: **Identification of novel deletion breakpoints bordered by segmental duplications in the *NF1* locus using high resolution array-CGH.** *J Med Genet* 2006, **43**:28-38.

Morrish TA, Gilbert N, Myers JS, Vincent BJ, Stamato TD, Taccioli GE, Batzer MA, Moran JV: **DNA repair mediated by endonuclease-independent LINE-1 retrotransposition.** *Nat Genet* 2002, **31**:159-165.

Pasmant E, de Saint-Trivier A, Laurendeau I, Dieux-Coeslier A, Parfait B, Vidaud M, Vidaud D, Bièche I: **Characterization of a 7.6-Mb germline deletion encompassing the *NF1* locus and about a hundred genes in an *NF1* contiguous gene syndrome patient.** *Eur J Hum Genet* 2008, **16**:1459-1466.

Pasmant E, Sabbagh A, Masliah-Planchon J, Haddad V, Hamel MJ, Laurendeau I, Soulier J, Parfait B, Wolkenstein P, Bièche I, Vidaud M, Vidaud D: **Detection and characterization of *NF1* microdeletions by custom high resolution array CGH.** *J Mol Diagn* 2009, **11**:524-529.

Pasmant E, Sabbagh A, Spurlock G, Laurendeau I, Grillo E, Hamel MJ, Martin L, Barbarot S, Leheup B, Rodriguez D, Lacombe D, Dollfus H, Pasquier L, Isidor B, Ferkal S, Soulier J, Sanson M, Dieux-Coeslier A, Bièche I, Parfait B, Vidaud M, Wolkenstein P, Upadhyaya M, Vidaud D; members of the NF France Network: ***NF1* microdeletions in neurofibromatosis type 1, from genotype to phenotype.** *Hum Mutat* 2010, **31**:E1506-1518.

Riva P, Corrado L, Natacci F, Castorina P, Wu BL, Schneider GH, Clementi M, Tenconi R, Korf BR, Larizza L: ***NF1* microdeletion syndrome, refined FISH characterization of sporadic and familial deletions with locus-specific probes.** *Am J Hum Genet* 2000, **66**:100-109.

Upadhyaya M, Roberts SH, Maynard J, Sorour E, Thompson PW, Vaughan M, Wilkie AO, Hughes HE: **A cytogenetic deletion, del(17)(q11.22q21.1), in a patient with sporadic neurofibromatosis type 1 (NF1) associated with dysmorphism and developmental delay.** *J Med Genet* 1996, **33**:148-152.

Venturin M, Gervasini C, Orzan F, Bentivegna A, Corrado L, Colapietro P, Friso A, Tenconi R, Upadhyaya M, Larizza L, Riva P: **Evidence for non-homologous end joining and nonallelic homologous recombination in atypical *NF1* microdeletions.** *Hum Genet* 2004a, **115**:69-80.

Venturin M, Guarnieri P, Natacci F, Stabile M, Tenconi R, Clementi M, Hernandez C, Thompson P, Upadhyaya M, Larizza L, Riva P: **Mental retardation and cardiovascular malformations in *NF1* microdeleted patients point to candidate genes in 17q11. 2.** *J Med Genet* 2004b, **41**:35-41.

Vogt J, Mussotter T, Bengesser K, Claes K, Högel J, Chuzhanova N, Fu C, van den Ende J, Mautner VF, Cooper DN, Messiaen L, Kehrer-Sawatzki H: **Identification of recurrent type-2 *NF1* microdeletions reveals a mitotic nonallelic homologous recombination hotspot underlying a human genomic disorder.** *Hum Mutat* 2012, **33**:1599-1609.

Wang AJ, Quigley GJ, Kolpak FJ, van der Marel G, van Boom JH, Rich A: **Left-handed double helical DNA, variations in the backbone conformation.** *Science* 1981, **211**:171-176.
